# Supplementary material for: Mechanistic Studies on Aluminum-Catalyzed Ring-Opening Alternating Copolymerization of Maleic Anhydride with Epoxides: Ligand Effects and Quantitative Structure-Activity Relationship Model
Source: MDPI journal article supplement (doi:10.3390/molecules28217279), 2023-10-26
Supplement: s1 [file s1]

## **Supporting information**

To prove the rationality of simplified models, the key steps involving PO insertion (INT3→TS2 and INT10→TS4) mediated by original catalyst (A1 and B1, Figure 1) were calculated for comparison. As shown in the Table S1, that energy differences for the abovementioned steps are almost unchanged, in spite of full or simplified model. The *ortho* and *para* *t*Bu groups on BpyBph ligand and salen ligand have negligible effect on the reactivity difference. Thus, the simplified models used in this work is reasonable.

**Table S1.** The computed free energy barrier for the key steps with full and simplified modes (Energy in kcal/mol)

| Original catalyst         |                                                            |                                                             | simplified models         |                                                            |                                                             |
|---------------------------|------------------------------------------------------------|-------------------------------------------------------------|---------------------------|------------------------------------------------------------|-------------------------------------------------------------|
| System                    | $\Delta G^\ddagger_{(\text{INT3} \rightarrow \text{TS2})}$ | $\Delta G^\ddagger_{(\text{INT10} \rightarrow \text{TS4})}$ | System                    | $\Delta G^\ddagger_{(\text{INT3} \rightarrow \text{TS2})}$ | $\Delta G^\ddagger_{(\text{INT10} \rightarrow \text{TS4})}$ |
| A1                        | 24.1                                                       | 30.6                                                        | A                         | 24.4                                                       | 29.8                                                        |
| B1                        | 18.5                                                       | 33.2                                                        | B                         | 19.3                                                       | 35.4                                                        |
| $\Delta\Delta G^\ddagger$ | 5.6                                                        | -2.6                                                        | $\Delta\Delta G^\ddagger$ | 5.1                                                        | -5.6                                                        |

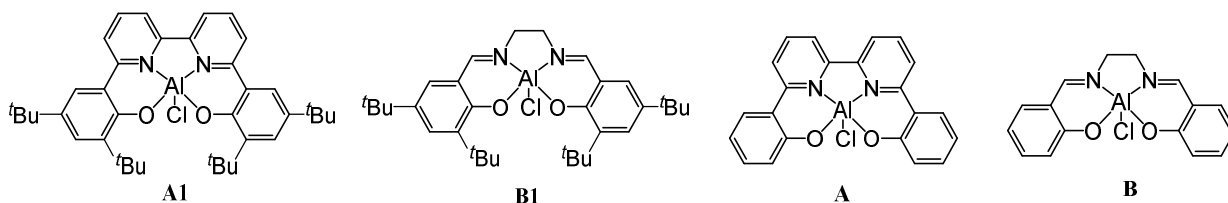

**Table S2.** Computed descriptors and TOF values (in h<sup>-1</sup>) for the six complexes (A1–F1).

|      |          |             |                        | <div style="margin-top: 5px;"> <math>E_{\text{LUMO}}</math>: LUMO energy of the complexes<br/> <math>q_{\text{Al}}</math>: NBO charges of central metal<br/> <math>q_{\text{N}}</math>: average NBO charges of coordinated nitrogen atoms<br/> <math>q_{\text{O}}</math>: average NBO charges of coordinated oxygen atoms<br/> <math>q_{\text{Cl}}</math>: NBO charges of chloride atom<br/> WBI: wiberg bond index<br/> D: dihedral angle of [ONNO] </div> |                 |                |                |                 |        |         |
|------|----------|-------------|------------------------|-------------------------------------------------------------------------------------------------------------------------------------------------------------------------------------------------------------------------------------------------------------------------------------------------------------------------------------------------------------------------------------------------------------------------------------------------------------|-----------------|----------------|----------------|-----------------|--------|---------|
| Cat. | backbone | R           | TOF (h <sup>-1</sup> ) | $E_{\text{LUMO}}$                                                                                                                                                                                                                                                                                                                                                                                                                                           | $q_{\text{Al}}$ | $q_{\text{N}}$ | $q_{\text{O}}$ | $q_{\text{Cl}}$ | WBI    | D       |
| A1   |          | <i>t</i> Bu | 36                     | -3.18                                                                                                                                                                                                                                                                                                                                                                                                                                                       | 1.791           | -0.630         | -0.9165        | -0.549          | 0.7053 | -8.9915 |

|           |                                                                                   |                    |    |       |       |         |         |        |        |         |
|-----------|-----------------------------------------------------------------------------------|--------------------|----|-------|-------|---------|---------|--------|--------|---------|
| <b>B1</b> |  | <sup>t</sup> Bu    | 6  | -2.66 | 1.787 | -0.664  | -0.895  | -0.561 | 0.681  | 15.5077 |
| <b>C1</b> |  | <sup>t</sup> Bu    | 11 | -2.96 | 1.779 | -0.662  | -0.887  | -0.553 | 0.6975 | 6.90562 |
| <b>D1</b> |  | OMe                | 34 | -3.14 | 1.795 | -0.6105 | -0.9105 | -0.549 | 0.7052 | -9.0099 |
| <b>E1</b> |  | CH <sub>2</sub> Ph | 24 | -3.21 | 1.799 | -0.633  | -0.8835 | -0.548 | 0.7034 | -8.1029 |
| <b>F1</b> |  | F                  | 44 | -3.39 | 1.796 | -0.6125 | -0.9105 | -0.544 | 0.7089 | -8.9037 |

Table S3. The comparative data with different computational methods.

| free energy barrier ( $\Delta G_4^\ddagger$ ,<br>kcal/mol) for epoxide opening | <i>Method 1</i> : SMD(THF)/M06-2X/6-311+G(d,p)//M06-L/6-31+G** | <i>Method 2</i> : SMD(THF)/M06-2X/6-311++G(2d, p)// B3LYP-D3/6-311+G** |
|--------------------------------------------------------------------------------|----------------------------------------------------------------|------------------------------------------------------------------------|
| <b>A-catalyzed system</b>                                                      | 33.3                                                           | 32.9                                                                   |
| <b>B-catalyzed system</b>                                                      | 42.5                                                           | 42.2                                                                   |

As shown in the Table S3, the energy differences for the rate-determining steps are almost unchanged (9.2 vs 9.3 kcal/mol)

**The Cartesians of all explored structures as well as a list of the energies and imaginary frequencies were present as follows.**

10  
 PO E = -193.0972738  
 C 0.151012000 0.041337000 0.487973000  
 C 1.499967000 -0.099666000 -0.146184000  
 O -0.823185000 0.781135000 -0.247381000  
 H 0.147997000 0.271815000 1.556075000  
 H 2.078826000 -0.891543000 0.338831000  
 C -1.035105000 -0.612149000 -0.055956000  
 H -1.870059000 -0.871342000 0.594918000

|         |               |              |              |
|---------|---------------|--------------|--------------|
| H       | -0.939938000  | -1.221934000 | -0.955651000 |
| H       | 2.070714000   | 0.829521000  | -0.062795000 |
| H       | 1.402694000   | -0.342726000 | -1.207331000 |
| 9       |               |              |              |
| MAH E = | -379.2701895  |              |              |
| C       | -0.000364000  | -0.154751000 | 1.128813000  |
| C       | 0.001718000   | 1.252486000  | 0.667978000  |
| C       | 0.001718000   | 1.252486000  | -0.667978000 |
| C       | -0.000364000  | -0.154751000 | -1.128813000 |
| O       | -0.002083000  | -0.968887000 | 0.000000000  |
| O       | -0.000364000  | -0.599424000 | -2.242259000 |
| O       | -0.000364000  | -0.599424000 | 2.242259000  |
| H       | 0.003120000   | 2.084525000  | 1.359095000  |
| H       | 0.003120000   | 2.084525000  | -1.359095000 |
| 1       |               |              |              |
| CL- E = | -460.2467384  |              |              |
| C1      | 0.000000000   | 0.000000000  | 0.000000000  |
| 42      |               |              |              |
| A E =   | -1809.5210726 |              |              |
| C1      | -0.000848000  | -0.780235000 | 2.138577000  |
| A1      | -0.000076000  | -0.514909000 | 0.002920000  |
| O       | 1.266749000   | -1.538728000 | -0.753231000 |
| O       | -1.266564000  | -1.537526000 | -0.755519000 |
| N       | 1.299810000   | 1.055318000  | -0.131811000 |
| N       | -1.299948000  | 1.055415000  | -0.131272000 |
| C       | 2.546608000   | -1.555431000 | -0.471640000 |
| C       | -2.546249000  | -1.555070000 | -0.472828000 |
| C       | -3.242498000  | -2.777624000 | -0.592816000 |
| C       | 3.243161000   | -2.777889000 | -0.591121000 |
| C       | 0.734948000   | 2.285804000  | -0.164645000 |
| C       | 2.657857000   | 0.923772000  | -0.107991000 |
| C       | -0.735137000  | 2.285846000  | -0.164460000 |
| C       | 4.580426000   | -2.875172000 | -0.264403000 |
| C       | -2.657934000  | 0.923736000  | -0.107326000 |
| C       | 4.635533000   | -0.533844000 | 0.262817000  |
| C       | 3.272129000   | -0.391827000 | -0.081203000 |
| C       | 5.285535000   | -1.748825000 | 0.186630000  |
| C       | 1.486991000   | 3.451228000  | -0.182597000 |
| C       | -3.271902000  | -0.392022000 | -0.080993000 |
| C       | -1.487267000  | 3.451236000  | -0.182501000 |
| C       | 3.454660000   | 2.089130000  | -0.151348000 |
| C       | 2.875659000   | 3.339219000  | -0.180830000 |
| C       | -4.579628000  | -2.875471000 | -0.265597000 |
| C       | -2.875924000  | 3.339121000  | -0.180143000 |

|   |              |              |              |
|---|--------------|--------------|--------------|
| C | -4.635098000 | -0.534583000 | 0.263498000  |
| C | -3.454864000 | 2.088986000  | -0.150322000 |
| C | -5.284852000 | -1.749670000 | 0.186565000  |
| H | 2.672510000  | -3.640409000 | -0.919624000 |
| H | 5.083597000  | -3.835690000 | -0.339939000 |
| H | 6.327333000  | -1.829484000 | 0.479253000  |
| H | 5.185723000  | 0.326796000  | 0.631653000  |
| H | -2.671837000 | -3.639776000 | -0.922267000 |
| H | -5.082602000 | -3.836049000 | -0.341712000 |
| H | -6.326544000 | -1.830810000 | 0.479436000  |
| H | -5.185298000 | 0.325697000  | 0.633177000  |
| H | -4.532050000 | 1.992388000  | -0.189479000 |
| H | -3.497386000 | 4.228792000  | -0.215290000 |
| H | -1.010012000 | 4.422910000  | -0.205687000 |
| H | 1.009638000  | 4.422866000  | -0.205208000 |
| H | 3.497056000  | 4.228932000  | -0.216069000 |
| H | 4.531835000  | 1.992650000  | -0.190892000 |

52

A\_INT1' E = -2002.6403133

|    |              |              |              |
|----|--------------|--------------|--------------|
| C1 | 0.058078000  | -0.614228000 | -2.402414000 |
| A1 | 0.038364000  | -0.411085000 | -0.215897000 |
| O  | -1.288230000 | -1.540293000 | 0.282620000  |
| O  | 1.362020000  | -1.498194000 | 0.341659000  |
| N  | -1.287629000 | 1.136694000  | -0.199908000 |
| N  | 1.327385000  | 1.161354000  | -0.194549000 |
| C  | -2.527413000 | -1.525701000 | -0.148710000 |
| C  | 2.617702000  | -1.466904000 | -0.026981000 |
| C  | 3.342765000  | -2.679681000 | -0.021344000 |
| C  | -3.214751000 | -2.753945000 | -0.257243000 |
| C  | -0.728165000 | 2.359423000  | -0.060732000 |
| C  | -2.637977000 | 0.993094000  | -0.261850000 |
| C  | 0.744986000  | 2.376041000  | -0.087066000 |
| C  | -4.518860000 | -2.813218000 | -0.708056000 |
| C  | 2.679012000  | 1.043403000  | -0.275196000 |
| C  | -4.558009000 | -0.424729000 | -0.931145000 |
| C  | -3.231200000 | -0.323690000 | -0.459566000 |
| C  | -5.199496000 | -1.640880000 | -1.065229000 |
| C  | -1.494605000 | 3.511235000  | 0.066756000  |
| C  | 3.301887000  | -0.268066000 | -0.393728000 |
| C  | 1.483560000  | 3.550671000  | -0.045398000 |
| C  | -3.450077000 | 2.136957000  | -0.107988000 |
| C  | -2.881283000 | 3.383776000  | 0.056259000  |
| C  | 4.660665000  | -2.735061000 | -0.428428000 |
| C  | 2.872333000  | 3.455076000  | -0.098406000 |

|   |              |              |              |
|---|--------------|--------------|--------------|
| C | 4.643562000  | -0.368478000 | -0.822873000 |
| C | 3.465439000  | 2.214765000  | -0.206129000 |
| C | 5.319466000  | -1.572570000 | -0.853728000 |
| H | -2.662474000 | -3.651986000 | 0.001300000  |
| H | -5.011244000 | -3.777701000 | -0.803017000 |
| H | -6.211817000 | -1.684492000 | -1.453650000 |
| H | -5.082310000 | 0.476545000  | -1.236242000 |
| H | 2.804667000  | -3.571792000 | 0.284503000  |
| H | 5.181417000  | -3.689322000 | -0.437560000 |
| H | 6.343178000  | -1.615125000 | -1.211260000 |
| H | 5.156567000  | 0.521536000  | -1.175598000 |
| H | 4.544696000  | 2.132069000  | -0.210688000 |
| H | 3.484932000  | 4.350256000  | -0.046255000 |
| H | 0.996898000  | 4.515498000  | 0.027145000  |
| H | -1.028251000 | 4.482023000  | 0.181449000  |
| H | -3.511972000 | 4.258998000  | 0.181446000  |
| H | -4.526990000 | 2.026031000  | -0.091519000 |
| C | 0.068449000  | -0.547373000 | 3.232689000  |
| C | -1.171096000 | 0.122113000  | 2.842115000  |
| O | -0.003172000 | 0.236095000  | 2.018793000  |
| H | 0.680396000  | -0.043395000 | 3.982897000  |
| H | -1.474740000 | 1.056535000  | 3.313399000  |
| H | -1.965949000 | -0.477486000 | 2.399394000  |
| C | 0.253968000  | -2.024465000 | 3.111902000  |
| H | 1.298915000  | -2.273511000 | 2.914231000  |
| H | -0.043310000 | -2.501691000 | 4.051424000  |
| H | -0.347079000 | -2.424966000 | 2.293374000  |

43

A\_INT1 E = -2269.8174508

|    |              |              |              |
|----|--------------|--------------|--------------|
| Cl | 0.000466000  | -0.854806000 | 2.001087000  |
| Al | 0.000068000  | -0.490247000 | -0.300885000 |
| O  | 1.359712000  | -1.653367000 | -0.624616000 |
| O  | -1.359719000 | -1.653161000 | -0.624276000 |
| N  | 1.318269000  | 1.040205000  | 0.058325000  |
| N  | -1.317829000 | 1.040305000  | 0.059335000  |
| C  | 2.599201000  | -1.606924000 | -0.261889000 |
| C  | -2.599519000 | -1.606307000 | -0.262813000 |
| C  | -3.342696000 | -2.817631000 | -0.297559000 |
| C  | 3.341545000  | -2.818833000 | -0.293470000 |
| C  | 0.738082000  | 2.256243000  | 0.106596000  |
| C  | 2.666844000  | 0.907955000  | 0.114103000  |
| C  | -0.737458000 | 2.256263000  | 0.107946000  |
| C  | 4.658869000  | -2.883155000 | 0.104621000  |
| C  | -2.666362000 | 0.908148000  | 0.116875000  |

|    |              |              |              |
|----|--------------|--------------|--------------|
| C  | 4.629741000  | -0.529768000 | 0.562413000  |
| C  | 3.286886000  | -0.413689000 | 0.141627000  |
| C  | 5.317481000  | -1.728852000 | 0.556862000  |
| C  | 1.482932000  | 3.428439000  | 0.181321000  |
| C  | -3.286750000 | -0.413378000 | 0.142463000  |
| C  | -1.482024000 | 3.428451000  | 0.185611000  |
| C  | 3.459291000  | 2.077709000  | 0.132680000  |
| C  | 2.870251000  | 3.324843000  | 0.169220000  |
| C  | -4.660300000 | -2.881955000 | 0.099519000  |
| C  | -2.869371000 | 3.325019000  | 0.176164000  |
| C  | -4.629857000 | -0.529636000 | 0.562480000  |
| C  | -3.458577000 | 2.078025000  | 0.138721000  |
| C  | -5.318347000 | -1.728226000 | 0.554050000  |
| H  | 2.803912000  | -3.701497000 | -0.626180000 |
| H  | 5.182540000  | -3.837277000 | 0.084358000  |
| H  | 6.343661000  | -1.773683000 | 0.910317000  |
| H  | 5.140784000  | 0.350278000  | 0.943510000  |
| H  | -2.805440000 | -3.699866000 | -0.632024000 |
| H  | -5.184649000 | -3.835626000 | 0.076642000  |
| H  | -6.344746000 | -1.773057000 | 0.906851000  |
| H  | -5.140691000 | 0.349841000  | 0.945096000  |
| H  | -4.537195000 | 1.994313000  | 0.098201000  |
| H  | -3.486181000 | 4.219933000  | 0.190500000  |
| H  | -0.998619000 | 4.396776000  | 0.229171000  |
| H  | 0.999698000  | 4.396877000  | 0.224281000  |
| H  | 3.487096000  | 4.219767000  | 0.180808000  |
| H  | 4.537830000  | 1.993664000  | 0.090250000  |
| Cl | -0.000529000 | 0.311571000  | -2.516852000 |

53

A\_TS1 E = -2462.9054499 Imaginary Frequency = 418.1279

|    |              |              |              |
|----|--------------|--------------|--------------|
| Cl | 0.425085000  | -0.832822000 | -2.495585000 |
| Al | 0.185288000  | 0.166688000  | -0.449655000 |
| O  | 1.469201000  | 1.427487000  | -0.706436000 |
| O  | -1.261163000 | 1.188061000  | -0.874323000 |
| N  | 1.559343000  | -1.140660000 | 0.327213000  |
| N  | -1.039761000 | -1.376335000 | 0.086373000  |
| C  | 2.738572000  | 1.263994000  | -0.917460000 |
| C  | -2.382053000 | 0.783565000  | -1.400453000 |
| C  | -3.105903000 | 1.688968000  | -2.213510000 |
| C  | 3.441078000  | 2.302995000  | -1.581270000 |
| C  | 1.010322000  | -2.158703000 | 1.021490000  |
| C  | 2.901627000  | -0.951997000 | 0.308703000  |
| C  | -0.451885000 | -2.301106000 | 0.873772000  |
| C  | 4.785350000  | 2.207264000  | -1.870167000 |

|    |              |              |              |
|----|--------------|--------------|--------------|
| C  | -2.352264000 | -1.470699000 | -0.243996000 |
| C  | 4.859032000  | 0.053341000  | -0.819392000 |
| C  | 3.488059000  | 0.119404000  | -0.487745000 |
| C  | 5.509739000  | 1.062411000  | -1.503004000 |
| C  | 1.778081000  | -3.039786000 | 1.773905000  |
| C  | -2.953394000 | -0.507167000 | -1.158641000 |
| C  | -1.170263000 | -3.346990000 | 1.442960000  |
| C  | 3.714236000  | -1.803415000 | 1.091474000  |
| C  | 3.155406000  | -2.836086000 | 1.816053000  |
| C  | -4.295125000 | 1.334415000  | -2.815397000 |
| C  | -2.535538000 | -3.425004000 | 1.178250000  |
| C  | -4.164098000 | -0.836870000 | -1.804893000 |
| C  | -3.122348000 | -2.502374000 | 0.335511000  |
| C  | -4.830147000 | 0.051017000  | -2.627851000 |
| H  | 2.857367000  | 3.170561000  | -1.872991000 |
| H  | 5.280573000  | 3.017835000  | -2.400902000 |
| H  | 6.560179000  | 0.961708000  | -1.759497000 |
| H  | 5.420443000  | -0.841254000 | -0.562420000 |
| H  | -2.666461000 | 2.671052000  | -2.356735000 |
| H  | -4.811222000 | 2.051465000  | -3.450199000 |
| H  | -5.747957000 | -0.247214000 | -3.125791000 |
| H  | -4.571576000 | -1.837247000 | -1.683822000 |
| H  | -4.187370000 | -2.544663000 | 0.143754000  |
| H  | -3.136621000 | -4.208026000 | 1.632509000  |
| H  | -0.684213000 | -4.080336000 | 2.075273000  |
| H  | 1.319361000  | -3.852802000 | 2.323926000  |
| H  | 3.785854000  | -3.480676000 | 2.422576000  |
| H  | 4.780121000  | -1.620117000 | 1.146430000  |
| C  | -0.820930000 | 1.046048000  | 2.454789000  |
| C  | -2.259262000 | 0.666005000  | 2.268873000  |
| O  | 0.145403000  | 0.710948000  | 1.450711000  |
| H  | -0.443181000 | 0.782893000  | 3.449240000  |
| H  | -2.846230000 | 1.250240000  | 2.984413000  |
| C  | -0.336189000 | 2.300618000  | 1.930725000  |
| H  | 0.560064000  | 2.754241000  | 2.322150000  |
| H  | -0.820678000 | 2.728505000  | 1.063556000  |
| C1 | -1.607399000 | 3.976874000  | 3.413560000  |
| H  | -2.426076000 | -0.401366000 | 2.452864000  |
| H  | -2.608998000 | 0.917281000  | 1.264521000  |

53

A\_INT2 E = -2462.93804

|    |              |              |              |
|----|--------------|--------------|--------------|
| C1 | -0.379882000 | 0.621109000  | -2.475856000 |
| A1 | -0.163799000 | -0.197273000 | -0.274890000 |
| O  | -1.453801000 | -1.471520000 | -0.552547000 |



|   |              |              |              |
|---|--------------|--------------|--------------|
| O | 1.302540000  | -1.218930000 | -0.702655000 |
| N | -1.564140000 | 1.209275000  | 0.239904000  |
| N | 1.050907000  | 1.440984000  | 0.029832000  |
| C | -2.714915000 | -1.321465000 | -0.791241000 |
| C | 2.427619000  | -0.842421000 | -1.232093000 |
| C | 3.171063000  | -1.796912000 | -1.972219000 |
| C | -3.416423000 | -2.421106000 | -1.358283000 |
| C | -1.030840000 | 2.300614000  | 0.822227000  |
| C | -2.903719000 | 1.019948000  | 0.198160000  |
| C | 0.437578000  | 2.428781000  | 0.710095000  |
| C | -4.754255000 | -2.354339000 | -1.680206000 |
| C | 2.373159000  | 1.499799000  | -0.247958000 |
| C | -4.833796000 | -0.103993000 | -0.858468000 |
| C | -3.470535000 | -0.135596000 | -0.492092000 |
| C | -5.479699000 | -1.175427000 | -1.446284000 |
| C | -1.819392000 | 3.271895000  | 1.430626000  |
| C | 2.997288000  | 0.463006000  | -1.067419000 |
| C | 1.139671000  | 3.520262000  | 1.212722000  |
| C | -3.737884000 | 1.957799000  | 0.849914000  |
| C | -3.197243000 | 3.072946000  | 1.457070000  |
| C | 4.375718000  | -1.485496000 | -2.568296000 |
| C | 2.516868000  | 3.564544000  | 1.010512000  |
| C | 4.222665000  | 0.745800000  | -1.705108000 |
| C | 3.132544000  | 2.565970000  | 0.281351000  |
| C | 4.910721000  | -0.194497000 | -2.450786000 |
| H | -2.830087000 | -3.314067000 | -1.553706000 |
| H | -5.242724000 | -3.213939000 | -2.135713000 |
| H | -6.524435000 | -1.096115000 | -1.732956000 |
| H | -5.396249000 | 0.814020000  | -0.708830000 |
| H | 2.729924000  | -2.784631000 | -2.067783000 |
| H | 4.902372000  | -2.243085000 | -3.145622000 |
| H | 5.840521000  | 0.071261000  | -2.945496000 |
| H | 4.627145000  | 1.753051000  | -1.641622000 |
| H | 4.206535000  | 2.580638000  | 0.139256000  |
| H | 3.104819000  | 4.379466000  | 1.424990000  |
| H | 0.634033000  | 4.308510000  | 1.758058000  |
| H | -1.376121000 | 4.149878000  | 1.885313000  |
| H | -3.844299000 | 3.787886000  | 1.959077000  |
| H | -4.805535000 | 1.782859000  | 0.897883000  |
| C | 0.693028000  | -1.177968000 | 2.395695000  |
| C | 2.140345000  | -0.693021000 | 2.426447000  |
| O | -0.119508000 | -0.445616000 | 1.556816000  |
| H | 0.300869000  | -1.106537000 | 3.431650000  |
| H | 2.732721000  | -1.240190000 | 3.168442000  |

|    |              |              |             |
|----|--------------|--------------|-------------|
| C  | 0.579168000  | -2.643497000 | 1.984370000 |
| H  | -0.469301000 | -2.939962000 | 1.937428000 |
| H  | 1.056265000  | -2.824597000 | 1.018865000 |
| Cl | 1.374509000  | -3.780439000 | 3.181869000 |
| H  | 2.164573000  | 0.372797000  | 2.680607000 |
| H  | 2.616081000  | -0.821128000 | 1.448023000 |

52

A\_INT3 E = -2002.6408085

|    |              |              |              |
|----|--------------|--------------|--------------|
| Al | -0.190047000 | -0.113260000 | -0.274256000 |
| O  | -1.303681000 | -0.896138000 | -1.448263000 |
| O  | 1.214159000  | -1.004439000 | -0.960225000 |
| N  | -1.620800000 | 1.310481000  | -0.002389000 |
| N  | 0.966304000  | 1.571885000  | -0.172099000 |
| C  | -2.594743000 | -1.085695000 | -1.301769000 |
| C  | 2.436930000  | -0.704912000 | -1.299774000 |
| C  | 3.213946000  | -1.703165000 | -1.931558000 |
| C  | -3.168018000 | -2.225909000 | -1.906647000 |
| C  | -1.148572000 | 2.494176000  | 0.440766000  |
| C  | -2.958127000 | 1.077588000  | -0.073956000 |
| C  | 0.318169000  | 2.610461000  | 0.418188000  |
| C  | -4.507430000 | -2.523776000 | -1.757034000 |
| C  | 2.323503000  | 1.618309000  | -0.327996000 |
| C  | -4.808389000 | -0.542289000 | -0.436829000 |
| C  | -3.447290000 | -0.193137000 | -0.584261000 |
| C  | -5.338850000 | -1.685846000 | -0.999356000 |
| C  | -1.985453000 | 3.522095000  | 0.850699000  |
| C  | 3.032350000  | 0.565275000  | -1.038649000 |
| C  | 0.984306000  | 3.705051000  | 0.946459000  |
| C  | -3.844723000 | 2.107566000  | 0.312081000  |
| C  | -3.361613000 | 3.311320000  | 0.780185000  |
| C  | 4.508928000  | -1.456630000 | -2.336143000 |
| C  | 2.374647000  | 3.733733000  | 0.863654000  |
| C  | 4.356658000  | 0.783692000  | -1.486222000 |
| C  | 3.034584000  | 2.707555000  | 0.224289000  |
| C  | 5.087852000  | -0.195290000 | -2.127183000 |
| H  | -2.501307000 | -2.870800000 | -2.470174000 |
| H  | -4.913344000 | -3.421693000 | -2.215838000 |
| H  | -6.385297000 | -1.931861000 | -0.851147000 |
| H  | -5.459995000 | 0.088736000  | 0.160001000  |
| H  | 2.739721000  | -2.665891000 | -2.094146000 |
| H  | 5.077468000  | -2.240749000 | -2.829333000 |
| H  | 6.095544000  | 0.014725000  | -2.470397000 |
| H  | 4.810460000  | 1.761477000  | -1.358332000 |
| H  | 4.115096000  | 2.716220000  | 0.172167000  |

|    |              |              |             |
|----|--------------|--------------|-------------|
| H  | 2.934278000  | 4.554819000  | 1.301414000 |
| H  | 0.439118000  | 4.504396000  | 1.432836000 |
| H  | -1.585979000 | 4.468706000  | 1.193385000 |
| H  | -4.050428000 | 4.098046000  | 1.072927000 |
| H  | -4.912350000 | 1.959502000  | 0.214263000 |
| C  | 0.453312000  | -1.370629000 | 2.226630000 |
| C  | 1.820248000  | -0.724859000 | 2.391207000 |
| O  | -0.383467000 | -0.633980000 | 1.382585000 |
| H  | -0.026549000 | -1.426852000 | 3.218352000 |
| H  | 2.432033000  | -1.260002000 | 3.123307000 |
| C  | 0.536903000  | -2.789789000 | 1.676345000 |
| H  | -0.466147000 | -3.190838000 | 1.519162000 |
| H  | 1.089537000  | -2.812956000 | 0.733011000 |
| Cl | 1.377574000  | -3.916035000 | 2.813983000 |
| H  | 1.705478000  | 0.311362000  | 2.727027000 |
| H  | 2.365136000  | -0.720843000 | 1.439021000 |

62

A\_INT4 E = -2195.7540886

|    |              |              |              |
|----|--------------|--------------|--------------|
| Al | -0.085595000 | 0.412211000  | 0.039013000  |
| O  | -1.308498000 | 1.215913000  | 1.091227000  |
| O  | 1.324965000  | 0.947233000  | 1.029295000  |
| N  | -1.554235000 | -0.692379000 | -0.862442000 |
| N  | 1.005068000  | -1.155479000 | -0.681843000 |
| C  | -2.605226000 | 1.130056000  | 1.179603000  |
| C  | 2.390789000  | 0.317080000  | 1.440757000  |
| C  | 3.097552000  | 0.854629000  | 2.541746000  |
| C  | -3.236947000 | 1.861576000  | 2.215559000  |
| C  | -1.047300000 | -1.467291000 | -1.848459000 |
| C  | -2.883242000 | -0.420805000 | -0.807173000 |
| C  | 0.393663000  | -1.758288000 | -1.726222000 |
| C  | -4.600145000 | 1.810499000  | 2.416643000  |
| C  | 2.295014000  | -1.443129000 | -0.370817000 |
| C  | -4.819275000 | 0.315284000  | 0.554365000  |
| C  | -3.427532000 | 0.348929000  | 0.305452000  |
| C  | -5.407946000 | 1.020293000  | 1.585151000  |
| C  | -1.838328000 | -1.993843000 | -2.858880000 |
| C  | 2.908265000  | -0.860253000 | 0.815411000  |
| C  | 1.062523000  | -2.638246000 | -2.565734000 |
| C  | -3.718073000 | -0.911651000 | -1.837438000 |
| C  | -3.197585000 | -1.684652000 | -2.853610000 |
| C  | 4.229551000  | 0.245442000  | 3.043336000  |
| C  | 2.409295000  | -2.893536000 | -2.309904000 |
| C  | 4.062477000  | -1.461244000 | 1.365909000  |
| C  | 3.019335000  | -2.311766000 | -1.217579000 |

|    |              |              |              |
|----|--------------|--------------|--------------|
| C  | 4.716433000  | -0.935151000 | 2.462874000  |
| H  | -2.591071000 | 2.459581000  | 2.850974000  |
| H  | -5.046259000 | 2.378394000  | 3.229321000  |
| H  | -6.478423000 | 0.954279000  | 1.750274000  |
| H  | -5.453791000 | -0.314234000 | -0.062136000 |
| H  | 2.699260000  | 1.762948000  | 2.982922000  |
| H  | 4.739000000  | 0.679687000  | 3.899941000  |
| H  | 5.590590000  | -1.433740000 | 2.868991000  |
| H  | 4.433801000  | -2.387488000 | 0.935925000  |
| H  | 4.068707000  | -2.494305000 | -1.023112000 |
| H  | 2.975229000  | -3.548730000 | -2.965560000 |
| H  | 0.556201000  | -3.111493000 | -3.398245000 |
| H  | -1.411126000 | -2.607503000 | -3.642576000 |
| H  | -3.843427000 | -2.045046000 | -3.648836000 |
| H  | -4.768751000 | -0.652536000 | -1.845980000 |
| C  | 0.931989000  | 2.275512000  | -1.917942000 |
| C  | 2.304144000  | 1.642088000  | -2.100637000 |
| O  | -0.022088000 | 1.373127000  | -1.448414000 |
| H  | 0.595897000  | 2.653537000  | -2.899761000 |
| H  | 3.012765000  | 2.344939000  | -2.549029000 |
| C  | 0.958037000  | 3.461388000  | -0.959442000 |
| H  | -0.050797000 | 3.854032000  | -0.821644000 |
| H  | 1.372218000  | 3.173319000  | 0.010389000  |
| Cl | 1.968006000  | 4.830237000  | -1.582786000 |
| H  | 2.226683000  | 0.766081000  | -2.753823000 |
| H  | 2.714411000  | 1.319058000  | -1.136542000 |
| C  | -0.368500000 | -2.591381000 | 2.178200000  |
| C  | -0.626932000 | -3.574923000 | 1.080551000  |
| O  | -0.268215000 | -1.208079000 | 1.813679000  |
| H  | 0.395004000  | -2.875641000 | 2.905095000  |
| H  | -0.962637000 | -4.528609000 | 1.498672000  |
| C  | -1.376340000 | -1.621541000 | 2.608222000  |
| H  | -1.375862000 | -1.226221000 | 3.622520000  |
| H  | -2.339563000 | -1.597540000 | 2.095432000  |
| H  | 0.280668000  | -3.769480000 | 0.500062000  |
| H  | -1.401434000 | -3.207036000 | 0.400962000  |

63

A\_TS2 E = -2656.0225657    Imaginary Frequency= 417.2632

|    |              |              |              |
|----|--------------|--------------|--------------|
| Al | -0.183708000 | 0.470109000  | -0.187270000 |
| O  | 0.878823000  | 1.542609000  | -1.213731000 |
| O  | -1.612920000 | 0.340683000  | -1.337139000 |
| N  | 1.253242000  | 0.311184000  | 1.262022000  |
| N  | -1.078668000 | -0.877658000 | 1.082896000  |
| C  | 2.164393000  | 1.703586000  | -1.185610000 |

|    |              |              |              |
|----|--------------|--------------|--------------|
| C  | -2.383887000 | -0.685083000 | -1.547566000 |
| C  | -2.989039000 | -0.825528000 | -2.821895000 |
| C  | 2.786398000  | 2.269562000  | -2.330053000 |
| C  | 0.771778000  | -0.187100000 | 2.420482000  |
| C  | 2.480533000  | 0.881125000  | 1.201628000  |
| C  | -0.541110000 | -0.858868000 | 2.319239000  |
| C  | 4.151919000  | 2.436752000  | -2.415257000 |
| C  | -2.209415000 | -1.571186000 | 0.822678000  |
| C  | 4.400040000  | 1.544480000  | -0.204906000 |
| C  | 3.004243000  | 1.375250000  | -0.067369000 |
| C  | 4.980709000  | 2.055399000  | -1.348983000 |
| C  | 1.496369000  | -0.133113000 | 3.603895000  |
| C  | -2.705689000 | -1.661142000 | -0.547955000 |
| C  | -1.150298000 | -1.498950000 | 3.392394000  |
| C  | 3.236713000  | 0.986971000  | 2.392390000  |
| C  | 2.746529000  | 0.483190000  | 3.578694000  |
| C  | -3.816936000 | -1.887610000 | -3.124758000 |
| C  | -2.355836000 | -2.160379000 | 3.165151000  |
| C  | -3.545123000 | -2.738500000 | -0.899926000 |
| C  | -2.883566000 | -2.203686000 | 1.889546000  |
| C  | -4.093755000 | -2.869800000 | -2.162645000 |
| H  | 2.130037000  | 2.534914000  | -3.153504000 |
| H  | 4.588239000  | 2.845342000  | -3.324428000 |
| H  | 6.060523000  | 2.135329000  | -1.425886000 |
| H  | 5.051401000  | 1.214713000  | 0.599835000  |
| H  | -2.750104000 | -0.065359000 | -3.559573000 |
| H  | -4.242843000 | -1.969099000 | -4.122642000 |
| H  | -4.715401000 | -3.726613000 | -2.404335000 |
| H  | -3.738692000 | -3.514919000 | -0.163308000 |
| H  | -3.828810000 | -2.700438000 | 1.705608000  |
| H  | -2.877588000 | -2.641816000 | 3.987884000  |
| H  | -0.705088000 | -1.482015000 | 4.380130000  |
| H  | 1.099895000  | -0.547896000 | 4.522994000  |
| H  | 3.330822000  | 0.571331000  | 4.490563000  |
| H  | 4.194282000  | 1.492142000  | 2.373821000  |
| C  | -1.974481000 | 2.554648000  | 0.896996000  |
| C  | -3.234429000 | 1.732625000  | 1.152714000  |
| O  | -0.814953000 | 1.803665000  | 0.898785000  |
| H  | -1.908542000 | 3.315888000  | 1.700499000  |
| H  | -4.121236000 | 2.371004000  | 1.230877000  |
| C  | -2.031880000 | 3.313932000  | -0.425433000 |
| H  | -1.098725000 | 3.854488000  | -0.588512000 |
| H  | -2.215769000 | 2.638566000  | -1.263750000 |
| Cl | -3.361922000 | 4.567719000  | -0.460859000 |

|    |              |              |              |
|----|--------------|--------------|--------------|
| H  | -3.126131000 | 1.174859000  | 2.089772000  |
| H  | -3.402210000 | 1.013689000  | 0.343334000  |
| C  | 0.984406000  | -2.451375000 | -1.031843000 |
| C  | 0.853408000  | -3.186490000 | 0.272558000  |
| O  | 0.625139000  | -1.079762000 | -1.120184000 |
| H  | 0.572851000  | -3.023225000 | -1.872739000 |
| H  | 1.455429000  | -4.097451000 | 0.197873000  |
| C  | 2.227184000  | -1.757087000 | -1.300414000 |
| H  | 2.518088000  | -1.497578000 | -2.306536000 |
| H  | 2.794239000  | -1.363221000 | -0.469369000 |
| Cl | 3.962172000  | -3.594744000 | -1.334953000 |
| H  | -0.184180000 | -3.454340000 | 0.497067000  |
| H  | 1.257671000  | -2.592260000 | 1.098857000  |

63

A\_INT5 E = -2656.051293

|    |              |              |              |
|----|--------------|--------------|--------------|
| Al | -0.152800000 | 0.353364000  | -0.270410000 |
| O  | 0.970590000  | 1.436595000  | -1.269132000 |
| O  | -1.660425000 | 0.382835000  | -1.351310000 |
| N  | 1.248763000  | 0.239677000  | 1.260790000  |
| N  | -1.153522000 | -0.829763000 | 1.097567000  |
| C  | 2.255376000  | 1.528263000  | -1.216532000 |
| C  | -2.473085000 | -0.610835000 | -1.535962000 |
| C  | -3.122162000 | -0.730070000 | -2.793072000 |
| C  | 2.942889000  | 2.004984000  | -2.369152000 |
| C  | 0.712004000  | -0.165039000 | 2.429960000  |
| C  | 2.476489000  | 0.805845000  | 1.217125000  |
| C  | -0.613684000 | -0.814103000 | 2.330597000  |
| C  | 4.316971000  | 2.094898000  | -2.424296000 |
| C  | -2.302242000 | -1.494106000 | 0.843490000  |
| C  | 4.458622000  | 1.309637000  | -0.164550000 |
| C  | 3.054321000  | 1.212292000  | -0.061032000 |
| C  | 5.098203000  | 1.728999000  | -1.316169000 |
| C  | 1.389116000  | -0.031468000 | 3.637400000  |
| C  | -2.813325000 | -1.572005000 | -0.523617000 |
| C  | -1.230270000 | -1.439332000 | 3.409862000  |
| C  | 3.185259000  | 0.995672000  | 2.425612000  |
| C  | 2.642958000  | 0.576128000  | 3.623512000  |
| C  | -3.998889000 | -1.757966000 | -3.073592000 |
| C  | -2.454844000 | -2.068012000 | 3.191261000  |
| C  | -3.702594000 | -2.615109000 | -0.854944000 |
| C  | -2.991522000 | -2.097726000 | 1.918555000  |
| C  | -4.288161000 | -2.728740000 | -2.103262000 |
| H  | 2.323914000  | 2.263992000  | -3.223301000 |
| H  | 4.797531000  | 2.434841000  | -3.339994000 |

|    |              |              |              |
|----|--------------|--------------|--------------|
| H  | 6.182813000  | 1.757839000  | -1.362988000 |
| H  | 5.067356000  | 0.998750000  | 0.681689000  |
| H  | -2.871918000 | 0.019086000  | -3.538599000 |
| H  | -4.454257000 | -1.822447000 | -4.060188000 |
| H  | -4.948848000 | -3.561508000 | -2.326443000 |
| H  | -3.909573000 | -3.382231000 | -0.111917000 |
| H  | -3.955046000 | -2.562266000 | 1.744307000  |
| H  | -2.985513000 | -2.533170000 | 4.018057000  |
| H  | -0.775633000 | -1.438204000 | 4.393814000  |
| H  | 0.943478000  | -0.363378000 | 4.567919000  |
| H  | 3.185001000  | 0.733084000  | 4.552614000  |
| H  | 4.140682000  | 1.506519000  | 2.409909000  |
| C  | -1.800219000 | 2.605551000  | 0.819311000  |
| C  | -3.103859000 | 1.870454000  | 1.126090000  |
| O  | -0.688422000 | 1.792715000  | 0.800422000  |
| H  | -1.670410000 | 3.377877000  | 1.607021000  |
| H  | -3.944632000 | 2.567237000  | 1.219347000  |
| C  | -1.851366000 | 3.348957000  | -0.513138000 |
| H  | -0.891483000 | 3.826905000  | -0.712181000 |
| H  | -2.108020000 | 2.677989000  | -1.335001000 |
| Cl | -3.099316000 | 4.694146000  | -0.529396000 |
| H  | -3.002845000 | 1.322438000  | 2.070023000  |
| H  | -3.342101000 | 1.149774000  | 0.336648000  |
| C  | 1.128750000  | -2.351249000 | -1.012016000 |
| C  | 0.844517000  | -3.165851000 | 0.249348000  |
| O  | 0.430216000  | -1.180287000 | -1.105028000 |
| H  | 0.885926000  | -3.001916000 | -1.879433000 |
| H  | 1.388974000  | -4.116592000 | 0.240258000  |
| C  | 2.615476000  | -2.011440000 | -1.123266000 |
| H  | 2.801248000  | -1.376643000 | -1.991736000 |
| H  | 2.979620000  | -1.507339000 | -0.223604000 |
| Cl | 3.681464000  | -3.486577000 | -1.331034000 |
| H  | -0.226441000 | -3.379244000 | 0.327941000  |
| H  | 1.149312000  | -2.609828000 | 1.145223000  |

72

A\_TS3 E = -3035.3134411 Imaginary Frequency= 153.1102

|    |              |              |              |
|----|--------------|--------------|--------------|
| Al | 0.890427000  | -0.604330000 | -0.299735000 |
| O  | 0.143839000  | -1.404009000 | -1.731229000 |
| O  | 1.683075000  | 0.787463000  | -1.111746000 |
| N  | -0.140787000 | -1.852352000 | 0.942797000  |
| N  | 1.234429000  | 0.277875000  | 1.508099000  |
| C  | -0.956332000 | -2.071242000 | -1.857846000 |
| C  | 1.711310000  | 2.043414000  | -0.759554000 |
| C  | 1.731599000  | 3.034175000  | -1.766958000 |

|    |              |              |              |
|----|--------------|--------------|--------------|
| C  | -1.557472000 | -2.143086000 | -3.141746000 |
| C  | 0.327922000  | -1.805075000 | 2.207679000  |
| C  | -1.004745000 | -2.820418000 | 0.553219000  |
| C  | 1.106388000  | -0.591946000 | 2.531044000  |
| C  | -2.734206000 | -2.830648000 | -3.351124000 |
| C  | 1.778180000  | 1.504858000  | 1.697040000  |
| C  | -2.792361000 | -3.464614000 | -1.035869000 |
| C  | -1.582664000 | -2.782073000 | -0.782384000 |
| C  | -3.374559000 | -3.491876000 | -2.289290000 |
| C  | -0.003380000 | -2.767641000 | 3.152493000  |
| C  | 1.790959000  | 2.461543000  | 0.604108000  |
| C  | 1.580796000  | -0.307713000 | 3.804532000  |
| C  | -1.348454000 | -3.834310000 | 1.475612000  |
| C  | -0.843344000 | -3.809048000 | 2.759484000  |
| C  | 1.796077000  | 4.374689000  | -1.450752000 |
| C  | 2.206157000  | 0.923524000  | 4.009900000  |
| C  | 1.858589000  | 3.842922000  | 0.889398000  |
| C  | 2.295881000  | 1.827775000  | 2.972034000  |
| C  | 1.856696000  | 4.793636000  | -0.111696000 |
| H  | -1.066702000 | -1.588418000 | -3.935174000 |
| H  | -3.181898000 | -2.838863000 | -4.342803000 |
| H  | -4.320423000 | -4.002775000 | -2.442456000 |
| H  | -3.308267000 | -3.950069000 | -0.210521000 |
| H  | 1.635156000  | 2.689301000  | -2.790509000 |
| H  | 1.769552000  | 5.114816000  | -2.247182000 |
| H  | 1.868741000  | 5.850461000  | 0.137457000  |
| H  | 1.856843000  | 4.170249000  | 1.926820000  |
| H  | 2.783829000  | 2.784028000  | 3.119203000  |
| H  | 2.614837000  | 1.171124000  | 4.985898000  |
| H  | 1.468161000  | -1.017266000 | 4.615865000  |
| H  | 0.377183000  | -2.710098000 | 4.165451000  |
| H  | -1.105165000 | -4.594397000 | 3.463392000  |
| H  | -1.995068000 | -4.644430000 | 1.160838000  |
| C  | 3.623739000  | -1.624050000 | -0.342718000 |
| C  | 4.319588000  | -0.479495000 | 0.386125000  |
| O  | 2.277972000  | -1.736761000 | -0.031823000 |
| H  | 4.133078000  | -2.564637000 | -0.054490000 |
| H  | 5.395419000  | -0.468987000 | 0.181133000  |
| C  | 3.738807000  | -1.502392000 | -1.859350000 |
| H  | 3.186266000  | -2.308338000 | -2.344165000 |
| H  | 3.365049000  | -0.537873000 | -2.211151000 |
| Cl | 5.462918000  | -1.644264000 | -2.441230000 |
| H  | 4.174898000  | -0.586615000 | 1.466985000  |
| H  | 3.903169000  | 0.485728000  | 0.077472000  |



|    |              |              |              |
|----|--------------|--------------|--------------|
| C  | -2.097068000 | 1.063721000  | 0.935106000  |
| C  | -1.461584000 | 1.938088000  | 2.002430000  |
| O  | -1.217365000 | 0.718063000  | -0.131348000 |
| H  | -2.929244000 | 1.637160000  | 0.515350000  |
| H  | -2.239946000 | 2.370788000  | 2.638999000  |
| C  | -2.724654000 | -0.205245000 | 1.497253000  |
| H  | -3.074198000 | -0.852213000 | 0.688694000  |
| H  | -2.056056000 | -0.761735000 | 2.156692000  |
| Cl | -4.179367000 | 0.172385000  | 2.521476000  |
| H  | -0.912098000 | 2.753680000  | 1.525598000  |
| H  | -0.781932000 | 1.377009000  | 2.652813000  |
| C  | -3.076981000 | 0.900204000  | -1.849212000 |
| C  | -1.668375000 | 1.355412000  | -1.602920000 |
| C  | -3.939334000 | 1.915067000  | -1.766568000 |
| C  | -3.218920000 | 3.149063000  | -1.352756000 |
| O  | -3.723080000 | 4.251773000  | -1.188578000 |
| O  | -1.929487000 | 2.873388000  | -1.172483000 |
| O  | -0.780857000 | 1.204312000  | -2.427537000 |
| H  | -3.270392000 | -0.129494000 | -2.137860000 |
| H  | -5.004523000 | 1.914319000  | -1.968587000 |

72

A\_INT6 E = -3035.3550774

|    |              |              |              |
|----|--------------|--------------|--------------|
| Al | 1.087555000  | -0.766879000 | -0.187010000 |
| O  | 0.533226000  | -2.090380000 | -1.320722000 |
| O  | 2.291840000  | 0.037287000  | -1.295196000 |
| N  | -0.364348000 | -1.282057000 | 1.175362000  |
| N  | 1.124081000  | 0.839205000  | 1.054428000  |
| C  | -0.574648000 | -2.765455000 | -1.353037000 |
| C  | 2.387511000  | 1.318792000  | -1.552026000 |
| C  | 2.860314000  | 1.716427000  | -2.823255000 |
| C  | -0.926139000 | -3.413784000 | -2.566363000 |
| C  | -0.186610000 | -0.649517000 | 2.353656000  |
| C  | -1.184299000 | -2.351342000 | 1.076903000  |
| C  | 0.604037000  | 0.590844000  | 2.271634000  |
| C  | -2.095871000 | -4.134110000 | -2.702648000 |
| C  | 1.655852000  | 2.045167000  | 0.764830000  |
| C  | -2.647543000 | -3.664088000 | -0.418265000 |
| C  | -1.457789000 | -2.931430000 | -0.235471000 |
| C  | -2.982992000 | -4.256567000 | -1.623516000 |
| C  | -0.782296000 | -1.101089000 | 3.526835000  |
| C  | 2.070249000  | 2.342831000  | -0.605934000 |
| C  | 0.705706000  | 1.498585000  | 3.315163000  |
| C  | -1.780375000 | -2.867397000 | 2.246564000  |
| C  | -1.569937000 | -2.246375000 | 3.463579000  |

|    |              |              |              |
|----|--------------|--------------|--------------|
| C  | 2.944298000  | 3.049361000  | -3.183679000 |
| C  | 1.326922000  | 2.718247000  | 3.062912000  |
| C  | 2.139467000  | 3.688956000  | -1.015107000 |
| C  | 1.782638000  | 3.001130000  | 1.792159000  |
| C  | 2.562154000  | 4.051382000  | -2.283413000 |
| H  | -0.234525000 | -3.296266000 | -3.395537000 |
| H  | -2.334269000 | -4.596293000 | -3.658691000 |
| H  | -3.920472000 | -4.794659000 | -1.729174000 |
| H  | -3.350619000 | -3.734937000 | 0.409145000  |
| H  | 3.124146000  | 0.923910000  | -3.517843000 |
| H  | 3.289170000  | 3.314925000  | -4.181429000 |
| H  | 2.577823000  | 5.097618000  | -2.574655000 |
| H  | 1.788025000  | 4.460323000  | -0.334491000 |
| H  | 2.229128000  | 3.963120000  | 1.575346000  |
| H  | 1.415346000  | 3.461758000  | 3.849483000  |
| H  | 0.270164000  | 1.285518000  | 4.284755000  |
| H  | -0.624212000 | -0.581743000 | 4.464796000  |
| H  | -2.020664000 | -2.650558000 | 4.366377000  |
| H  | -2.383101000 | -3.766076000 | 2.189343000  |
| C  | 3.565634000  | -1.798595000 | 0.958647000  |
| C  | 4.207899000  | -0.462489000 | 1.315383000  |
| O  | 2.184972000  | -1.743271000 | 0.865946000  |
| H  | 3.838871000  | -2.524380000 | 1.750122000  |
| H  | 5.288884000  | -0.564861000 | 1.459999000  |
| C  | 4.085905000  | -2.361955000 | -0.360685000 |
| H  | 3.563610000  | -3.288416000 | -0.603979000 |
| H  | 3.961497000  | -1.643074000 | -1.173577000 |
| Cl | 5.863733000  | -2.781636000 | -0.297685000 |
| H  | 3.768861000  | -0.075636000 | 2.241405000  |
| H  | 4.035371000  | 0.273718000  | 0.523048000  |
| C  | -3.650417000 | 0.782924000  | -0.060248000 |
| C  | -3.834850000 | 0.392205000  | 1.384777000  |
| O  | -2.401078000 | 0.199400000  | -0.494376000 |
| H  | -3.593258000 | 1.871516000  | -0.160178000 |
| H  | -4.785416000 | 0.773149000  | 1.767061000  |
| C  | -4.676441000 | 0.204110000  | -1.018296000 |
| H  | -4.452313000 | 0.491701000  | -2.047507000 |
| H  | -4.705532000 | -0.886451000 | -0.949174000 |
| Cl | -6.335236000 | 0.807992000  | -0.659770000 |
| H  | -3.017018000 | 0.821637000  | 1.967962000  |
| H  | -3.825187000 | -0.699160000 | 1.490627000  |
| C  | -1.744200000 | 2.247634000  | -1.721360000 |
| C  | -1.435680000 | 0.971564000  | -1.017352000 |
| C  | -1.602494000 | 3.439972000  | -1.134812000 |

|   |              |             |              |
|---|--------------|-------------|--------------|
| C | -1.222049000 | 3.514723000 | 0.326980000  |
| O | -0.780617000 | 4.600244000 | 0.757734000  |
| O | -1.376617000 | 2.412595000 | 0.943681000  |
| O | -0.322399000 | 0.466864000 | -1.147900000 |
| H | -1.941893000 | 2.137846000 | -2.787808000 |
| H | -1.701561000 | 4.361234000 | -1.706742000 |

52

A\_INT7 E = -2002.6408086

|    |              |              |              |
|----|--------------|--------------|--------------|
| Al | -0.190088000 | -0.113555000 | -0.273983000 |
| O  | -1.304240000 | -0.897821000 | -1.446622000 |
| O  | 1.213838000  | -1.004255000 | -0.961169000 |
| N  | -1.620827000 | 1.310428000  | -0.002597000 |
| N  | 0.966341000  | 1.571755000  | -0.171986000 |
| C  | -2.595395000 | -1.086638000 | -1.300303000 |
| C  | 2.436531000  | -0.704494000 | -1.300933000 |
| C  | 3.213282000  | -1.702234000 | -1.933821000 |
| C  | -3.169050000 | -2.227102000 | -1.904379000 |
| C  | -1.148521000 | 2.494255000  | 0.440213000  |
| C  | -2.958218000 | 1.077931000  | -0.074575000 |
| C  | 0.318250000  | 2.610148000  | 0.418576000  |
| C  | -4.508618000 | -2.524263000 | -1.754804000 |
| C  | 2.323578000  | 1.617909000  | -0.327252000 |
| C  | -4.809019000 | -0.541526000 | -0.436358000 |
| C  | -3.447736000 | -0.193066000 | -0.583830000 |
| C  | -5.339846000 | -1.685346000 | -0.997997000 |
| C  | -1.985276000 | 3.522742000  | 0.848938000  |
| C  | 3.032232000  | 0.565320000  | -1.038737000 |
| C  | 0.984483000  | 3.704103000  | 0.948070000  |
| C  | -3.844684000 | 2.108565000  | 0.310069000  |
| C  | -3.361474000 | 3.312498000  | 0.777570000  |
| C  | 4.508257000  | -1.455496000 | -2.338361000 |
| C  | 2.374897000  | 3.732246000  | 0.866226000  |
| C  | 4.356507000  | 0.783995000  | -1.486207000 |
| C  | 3.034829000  | 2.706342000  | 0.226384000  |
| C  | 5.087465000  | -0.194493000 | -2.128220000 |
| H  | -2.502504000 | -2.872752000 | -2.467233000 |
| H  | -4.914830000 | -3.422371000 | -2.212971000 |
| H  | -6.386411000 | -1.930830000 | -0.849747000 |
| H  | -5.460450000 | 0.090285000  | 0.159833000  |
| H  | 2.738925000  | -2.664752000 | -2.097240000 |
| H  | 5.076582000  | -2.239232000 | -2.832409000 |
| H  | 6.095157000  | 0.015658000  | -2.471354000 |
| H  | 4.810409000  | 1.761614000  | -1.357326000 |
| H  | 4.115387000  | 2.714508000  | 0.174926000  |

|    |              |              |             |
|----|--------------|--------------|-------------|
| H  | 2.934582000  | 4.552687000  | 1.305129000 |
| H  | 0.439311000  | 4.503256000  | 1.434790000 |
| H  | -1.585598000 | 4.469428000  | 1.191190000 |
| H  | -4.050192000 | 4.099736000  | 1.069167000 |
| H  | -4.912291000 | 1.960789000  | 0.211592000 |
| C  | 0.454579000  | -1.370325000 | 2.226729000 |
| C  | 1.821910000  | -0.725091000 | 2.390074000 |
| O  | -0.382446000 | -0.633348000 | 1.383217000 |
| H  | -0.024583000 | -1.426330000 | 3.218798000 |
| H  | 2.434196000  | -1.260415000 | 3.121619000 |
| C  | 0.537204000  | -2.789501000 | 1.676367000 |
| H  | -0.466107000 | -3.190222000 | 1.520019000 |
| H  | 1.089014000  | -2.812828000 | 0.732546000 |
| Cl | 1.378472000  | -3.916036000 | 2.813251000 |
| H  | 1.707836000  | 0.311203000  | 2.725888000 |
| H  | 2.365877000  | -0.721365000 | 1.437333000 |

20

anion E = -1032.6666424

|    |              |              |              |
|----|--------------|--------------|--------------|
| C  | 0.943081000  | 0.186581000  | 0.451244000  |
| C  | 1.238773000  | -0.218801000 | 1.873146000  |
| O  | 0.206428000  | 1.423380000  | 0.493715000  |
| H  | 0.344329000  | -0.585602000 | -0.037161000 |
| H  | 1.832823000  | -1.136865000 | 1.893738000  |
| C  | 2.164097000  | 0.521984000  | -0.388245000 |
| H  | 1.867982000  | 0.829442000  | -1.393658000 |
| H  | 2.753713000  | 1.317686000  | 0.074527000  |
| Cl | 3.272081000  | -0.892159000 | -0.591678000 |
| H  | 0.287034000  | -0.398982000 | 2.376184000  |
| H  | 1.792194000  | 0.570139000  | 2.395119000  |
| C  | -1.309956000 | 0.653865000  | -1.310003000 |
| C  | -0.980502000 | 1.561092000  | -0.173116000 |
| C  | -1.901120000 | -0.544440000 | -1.228478000 |
| C  | -2.230961000 | -1.217098000 | 0.092749000  |
| O  | -2.888056000 | -2.280601000 | 0.017932000  |
| O  | -1.786971000 | -0.608000000 | 1.109081000  |
| O  | -1.620175000 | 2.571131000  | 0.038078000  |
| H  | -1.147187000 | 1.128213000  | -2.279777000 |
| H  | -2.186549000 | -1.063716000 | -2.144680000 |

62

A\_INT8 E = -2195.7540893

|    |              |              |              |
|----|--------------|--------------|--------------|
| Al | -0.085580000 | 0.412198000  | 0.038734000  |
| O  | -1.308391000 | 1.216544000  | 1.090546000  |
| O  | 1.324732000  | 0.947247000  | 1.029333000  |
| N  | -1.554300000 | -0.692636000 | -0.862124000 |

|   |              |              |              |
|---|--------------|--------------|--------------|
| N | 1.004992000  | -1.155899000 | -0.681329000 |
| C | -2.605134000 | 1.131012000  | 1.178906000  |
| C | 2.390769000  | 0.317411000  | 1.440708000  |
| C | 3.097635000  | 0.855437000  | 2.541404000  |
| C | -3.236759000 | 1.863280000  | 2.214393000  |
| C | -1.047459000 | -1.468206000 | -1.847685000 |
| C | -2.883305000 | -0.420960000 | -0.806963000 |
| C | 0.393507000  | -1.759176000 | -1.725393000 |
| C | -4.599978000 | 1.812607000  | 2.415418000  |
| C | 2.294973000  | -1.443411000 | -0.370283000 |
| C | -4.819306000 | 0.316323000  | 0.554014000  |
| C | -3.427538000 | 0.349540000  | 0.305157000  |
| C | -5.407887000 | 1.022069000  | 1.584344000  |
| C | -1.838570000 | -1.995400000 | -2.857700000 |
| C | 2.908334000  | -0.860030000 | 0.815637000  |
| C | 1.062299000  | -2.639487000 | -2.564587000 |
| C | -3.718206000 | -0.912466000 | -1.836864000 |
| C | -3.197818000 | -1.686167000 | -2.852547000 |
| C | 4.229839000  | 0.246635000  | 3.042978000  |
| C | 2.409100000  | -2.894638000 | -2.308775000 |
| C | 4.062763000  | -1.460626000 | 1.366133000  |
| C | 3.019225000  | -2.312392000 | -1.216755000 |
| C | 4.716828000  | -0.934057000 | 2.462798000  |
| H | -2.590793000 | 2.461516000  | 2.849497000  |
| H | -5.046032000 | 2.381072000  | 3.227729000  |
| H | -6.478387000 | 0.956375000  | 1.749445000  |
| H | -5.453930000 | -0.313429000 | -0.062132000 |
| H | 2.699233000  | 1.763817000  | 2.982357000  |
| H | 4.739367000  | 0.681241000  | 3.899353000  |
| H | 5.591154000  | -1.432355000 | 2.868908000  |
| H | 4.434184000  | -2.386944000 | 0.936398000  |
| H | 4.068621000  | -2.494822000 | -1.022327000 |
| H | 2.974992000  | -3.550086000 | -2.964213000 |
| H | 0.555914000  | -3.113083000 | -3.396859000 |
| H | -1.411446000 | -2.609616000 | -3.641002000 |
| H | -3.843726000 | -2.047078000 | -3.647484000 |
| H | -4.768874000 | -0.653321000 | -1.845525000 |
| C | 0.932465000  | 2.274669000  | -1.918735000 |
| C | 2.304606000  | 1.641084000  | -2.100944000 |
| O | -0.021744000 | 1.372514000  | -1.449029000 |
| H | 0.596562000  | 2.652361000  | -2.900744000 |
| H | 3.013372000  | 2.343710000  | -2.549460000 |
| C | 0.958419000  | 3.460864000  | -0.960630000 |
| H | -0.050406000 | 3.853652000  | -0.823180000 |

|    |              |              |              |
|----|--------------|--------------|--------------|
| H  | 1.372340000  | 3.173051000  | 0.009393000  |
| Cl | 1.968673000  | 4.829403000  | -1.584172000 |
| H  | 2.227202000  | 0.764832000  | -2.753807000 |
| H  | 2.714664000  | 1.318389000  | -1.136645000 |
| C  | -0.369454000 | -2.590940000 | 2.179271000  |
| C  | -0.627740000 | -3.574764000 | 1.081837000  |
| O  | -0.268530000 | -1.207810000 | 1.814321000  |
| H  | 0.393647000  | -2.875227000 | 2.906580000  |
| H  | -0.963672000 | -4.528291000 | 1.500135000  |
| C  | -1.377134000 | -1.620615000 | 2.608549000  |
| H  | -1.376932000 | -1.224958000 | 3.622717000  |
| H  | -2.340141000 | -1.596461000 | 2.095363000  |
| H  | 0.279982000  | -3.769586000 | 0.501627000  |
| H  | -1.402026000 | -3.206974000 | 0.401947000  |

82

A\_TS4 E = -3228.4439556 Imaginary Frequency= 432.4393

|    |              |              |              |
|----|--------------|--------------|--------------|
| Al | 1.802484000  | 0.162951000  | 0.171528000  |
| O  | 2.743946000  | 1.474745000  | 1.040949000  |
| O  | 2.508038000  | -1.306296000 | 1.008287000  |
| N  | 0.689898000  | 1.553146000  | -0.860194000 |
| N  | 0.476897000  | -1.061279000 | -0.871097000 |
| C  | 2.359613000  | 2.685506000  | 1.305983000  |
| C  | 1.965447000  | -2.463878000 | 1.252995000  |
| C  | 2.450780000  | -3.212547000 | 2.353945000  |
| C  | 2.934501000  | 3.347780000  | 2.421827000  |
| C  | 0.076025000  | 1.035867000  | -1.943927000 |
| C  | 0.821986000  | 2.889429000  | -0.705583000 |
| C  | -0.062986000 | -0.435582000 | -1.940348000 |
| C  | 2.572730000  | 4.630399000  | 2.779698000  |
| C  | 0.386236000  | -2.404268000 | -0.737136000 |
| C  | 1.070112000  | 4.731215000  | 0.915547000  |
| C  | 1.419458000  | 3.425452000  | 0.513255000  |
| C  | 1.618117000  | 5.336123000  | 2.031819000  |
| C  | -0.407902000 | 1.840091000  | -2.968325000 |
| C  | 0.930286000  | -3.053959000 | 0.454143000  |
| C  | -0.720448000 | -1.133785000 | -2.946373000 |
| C  | 0.378241000  | 3.743204000  | -1.739572000 |
| C  | -0.224212000 | 3.217144000  | -2.863746000 |
| C  | 1.918572000  | -4.439544000 | 2.696329000  |
| C  | -0.782124000 | -2.523035000 | -2.853341000 |
| C  | 0.406083000  | -4.305505000 | 0.842366000  |
| C  | -0.232819000 | -3.158547000 | -1.757822000 |
| C  | 0.873544000  | -4.995626000 | 1.945222000  |
| H  | 3.659724000  | 2.782674000  | 2.999777000  |

|    |              |              |              |
|----|--------------|--------------|--------------|
| H  | 3.021245000  | 5.089143000  | 3.658629000  |
| H  | 1.302206000  | 6.331862000  | 2.327934000  |
| H  | 0.307666000  | 5.264659000  | 0.351311000  |
| H  | 3.248696000  | -2.759586000 | 2.934737000  |
| H  | 2.303557000  | -4.967637000 | 3.565956000  |
| H  | 0.423388000  | -5.941102000 | 2.230650000  |
| H  | -0.427363000 | -4.722529000 | 0.281700000  |
| H  | -0.251897000 | -4.239592000 | -1.687686000 |
| H  | -1.259794000 | -3.103098000 | -3.638349000 |
| H  | -1.161436000 | -0.615219000 | -3.789930000 |
| H  | -0.901039000 | 1.410834000  | -3.832932000 |
| H  | -0.561138000 | 3.874416000  | -3.660601000 |
| H  | 0.542142000  | 4.811057000  | -1.654870000 |
| C  | 3.898310000  | -0.577576000 | -1.767000000 |
| C  | 3.551357000  | -2.038065000 | -2.038221000 |
| O  | 2.817174000  | 0.175884000  | -1.348384000 |
| H  | 4.285943000  | -0.148441000 | -2.712563000 |
| H  | 4.405008000  | -2.583515000 | -2.454630000 |
| C  | 5.003883000  | -0.423567000 | -0.726518000 |
| H  | 5.196679000  | 0.632818000  | -0.536237000 |
| H  | 4.741075000  | -0.921883000 | 0.209430000  |
| Cl | 6.590780000  | -1.142329000 | -1.274791000 |
| H  | 2.724027000  | -2.092677000 | -2.754726000 |
| H  | 3.241426000  | -2.544197000 | -1.117308000 |
| C  | -0.942331000 | 0.501057000  | 1.504669000  |
| C  | -1.501164000 | 1.738723000  | 2.147844000  |
| O  | 0.461037000  | 0.356777000  | 1.616213000  |
| H  | -1.327732000 | 0.344850000  | 0.482601000  |
| H  | -2.590853000 | 1.663559000  | 2.231231000  |
| C  | -0.803038000 | -0.708158000 | 2.295964000  |
| H  | -0.602653000 | -1.655917000 | 1.821255000  |
| H  | -0.626446000 | -0.614563000 | 3.357505000  |
| H  | -1.255132000 | 2.626211000  | 1.557691000  |
| H  | -1.080543000 | 1.861908000  | 3.150382000  |
| C  | -4.579297000 | 0.733597000  | -0.183843000 |
| C  | -5.436120000 | 1.498172000  | 0.793373000  |
| O  | -5.408118000 | -0.291009000 | -0.772785000 |
| H  | -3.724288000 | 0.287606000  | 0.331143000  |
| H  | -4.868467000 | 2.320128000  | 1.237264000  |
| C  | -4.080021000 | 1.539455000  | -1.371779000 |
| H  | -3.450497000 | 0.922316000  | -2.020934000 |
| H  | -4.915621000 | 1.939759000  | -1.951247000 |
| Cl | -3.073118000 | 2.937195000  | -0.852914000 |
| H  | -5.753546000 | 0.815815000  | 1.583955000  |

|   |              |              |              |
|---|--------------|--------------|--------------|
| H | -6.315962000 | 1.912562000  | 0.290219000  |
| C | -3.629018000 | -2.017615000 | -0.586300000 |
| C | -5.027425000 | -1.590507000 | -0.865219000 |
| C | -3.002270000 | -2.086715000 | 0.595283000  |
| C | -3.587414000 | -1.570480000 | 1.888582000  |
| O | -2.761289000 | -1.320108000 | 2.830277000  |
| O | -4.823326000 | -1.409361000 | 1.916648000  |
| O | -5.820541000 | -2.379745000 | -1.334711000 |
| H | -3.152271000 | -2.445838000 | -1.467624000 |
| H | -2.011758000 | -2.543157000 | 0.621754000  |

82

A\_INT9 E = -3228.4823328

|    |              |              |              |
|----|--------------|--------------|--------------|
| A1 | 1.846881000  | -0.104967000 | 0.217914000  |
| O  | 3.152197000  | 0.790996000  | 1.164141000  |
| O  | 2.154101000  | -1.833814000 | 0.823894000  |
| N  | 1.269159000  | 1.623953000  | -0.750705000 |
| N  | 0.297921000  | -0.808409000 | -0.983278000 |
| C  | 3.142307000  | 2.036290000  | 1.512022000  |
| C  | 1.254655000  | -2.741521000 | 1.032081000  |
| C  | 1.471295000  | -3.677084000 | 2.079644000  |
| C  | 3.880377000  | 2.419497000  | 2.665627000  |
| C  | 0.548589000  | 1.398612000  | -1.865066000 |
| C  | 1.768924000  | 2.847670000  | -0.473499000 |
| C  | -0.043190000 | 0.046234000  | -1.967760000 |
| C  | 3.914504000  | 3.720720000  | 3.121001000  |
| C  | -0.245995000 | -2.042745000 | -0.906164000 |
| C  | 2.526606000  | 4.397468000  | 1.288691000  |
| C  | 2.475505000  | 3.081768000  | 0.783136000  |
| C  | 3.218513000  | 4.730800000  | 2.439084000  |
| C  | 0.329677000  | 2.392335000  | -2.812633000 |
| C  | 0.068683000  | -2.904665000 | 0.235023000  |
| C  | -0.946654000 | -0.309243000 | -2.965999000 |
| C  | 1.587368000  | 3.884701000  | -1.416383000 |
| C  | 0.879907000  | 3.650757000  | -2.579402000 |
| C  | 0.573764000  | -4.683955000 | 2.366741000  |
| C  | -1.462414000 | -1.603760000 | -2.953143000 |
| C  | -0.820055000 | -3.953406000 | 0.558956000  |
| C  | -1.113912000 | -2.471452000 | -1.934995000 |
| C  | -0.597595000 | -4.827674000 | 1.607223000  |
| H  | 4.399035000  | 1.622910000  | 3.191151000  |
| H  | 4.472613000  | 3.959605000  | 4.024572000  |
| H  | 3.209588000  | 5.751590000  | 2.809895000  |
| H  | 1.966493000  | 5.176038000  | 0.775149000  |
| H  | 2.378320000  | -3.544655000 | 2.661987000  |



|    |              |              |              |
|----|--------------|--------------|--------------|
| H  | 0.771655000  | -5.362477000 | 3.194089000  |
| H  | -1.323575000 | -5.601034000 | 1.839063000  |
| H  | -1.741877000 | -4.056971000 | -0.010734000 |
| H  | -1.488729000 | -3.488843000 | -1.935175000 |
| H  | -2.136439000 | -1.931197000 | -3.741313000 |
| H  | -1.240624000 | 0.400594000  | -3.731176000 |
| H  | -0.250170000 | 2.196774000  | -3.706847000 |
| H  | 0.755545000  | 4.444696000  | -3.311299000 |
| H  | 2.039379000  | 4.853523000  | -1.238965000 |
| C  | 3.688555000  | -1.246234000 | -1.832588000 |
| C  | 2.914941000  | -2.490894000 | -2.262814000 |
| O  | 2.893023000  | -0.249229000 | -1.310234000 |
| H  | 4.207317000  | -0.858241000 | -2.734029000 |
| H  | 3.569051000  | -3.221456000 | -2.751832000 |
| C  | 4.774824000  | -1.560313000 | -0.807054000 |
| H  | 5.275841000  | -0.641853000 | -0.499257000 |
| H  | 4.363890000  | -2.066586000 | 0.068695000  |
| Cl | 6.083828000  | -2.654224000 | -1.474991000 |
| H  | 2.126012000  | -2.206780000 | -2.968794000 |
| H  | 2.444397000  | -2.976640000 | -1.401254000 |
| C  | -0.723563000 | 0.495600000  | 1.638419000  |
| C  | -1.030659000 | 1.982199000  | 1.823032000  |
| O  | 0.609865000  | 0.227393000  | 1.562142000  |
| H  | -1.291998000 | 0.161616000  | 0.729622000  |
| H  | -2.100859000 | 2.166287000  | 1.985026000  |
| C  | -1.254047000 | -0.332905000 | 2.813618000  |
| H  | -1.045676000 | -1.398526000 | 2.656220000  |
| H  | -0.753303000 | -0.021412000 | 3.733034000  |
| H  | -0.715942000 | 2.544922000  | 0.938128000  |
| H  | -0.472809000 | 2.372121000  | 2.682423000  |
| C  | -4.577533000 | 1.184937000  | -0.450988000 |
| C  | -5.104314000 | 2.414160000  | 0.244848000  |
| O  | -5.638242000 | 0.198873000  | -0.443766000 |
| H  | -3.691010000 | 0.804315000  | 0.065941000  |
| H  | -4.345734000 | 3.200620000  | 0.245926000  |
| C  | -4.243164000 | 1.376051000  | -1.920324000 |
| H  | -3.893710000 | 0.437317000  | -2.360314000 |
| H  | -5.112453000 | 1.736836000  | -2.475816000 |
| Cl | -2.922599000 | 2.571309000  | -2.136380000 |
| H  | -5.356517000 | 2.165056000  | 1.277039000  |
| H  | -5.999143000 | 2.789466000  | -0.261605000 |
| C  | -4.051523000 | -1.630734000 | 0.076451000  |
| C  | -5.426304000 | -1.102185000 | -0.146728000 |
| C  | -3.238393000 | -1.418873000 | 1.120570000  |

|   |              |              |              |
|---|--------------|--------------|--------------|
| C | -3.607030000 | -0.491897000 | 2.217634000  |
| O | -2.665741000 | -0.118345000 | 3.091803000  |
| O | -4.749930000 | -0.079172000 | 2.348050000  |
| O | -6.365923000 | -1.867574000 | -0.175196000 |
| H | -3.752014000 | -2.358519000 | -0.676534000 |
| H | -2.297169000 | -1.958329000 | 1.169057000  |

72

A\_INT10 E = -3035.3653

|    |              |              |              |
|----|--------------|--------------|--------------|
| Al | 1.238651000  | -0.171050000 | 0.053191000  |
| O  | 1.751486000  | 1.214756000  | 1.140993000  |
| O  | -0.090498000 | -0.807315000 | 1.155765000  |
| N  | 2.608047000  | 0.331321000  | -1.379115000 |
| N  | 0.658891000  | -1.466926000 | -1.436312000 |
| C  | 2.819950000  | 1.943091000  | 1.109265000  |
| C  | -1.224221000 | -1.361456000 | 0.836362000  |
| C  | -2.290509000 | -1.275230000 | 1.767476000  |
| C  | 3.105360000  | 2.726175000  | 2.261982000  |
| C  | 2.539216000  | -0.435971000 | -2.485876000 |
| C  | 3.536548000  | 1.313796000  | -1.266053000 |
| C  | 1.520413000  | -1.507567000 | -2.468949000 |
| C  | 4.224050000  | 3.523051000  | 2.354860000  |
| C  | -0.416602000 | -2.286064000 | -1.393232000 |
| C  | 4.870216000  | 2.848303000  | 0.146905000  |
| C  | 3.724176000  | 2.033003000  | -0.005401000 |
| C  | 5.133177000  | 3.581240000  | 1.287514000  |
| C  | 3.350628000  | -0.215360000 | -3.592724000 |
| C  | -1.450645000 | -2.086876000 | -0.378041000 |
| C  | 1.428276000  | -2.475834000 | -3.464412000 |
| C  | 4.330396000  | 1.614624000  | -2.398844000 |
| C  | 4.236737000  | 0.856972000  | -3.546800000 |
| C  | -3.531087000 | -1.822111000 | 1.512026000  |
| C  | 0.404623000  | -3.415040000 | -3.371426000 |
| C  | -2.738390000 | -2.617506000 | -0.607425000 |
| C  | -0.523700000 | -3.315147000 | -2.353393000 |
| C  | -3.770368000 | -2.491873000 | 0.303617000  |
| H  | 2.393337000  | 2.650784000  | 3.078799000  |
| H  | 4.406898000  | 4.095303000  | 3.262120000  |
| H  | 6.036678000  | 4.179935000  | 1.355419000  |
| H  | 5.605603000  | 2.884135000  | -0.650551000 |
| H  | -2.087661000 | -0.734469000 | 2.688078000  |
| H  | -4.334123000 | -1.709412000 | 2.236909000  |
| H  | -4.758330000 | -2.877962000 | 0.072182000  |
| H  | -2.944584000 | -3.105342000 | -1.556700000 |
| H  | -1.324358000 | -4.040619000 | -2.275325000 |

|    |              |              |              |
|----|--------------|--------------|--------------|
| H  | 0.329468000  | -4.216590000 | -4.101398000 |
| H  | 2.144352000  | -2.513861000 | -4.276783000 |
| H  | 3.265876000  | -0.831051000 | -4.480041000 |
| H  | 4.848831000  | 1.100756000  | -4.411097000 |
| H  | 5.006262000  | 2.458994000  | -2.376501000 |
| C  | 2.633234000  | -2.369660000 | 1.467685000  |
| C  | 1.722214000  | -3.542561000 | 1.118950000  |
| O  | 2.562478000  | -1.332639000 | 0.559490000  |
| H  | 3.672945000  | -2.755028000 | 1.492997000  |
| H  | 1.868151000  | -4.386151000 | 1.802575000  |
| C  | 2.345686000  | -1.792568000 | 2.850965000  |
| H  | 2.993358000  | -0.934792000 | 3.040966000  |
| H  | 1.300041000  | -1.492444000 | 2.946738000  |
| Cl | 2.674492000  | -2.985289000 | 4.198154000  |
| H  | 1.937542000  | -3.880537000 | 0.098843000  |
| H  | 0.668937000  | -3.245258000 | 1.163701000  |
| C  | -4.648980000 | 1.314295000  | -0.292563000 |
| C  | -4.847317000 | 0.774853000  | -1.686796000 |
| O  | -4.451753000 | 2.744082000  | -0.386451000 |
| H  | -3.779264000 | 0.839668000  | 0.177849000  |
| H  | -4.996861000 | -0.307841000 | -1.652719000 |
| C  | -5.871043000 | 1.228274000  | 0.614854000  |
| H  | -5.613379000 | 1.502172000  | 1.640898000  |
| H  | -6.643447000 | 1.907453000  | 0.247494000  |
| Cl | -6.632099000 | -0.404247000 | 0.691795000  |
| H  | -3.953297000 | 0.993293000  | -2.273544000 |
| H  | -5.719789000 | 1.236194000  | -2.162026000 |
| C  | -2.451501000 | 2.661326000  | 1.074342000  |
| C  | -3.367286000 | 3.373256000  | 0.136414000  |
| C  | -1.383990000 | 1.925919000  | 0.744372000  |
| C  | -1.069056000 | 1.603020000  | -0.685903000 |
| O  | 0.033683000  | 0.982556000  | -0.920254000 |
| O  | -1.880044000 | 1.959925000  | -1.554386000 |
| O  | -3.265534000 | 4.568328000  | -0.041613000 |
| H  | -2.629827000 | 2.915269000  | 2.119376000  |
| H  | -0.704859000 | 1.562634000  | 1.512247000  |

81

A\_TS5 E = -3414.6176935 Imaginary Frequency = 212.6543

|    |              |              |              |
|----|--------------|--------------|--------------|
| Al | -0.319195000 | -0.338570000 | -0.530492000 |
| O  | -0.842184000 | -1.483776000 | -1.812014000 |
| O  | 0.066193000  | 1.143256000  | -1.456814000 |
| N  | -0.745494000 | -1.775117000 | 0.869601000  |
| N  | 0.271144000  | 0.594477000  | 1.208804000  |
| C  | -1.821287000 | -2.335962000 | -1.785917000 |

|    |              |              |              |
|----|--------------|--------------|--------------|
| C  | -0.029213000 | 2.390512000  | -1.071207000 |
| C  | -0.457249000 | 3.363750000  | -1.999015000 |
| C  | -2.510138000 | -2.623522000 | -2.989761000 |
| C  | -0.064854000 | -1.613275000 | 2.025297000  |
| C  | -1.464900000 | -2.899534000 | 0.638761000  |
| C  | 0.563782000  | -0.289758000 | 2.189550000  |
| C  | -3.575606000 | -3.500120000 | -3.016259000 |
| C  | 0.744328000  | 1.866724000  | 1.264324000  |
| C  | -3.316649000 | -3.914680000 | -0.664477000 |
| C  | -2.214885000 | -3.036186000 | -0.602037000 |
| C  | -4.003925000 | -4.142998000 | -1.842889000 |
| C  | -0.047814000 | -2.588493000 | 3.013085000  |
| C  | 0.348303000  | 2.819061000  | 0.235951000  |
| C  | 1.373226000  | 0.042881000  | 3.266663000  |
| C  | -1.470042000 | -3.920058000 | 1.613248000  |
| C  | -0.762280000 | -3.763835000 | 2.788486000  |
| C  | -0.516337000 | 4.700625000  | -1.655345000 |
| C  | 1.909952000  | 1.327490000  | 3.314779000  |
| C  | 0.293900000  | 4.192108000  | 0.547358000  |
| C  | 1.588344000  | 2.237931000  | 2.328332000  |
| C  | -0.132795000 | 5.129472000  | -0.376024000 |
| H  | -2.194371000 | -2.077180000 | -3.872242000 |
| H  | -4.106543000 | -3.670021000 | -3.950345000 |
| H  | -4.866925000 | -4.801855000 | -1.854739000 |
| H  | -3.658438000 | -4.399061000 | 0.247854000  |
| H  | -0.781820000 | 3.005469000  | -2.970446000 |
| H  | -0.885981000 | 5.422692000  | -2.379523000 |
| H  | -0.200613000 | 6.177474000  | -0.099998000 |
| H  | 0.541309000  | 4.514617000  | 1.556525000  |
| H  | 2.036061000  | 3.224700000  | 2.329777000  |
| H  | 2.606772000  | 1.601538000  | 4.100398000  |
| H  | 1.624801000  | -0.693474000 | 4.020548000  |
| H  | 0.497711000  | -2.434045000 | 3.936279000  |
| H  | -0.760397000 | -4.554427000 | 3.533666000  |
| H  | -2.010400000 | -4.838364000 | 1.416191000  |
| C  | 6.156821000  | -0.724091000 | -0.424306000 |
| C  | 6.494420000  | -2.113463000 | 0.053048000  |
| O  | 5.994774000  | 0.102106000  | 0.752551000  |
| H  | 5.224904000  | -0.738174000 | -0.995207000 |
| H  | 6.653738000  | -2.779128000 | -0.798788000 |
| C  | 7.252227000  | -0.040947000 | -1.225199000 |
| H  | 6.955294000  | 0.973252000  | -1.501883000 |
| H  | 8.184484000  | 0.000875000  | -0.656307000 |
| Cl | 7.603440000  | -0.914630000 | -2.757009000 |

|    |              |              |              |
|----|--------------|--------------|--------------|
| H  | 5.662683000  | -2.493502000 | 0.647910000  |
| H  | 7.403010000  | -2.102993000 | 0.664025000  |
| C  | 4.104385000  | 1.298710000  | -0.299652000 |
| C  | 4.940080000  | 0.940484000  | 0.884542000  |
| C  | 3.034718000  | 0.638909000  | -0.760746000 |
| C  | 2.601589000  | -0.674573000 | -0.185518000 |
| O  | 1.427413000  | -1.092436000 | -0.511701000 |
| O  | 3.388150000  | -1.281989000 | 0.557135000  |
| O  | 4.790109000  | 1.511967000  | 1.945073000  |
| H  | 4.346532000  | 2.279571000  | -0.709543000 |
| H  | 2.421339000  | 1.070304000  | -1.547768000 |
| C  | -3.146991000 | 0.798703000  | 0.951817000  |
| C  | -2.667296000 | 2.110772000  | 1.533550000  |
| O  | -2.405666000 | 0.398899000  | -0.223598000 |
| H  | -4.181874000 | 0.933402000  | 0.632418000  |
| H  | -3.407088000 | 2.483520000  | 2.248369000  |
| C  | -3.168090000 | -0.346248000 | 1.950096000  |
| H  | -3.424985000 | -1.287234000 | 1.458306000  |
| H  | -2.234444000 | -0.453422000 | 2.504199000  |
| Cl | -4.437014000 | -0.067138000 | 3.212183000  |
| H  | -2.563482000 | 2.845831000  | 0.733408000  |
| H  | -1.715030000 | 2.006857000  | 2.062273000  |
| C  | -4.526549000 | -0.164682000 | -1.476084000 |
| C  | -3.227564000 | 0.572163000  | -1.578235000 |
| C  | -5.600438000 | 0.621159000  | -1.402049000 |
| C  | -5.238885000 | 2.072094000  | -1.310895000 |
| O  | -6.081964000 | 2.968635000  | -1.259514000 |
| O  | -3.942807000 | 2.221979000  | -1.279088000 |
| O  | -2.522589000 | 0.574490000  | -2.558654000 |
| H  | -4.514549000 | -1.250067000 | -1.558284000 |
| H  | -6.636089000 | 0.296995000  | -1.414114000 |

81

A\_INT11 E = -3414.6588341

|    |              |              |              |
|----|--------------|--------------|--------------|
| Al | 0.213294000  | 0.058128000  | 1.123632000  |
| O  | 1.127223000  | -0.957044000 | 2.311106000  |
| O  | -0.496383000 | 1.279585000  | 2.267812000  |
| N  | 0.749457000  | -1.179100000 | -0.433397000 |
| N  | -0.427923000 | 1.156054000  | -0.464492000 |
| C  | 1.972058000  | -1.930144000 | 2.140910000  |
| C  | -0.543517000 | 2.575351000  | 2.110385000  |
| C  | -0.538329000 | 3.390350000  | 3.267743000  |
| C  | 2.791746000  | -2.293846000 | 3.239485000  |
| C  | 0.069107000  | -0.889134000 | -1.564067000 |
| C  | 1.322390000  | -2.394734000 | -0.269966000 |

|    |              |              |              |
|----|--------------|--------------|--------------|
| C  | -0.474754000 | 0.475919000  | -1.627717000 |
| C  | 3.734075000  | -3.299693000 | 3.151274000  |
| C  | -0.771577000 | 2.465781000  | -0.415768000 |
| C  | 3.097032000  | -3.685170000 | 0.872664000  |
| C  | 2.120390000  | -2.671070000 | 0.925121000  |
| C  | 3.903676000  | -4.005763000 | 1.952516000  |
| C  | -0.109417000 | -1.815512000 | -2.583283000 |
| C  | -0.641946000 | 3.216934000  | 0.835331000  |
| C  | -0.950045000 | 1.042196000  | -2.800508000 |
| C  | 1.151593000  | -3.372619000 | -1.269368000 |
| C  | 0.433389000  | -3.084316000 | -2.414351000 |
| C  | -0.555309000 | 4.769538000  | 3.188524000  |
| C  | -1.371852000 | 2.363802000  | -2.760674000 |
| C  | -0.631789000 | 4.625658000  | 0.795160000  |
| C  | -1.277353000 | 3.075292000  | -1.579668000 |
| C  | -0.583552000 | 5.403155000  | 1.939585000  |
| H  | 2.651719000  | -1.728347000 | 4.156101000  |
| H  | 4.353174000  | -3.534747000 | 4.014778000  |
| H  | 4.658553000  | -4.781137000 | 1.861650000  |
| H  | 3.256023000  | -4.212848000 | -0.065053000 |
| H  | -0.492369000 | 2.876895000  | 4.223693000  |
| H  | -0.527451000 | 5.362027000  | 4.100896000  |
| H  | -0.557290000 | 6.486154000  | 1.863298000  |
| H  | -0.625068000 | 5.125031000  | -0.169776000 |
| H  | -1.608553000 | 4.105753000  | -1.543881000 |
| H  | -1.759727000 | 2.840942000  | -3.655654000 |
| H  | -0.978374000 | 0.473442000  | -3.720728000 |
| H  | -0.702255000 | -1.567161000 | -3.455346000 |
| H  | 0.276879000  | -3.850868000 | -3.168119000 |
| H  | 1.550712000  | -4.368000000 | -1.115828000 |
| C  | -6.006640000 | -1.554133000 | -0.180169000 |
| C  | -6.206512000 | -3.034940000 | 0.018021000  |
| O  | -5.413667000 | -1.377182000 | -1.488121000 |
| H  | -5.329357000 | -1.162152000 | 0.583342000  |
| H  | -6.681903000 | -3.227718000 | 0.983041000  |
| C  | -7.286641000 | -0.737312000 | -0.221771000 |
| H  | -7.069305000 | 0.316239000  | -0.411792000 |
| H  | -7.964688000 | -1.108997000 | -0.994208000 |
| Cl | -8.175772000 | -0.807732000 | 1.341374000  |
| H  | -5.232994000 | -3.526933000 | -0.001232000 |
| H  | -6.838913000 | -3.450577000 | -0.773389000 |
| C  | -3.997548000 | 0.442696000  | -0.616611000 |
| C  | -4.341198000 | -0.566740000 | -1.664251000 |
| C  | -3.121550000 | 0.256286000  | 0.376463000  |

|    |              |              |              |
|----|--------------|--------------|--------------|
| C  | -2.465688000 | -1.075121000 | 0.595016000  |
| O  | -1.304666000 | -1.069867000 | 1.147838000  |
| O  | -3.074176000 | -2.089137000 | 0.225052000  |
| O  | -3.773511000 | -0.587477000 | -2.735656000 |
| H  | -4.417569000 | 1.432020000  | -0.800317000 |
| H  | -2.824883000 | 1.086157000  | 1.016186000  |
| C  | 4.567859000  | -0.221169000 | -0.702111000 |
| C  | 4.174215000  | -1.170678000 | -1.807697000 |
| O  | 3.424298000  | -0.010500000 | 0.157613000  |
| H  | 4.889141000  | 0.741172000  | -1.116476000 |
| H  | 5.011713000  | -1.311236000 | -2.496097000 |
| C  | 5.614461000  | -0.767898000 | 0.253638000  |
| H  | 5.827908000  | -0.053304000 | 1.051074000  |
| H  | 5.277443000  | -1.711035000 | 0.694912000  |
| Cl | 7.172750000  | -1.093493000 | -0.588354000 |
| H  | 3.327510000  | -0.749702000 | -2.354022000 |
| H  | 3.899240000  | -2.147273000 | -1.394714000 |
| C  | 3.635050000  | 2.452332000  | 0.051287000  |
| C  | 2.851005000  | 1.200558000  | 0.249973000  |
| C  | 3.557701000  | 3.122929000  | -1.099199000 |
| C  | 2.741441000  | 2.510653000  | -2.213023000 |
| O  | 2.585341000  | 3.145334000  | -3.268618000 |
| O  | 2.295525000  | 1.350988000  | -1.902306000 |
| O  | 1.789410000  | 1.259849000  | 0.890849000  |
| H  | 4.166832000  | 2.815510000  | 0.930315000  |
| H  | 4.044726000  | 4.084159000  | -1.247879000 |

61

A\_INT12 E = -2381.9396082

|    |              |              |              |
|----|--------------|--------------|--------------|
| Al | -1.681062000 | 0.574860000  | -0.232787000 |
| O  | -3.000885000 | -0.072541000 | -1.241913000 |
| O  | -2.277083000 | 2.263024000  | -0.323901000 |
| N  | -1.849367000 | -1.003265000 | 1.021666000  |
| N  | -0.459747000 | 1.170490000  | 1.256683000  |
| C  | -3.852461000 | -1.053700000 | -1.130032000 |
| C  | -1.481087000 | 3.314009000  | -0.381996000 |
| C  | -1.895921000 | 4.421232000  | -1.150202000 |
| C  | -4.910010000 | -1.124630000 | -2.065519000 |
| C  | -0.895062000 | -1.030085000 | 1.993541000  |
| C  | -2.659558000 | -2.091674000 | 0.833997000  |
| C  | -0.132857000 | 0.214661000  | 2.149772000  |
| C  | -5.862669000 | -2.119010000 | -1.997160000 |
| C  | 0.166506000  | 2.375589000  | 1.264789000  |
| C  | -4.762576000 | -3.051507000 | -0.077446000 |
| C  | -3.753844000 | -2.060060000 | -0.124253000 |

|    |              |              |              |
|----|--------------|--------------|--------------|
| C  | -5.800991000 | -3.089361000 | -0.984946000 |
| C  | -0.662631000 | -2.144853000 | 2.780884000  |
| C  | -0.229839000 | 3.390519000  | 0.300511000  |
| C  | 0.848024000  | 0.405690000  | 3.110275000  |
| C  | -2.415387000 | -3.256863000 | 1.593849000  |
| C  | -1.426351000 | -3.285990000 | 2.552303000  |
| C  | -1.079114000 | 5.522937000  | -1.320495000 |
| C  | 1.505811000  | 1.633600000  | 3.138090000  |
| C  | 0.590443000  | 4.517540000  | 0.080995000  |
| C  | 1.159550000  | 2.616478000  | 2.234501000  |
| C  | 0.187597000  | 5.567665000  | -0.721409000 |
| H  | -4.942920000 | -0.353896000 | -2.828628000 |
| H  | -6.671112000 | -2.141094000 | -2.723367000 |
| H  | -6.564645000 | -3.856207000 | -0.906481000 |
| H  | -4.750899000 | -3.791652000 | 0.716039000  |
| H  | -2.866884000 | 4.353929000  | -1.630461000 |
| H  | -1.415649000 | 6.349441000  | -1.941254000 |
| H  | 0.847576000  | 6.413352000  | -0.885466000 |
| H  | 1.579499000  | 4.547291000  | 0.529340000  |
| H  | 1.657521000  | 3.576728000  | 2.264340000  |
| H  | 2.289897000  | 1.817246000  | 3.865778000  |
| H  | 1.106586000  | -0.377433000 | 3.812469000  |
| H  | 0.113575000  | -2.134635000 | 3.535792000  |
| H  | -1.243481000 | -4.192939000 | 3.120756000  |
| H  | -2.997889000 | -4.147215000 | 1.400291000  |
| C  | 4.018979000  | -1.735467000 | -0.410910000 |
| C  | 3.597318000  | -2.794958000 | 0.575219000  |
| O  | 4.137508000  | -0.495471000 | 0.333580000  |
| H  | 3.259507000  | -1.619804000 | -1.189447000 |
| H  | 3.514922000  | -3.763950000 | 0.077405000  |
| C  | 5.383118000  | -1.961951000 | -1.039663000 |
| H  | 5.662121000  | -1.121643000 | -1.679578000 |
| H  | 6.152641000  | -2.098219000 | -0.275857000 |
| Cl | 5.382230000  | -3.428140000 | -2.072348000 |
| H  | 2.624111000  | -2.529392000 | 0.992866000  |
| H  | 4.327173000  | -2.880531000 | 1.386243000  |
| C  | 3.196960000  | 0.772168000  | -1.572631000 |
| C  | 3.643135000  | 0.660151000  | -0.148905000 |
| C  | 1.952564000  | 0.561286000  | -2.017093000 |
| C  | 0.898439000  | 0.019383000  | -1.123365000 |
| O  | -0.306493000 | 0.419276000  | -1.411684000 |
| O  | 1.197774000  | -0.719396000 | -0.179360000 |
| O  | 3.657759000  | 1.647572000  | 0.555985000  |
| H  | 3.933994000  | 1.234589000  | -2.227380000 |



|              |               |              |              |
|--------------|---------------|--------------|--------------|
| H            | 1.666908000   | 0.854144000  | -3.023573000 |
| 81           |               |              |              |
| A_INT12' E = | -3414.6722844 |              |              |
| Al           | -0.500104000  | 0.742330000  | 1.400661000  |
| O            | -0.553047000  | 2.332119000  | 2.262070000  |
| O            | -0.507929000  | -0.352252000 | 2.870637000  |
| N            | -0.634239000  | 1.653234000  | -0.430813000 |
| N            | -0.206421000  | -0.876016000 | 0.193198000  |
| C            | -0.853571000  | 3.522380000  | 1.854950000  |
| C            | 0.249716000   | -1.395241000 | 3.055997000  |
| C            | 0.679633000   | -1.697800000 | 4.371614000  |
| C            | -1.014604000  | 4.522340000  | 2.852453000  |
| C            | -0.573381000  | 0.791183000  | -1.470678000 |
| C            | -0.830753000  | 2.982148000  | -0.640372000 |
| C            | -0.379116000  | -0.628278000 | -1.120159000 |
| C            | -1.352241000  | 5.820766000  | 2.545178000  |
| C            | 0.213231000   | -2.094956000 | 0.615573000  |
| C            | -1.381313000  | 5.246617000  | 0.216971000  |
| C            | -1.014600000  | 3.905755000  | 0.480565000  |
| C            | -1.551170000  | 6.193998000  | 1.207230000  |
| C            | -0.642773000  | 1.212276000  | -2.792330000 |
| C            | 0.639607000   | -2.283042000 | 2.002164000  |
| C            | -0.305885000  | -1.638243000 | -2.073386000 |
| C            | -0.855186000  | 3.451107000  | -1.974809000 |
| C            | -0.763324000  | 2.575643000  | -3.035633000 |
| C            | 1.500202000   | -2.776146000 | 4.637830000  |
| C            | -0.015354000  | -2.928431000 | -1.642144000 |
| C            | 1.494348000   | -3.362977000 | 2.309772000  |
| C            | 0.262714000   | -3.155904000 | -0.309345000 |
| C            | 1.930036000   | -3.613754000 | 3.598343000  |
| H            | -0.870711000  | 4.199226000  | 3.878965000  |
| H            | -1.477329000  | 6.551024000  | 3.342141000  |
| H            | -1.845179000  | 7.206686000  | 0.947723000  |
| H            | -1.567700000  | 5.558681000  | -0.805068000 |
| H            | 0.351906000   | -1.024166000 | 5.157769000  |
| H            | 1.827610000   | -2.963560000 | 5.658769000  |
| H            | 2.608380000   | -4.439256000 | 3.793461000  |
| H            | 1.876916000   | -3.977957000 | 1.500445000  |
| H            | 0.532497000   | -4.148381000 | 0.028836000  |
| H            | 0.027645000   | -3.746408000 | -2.355937000 |
| H            | -0.470221000  | -1.430046000 | -3.122609000 |
| H            | -0.588671000  | 0.502722000  | -3.607379000 |
| H            | -0.786413000  | 2.950767000  | -4.055225000 |
| H            | -0.935051000  | 4.510628000  | -2.174934000 |

|    |              |              |              |
|----|--------------|--------------|--------------|
| C  | 5.119092000  | -0.023390000 | -1.578658000 |
| C  | 4.574580000  | 0.624542000  | -2.826490000 |
| O  | 4.613287000  | -1.377833000 | -1.545558000 |
| H  | 4.776197000  | 0.518228000  | -0.693249000 |
| H  | 4.950449000  | 1.646671000  | -2.918708000 |
| C  | 6.630143000  | -0.177668000 | -1.547383000 |
| H  | 6.947940000  | -0.695796000 | -0.639767000 |
| H  | 6.987293000  | -0.730270000 | -2.420078000 |
| Cl | 7.464057000  | 1.416967000  | -1.552312000 |
| H  | 3.485475000  | 0.653161000  | -2.761949000 |
| H  | 4.871529000  | 0.060573000  | -3.716907000 |
| C  | 4.265317000  | -1.231500000 | 0.900938000  |
| C  | 4.054544000  | -1.891560000 | -0.422892000 |
| C  | 3.491512000  | -0.282304000 | 1.440550000  |
| C  | 2.344267000  | 0.316124000  | 0.691078000  |
| O  | 1.437432000  | 0.827968000  | 1.439648000  |
| O  | 2.341352000  | 0.235893000  | -0.550716000 |
| O  | 3.511075000  | -2.974106000 | -0.496469000 |
| H  | 5.024882000  | -1.723364000 | 1.508314000  |
| H  | 3.622950000  | 0.006193000  | 2.481441000  |
| C  | -4.162760000 | -0.951760000 | -1.743526000 |
| C  | -4.557307000 | 0.492793000  | -1.929382000 |
| O  | -5.229229000 | -1.636200000 | -1.048879000 |
| H  | -3.225486000 | -1.027312000 | -1.178937000 |
| H  | -3.753080000 | 1.042320000  | -2.427483000 |
| C  | -4.061600000 | -1.760591000 | -3.031727000 |
| H  | -3.646101000 | -2.753117000 | -2.840185000 |
| H  | -5.053317000 | -1.864803000 | -3.476482000 |
| Cl | -3.020754000 | -0.997220000 | -4.291616000 |
| H  | -4.740943000 | 0.942593000  | -0.951779000 |
| H  | -5.462644000 | 0.570059000  | -2.540549000 |
| C  | -3.730617000 | -2.561627000 | 0.715336000  |
| C  | -5.053196000 | -2.412635000 | 0.052184000  |
| C  | -3.017172000 | -1.607174000 | 1.327631000  |
| C  | -3.375069000 | -0.152617000 | 1.270180000  |
| O  | -2.390976000 | 0.679265000  | 1.220902000  |
| O  | -4.568516000 | 0.158895000  | 1.211876000  |
| O  | -6.004232000 | -3.058093000 | 0.440919000  |
| H  | -3.434216000 | -3.603507000 | 0.823086000  |
| H  | -2.126204000 | -1.883779000 | 1.886569000  |

71

A\_INT13 E = -2575.0652834

|    |              |              |              |
|----|--------------|--------------|--------------|
| Al | -1.621341000 | 0.191160000  | -0.481455000 |
| O  | -2.810642000 | -0.798807000 | -1.401098000 |

|   |              |              |              |
|---|--------------|--------------|--------------|
| O | -1.926117000 | 1.736944000  | -1.394262000 |
| N | -1.534252000 | -1.211803000 | 0.975516000  |
| N | -0.640096000 | 1.235481000  | 0.944323000  |
| C | -2.839867000 | -2.106430000 | -1.499178000 |
| C | -0.988248000 | 2.637150000  | -1.603982000 |
| C | -0.939711000 | 3.288167000  | -2.854047000 |
| C | -3.370031000 | -2.674218000 | -2.678976000 |
| C | -1.080825000 | -0.755973000 | 2.165367000  |
| C | -1.955383000 | -2.493941000 | 0.837471000  |
| C | -0.559328000 | 0.621415000  | 2.144522000  |
| C | -3.416033000 | -4.041527000 | -2.867380000 |
| C | -0.053771000 | 2.440181000  | 0.736043000  |
| C | -2.450535000 | -4.376354000 | -0.697664000 |
| C | -2.402593000 | -2.985368000 | -0.461889000 |
| C | -2.937755000 | -4.908968000 | -1.875876000 |
| C | -1.060547000 | -1.553168000 | 3.300830000  |
| C | -0.035986000 | 3.011384000  | -0.608046000 |
| C | 0.041418000  | 1.229464000  | 3.237670000  |
| C | -1.967846000 | -3.330987000 | 1.973940000  |
| C | -1.525865000 | -2.861617000 | 3.193964000  |
| C | 0.035244000  | 4.226305000  | -3.140312000 |
| C | 0.587023000  | 2.500223000  | 3.066931000  |
| C | 0.953840000  | 3.960463000  | -0.937943000 |
| C | 0.547312000  | 3.101269000  | 1.825335000  |
| C | 1.002900000  | 4.559521000  | -2.183333000 |
| H | -3.716327000 | -1.984960000 | -3.442814000 |
| H | -3.810231000 | -4.443103000 | -3.797570000 |
| H | -2.939276000 | -5.983101000 | -2.030450000 |
| H | -2.059602000 | -5.054494000 | 0.055619000  |
| H | -1.683313000 | 3.000256000  | -3.590815000 |
| H | 0.058729000  | 4.692998000  | -4.122161000 |
| H | 1.791212000  | 5.268260000  | -2.416520000 |
| H | 1.733804000  | 4.178821000  | -0.214427000 |
| H | 0.990693000  | 4.077729000  | 1.676846000  |
| H | 1.062641000  | 3.006845000  | 3.901159000  |
| H | 0.106228000  | 0.722865000  | 4.193056000  |
| H | -0.693394000 | -1.168799000 | 4.244685000  |
| H | -1.545309000 | -3.508236000 | 4.066320000  |
| H | -2.354931000 | -4.338512000 | 1.889904000  |
| C | 4.435815000  | -1.208209000 | 0.354223000  |
| C | 4.186965000  | -2.160758000 | 1.495677000  |
| O | 4.264750000  | 0.131590000  | 0.882390000  |
| H | 3.707521000  | -1.378047000 | -0.443712000 |
| H | 4.329526000  | -3.192319000 | 1.165223000  |

|    |              |              |              |
|----|--------------|--------------|--------------|
| C  | 5.846169000  | -1.245706000 | -0.208086000 |
| H  | 5.977618000  | -0.483757000 | -0.979920000 |
| H  | 6.588663000  | -1.088526000 | 0.578205000  |
| Cl | 6.199673000  | -2.829650000 | -0.973212000 |
| H  | 3.160348000  | -2.041254000 | 1.846206000  |
| H  | 4.874380000  | -1.961498000 | 2.323583000  |
| C  | 3.285694000  | 0.869504000  | -1.260188000 |
| C  | 3.578643000  | 1.065484000  | 0.193489000  |
| C  | 2.171632000  | 0.322560000  | -1.759751000 |
| C  | 1.135436000  | -0.252587000 | -0.858799000 |
| O  | -0.061015000 | -0.260404000 | -1.363908000 |
| O  | 1.449753000  | -0.623171000 | 0.279209000  |
| O  | 3.316272000  | 2.119153000  | 0.736262000  |
| H  | 3.993168000  | 1.366987000  | -1.922433000 |
| H  | 1.956049000  | 0.374012000  | -2.824023000 |
| C  | -3.699709000 | 2.183602000  | 0.909852000  |
| C  | -4.099744000 | 2.548541000  | 2.301271000  |
| O  | -3.333151000 | 0.792560000  | 0.724870000  |
| H  | -3.008108000 | 2.853374000  | 0.398894000  |
| H  | -4.617150000 | 3.512074000  | 2.307726000  |
| C  | -4.493269000 | 1.313351000  | 0.047505000  |
| H  | -4.374701000 | 1.376429000  | -1.031115000 |
| H  | -5.426873000 | 0.893604000  | 0.417925000  |
| H  | -3.218859000 | 2.641251000  | 2.944536000  |
| H  | -4.764154000 | 1.794763000  | 2.731162000  |

91

A\_TS6 E = -3607.7488013 Imaginary Frequency= 443.1964

|    |              |              |              |
|----|--------------|--------------|--------------|
| Al | -0.484387000 | 1.429159000  | -0.635334000 |
| O  | -0.844222000 | 2.913694000  | -1.613229000 |
| O  | -0.463947000 | 0.194016000  | -1.972268000 |
| N  | -0.283639000 | 2.551082000  | 1.061301000  |
| N  | -0.186390000 | -0.064920000 | 0.775353000  |
| C  | -0.389650000 | 4.118230000  | -1.431950000 |
| C  | -0.066763000 | -1.049900000 | -2.003838000 |
| C  | 0.162656000  | -1.635431000 | -3.272786000 |
| C  | -0.321925000 | 4.977028000  | -2.558332000 |
| C  | -0.346028000 | 1.836943000  | 2.203798000  |
| C  | -0.116947000 | 3.896727000  | 1.084658000  |
| C  | -0.441494000 | 0.377579000  | 2.027445000  |
| C  | 0.175684000  | 6.260468000  | -2.471481000 |
| C  | -0.195448000 | -1.394606000 | 0.507763000  |
| C  | 0.536276000  | 5.957893000  | -0.120651000 |
| C  | 0.014844000  | 4.646665000  | -0.161516000 |
| C  | 0.629121000  | 6.760529000  | -1.242157000 |

|    |              |              |              |
|----|--------------|--------------|--------------|
| C  | -0.262776000 | 2.435127000  | 3.455526000  |
| C  | 0.104064000  | -1.869831000 | -0.844106000 |
| C  | -0.767012000 | -0.482392000 | 3.067028000  |
| C  | -0.087262000 | 4.549146000  | 2.337237000  |
| C  | -0.151895000 | 3.821941000  | 3.509235000  |
| C  | 0.565580000  | -2.950548000 | -3.408982000 |
| C  | -0.826032000 | -1.845034000 | 2.800083000  |
| C  | 0.519365000  | -3.203886000 | -1.024862000 |
| C  | -0.526516000 | -2.302548000 | 1.532920000  |
| C  | 0.754801000  | -3.749774000 | -2.274903000 |
| H  | -0.658783000 | 4.562126000  | -3.503570000 |
| H  | 0.232596000  | 6.877872000  | -3.365469000 |
| H  | 1.057360000  | 7.755619000  | -1.169061000 |
| H  | 0.914523000  | 6.346341000  | 0.820885000  |
| H  | 0.016175000  | -0.995502000 | -4.138568000 |
| H  | 0.750380000  | -3.357622000 | -4.400298000 |
| H  | 1.098972000  | -4.775360000 | -2.368063000 |
| H  | 0.692071000  | -3.822295000 | -0.147266000 |
| H  | -0.627236000 | -3.354425000 | 1.302086000  |
| H  | -1.131771000 | -2.545611000 | 3.571239000  |
| H  | -1.012970000 | -0.094213000 | 4.048427000  |
| H  | -0.276571000 | 1.836881000  | 4.359027000  |
| H  | -0.115459000 | 4.331321000  | 4.468342000  |
| H  | -0.030283000 | 5.629523000  | 2.377663000  |
| C  | -6.163259000 | -1.538655000 | 0.391944000  |
| C  | -6.781843000 | -0.919260000 | 1.618945000  |
| O  | -5.248232000 | -2.561219000 | 0.850708000  |
| H  | -5.615402000 | -0.781907000 | -0.174738000 |
| H  | -7.508068000 | -0.154379000 | 1.333070000  |
| C  | -7.138786000 | -2.269039000 | -0.515161000 |
| H  | -6.615119000 | -2.730758000 | -1.355455000 |
| H  | -7.684780000 | -3.039700000 | 0.034691000  |
| Cl | -8.359915000 | -1.150871000 | -1.217408000 |
| H  | -5.994736000 | -0.454120000 | 2.214181000  |
| H  | -7.291290000 | -1.678137000 | 2.221705000  |
| C  | -3.665154000 | -2.006154000 | -0.964066000 |
| C  | -4.012555000 | -2.694689000 | 0.313657000  |
| C  | -3.201543000 | -0.758854000 | -1.110143000 |
| C  | -3.056204000 | 0.188291000  | 0.041463000  |
| O  | -2.309944000 | 1.220211000  | -0.161180000 |
| O  | -3.650957000 | -0.065944000 | 1.098889000  |
| O  | -3.252928000 | -3.498122000 | 0.813809000  |
| H  | -3.671310000 | -2.677700000 | -1.823152000 |
| H  | -2.854632000 | -0.421454000 | -2.083292000 |

|    |             |              |              |
|----|-------------|--------------|--------------|
| C  | 2.545908000 | 1.021771000  | -0.483580000 |
| C  | 3.564968000 | 1.724944000  | 0.367935000  |
| O  | 1.404003000 | 1.803252000  | -0.797920000 |
| H  | 2.300689000 | 0.011964000  | -0.117049000 |
| H  | 4.526717000 | 1.201984000  | 0.321661000  |
| C  | 2.607424000 | 1.155931000  | -1.928477000 |
| H  | 2.044577000 | 0.481354000  | -2.559759000 |
| H  | 3.009017000 | 2.065265000  | -2.348537000 |
| H  | 3.234332000 | 1.766397000  | 1.411468000  |
| H  | 3.713352000 | 2.745340000  | 0.002013000  |
| C  | 4.852637000 | -1.667255000 | 1.412931000  |
| C  | 5.855019000 | -0.868524000 | 2.207535000  |
| O  | 5.547506000 | -2.825798000 | 0.910162000  |
| H  | 4.483231000 | -1.067725000 | 0.578464000  |
| H  | 5.382193000 | 0.016802000  | 2.641043000  |
| C  | 3.677595000 | -2.202210000 | 2.211595000  |
| H  | 2.998273000 | -2.769338000 | 1.567409000  |
| H  | 4.009355000 | -2.832279000 | 3.040743000  |
| Cl | 2.700424000 | -0.862715000 | 2.921090000  |
| H  | 6.658097000 | -0.549252000 | 1.540335000  |
| H  | 6.281430000 | -1.471109000 | 3.016224000  |
| C  | 4.046662000 | -2.906847000 | -1.049321000 |
| C  | 5.292745000 | -3.309962000 | -0.339784000 |
| C  | 3.830003000 | -1.786831000 | -1.749302000 |
| C  | 4.847925000 | -0.678588000 | -1.850552000 |
| O  | 4.498617000 | 0.363150000  | -2.502576000 |
| O  | 5.942371000 | -0.868163000 | -1.278280000 |
| O  | 5.992727000 | -4.207662000 | -0.754153000 |
| H  | 3.293587000 | -3.695125000 | -1.056771000 |
| H  | 2.885006000 | -1.681685000 | -2.285668000 |

91

A\_INT14 E = -3607.7904605

|    |              |              |              |
|----|--------------|--------------|--------------|
| Al | -0.295504000 | 1.486498000  | -0.836136000 |
| O  | -0.704156000 | 3.111638000  | -1.559733000 |
| O  | -0.759954000 | 0.401878000  | -2.244146000 |
| N  | 0.200911000  | 2.363500000  | 0.945296000  |
| N  | -0.059854000 | -0.209729000 | 0.380859000  |
| C  | -0.078613000 | 4.224170000  | -1.330605000 |
| C  | -0.514866000 | -0.851710000 | -2.464922000 |
| C  | -0.513406000 | -1.297285000 | -3.814071000 |
| C  | -0.060783000 | 5.206223000  | -2.355811000 |
| C  | 0.219330000  | 1.529989000  | 2.003487000  |
| C  | 0.500528000  | 3.678012000  | 1.083736000  |
| C  | -0.023391000 | 0.107345000  | 1.694693000  |

|    |              |              |              |
|----|--------------|--------------|--------------|
| C  | 0.605292000  | 6.405409000  | -2.211897000 |
| C  | -0.278530000 | -1.492427000 | -0.010438000 |
| C  | 1.247725000  | 5.777788000  | 0.010869000  |
| C  | 0.560987000  | 4.549319000  | -0.087440000 |
| C  | 1.288115000  | 6.697118000  | -1.021727000 |
| C  | 0.503744000  | 1.978117000  | 3.289742000  |
| C  | -0.304926000 | -1.830840000 | -1.436467000 |
| C  | -0.192936000 | -0.846807000 | 2.691411000  |
| C  | 0.743284000  | 4.182800000  | 2.379442000  |
| C  | 0.747723000  | 3.335811000  | 3.470893000  |
| C  | -0.334592000 | -2.623632000 | -4.151256000 |
| C  | -0.436749000 | -2.160963000 | 2.311812000  |
| C  | -0.158349000 | -3.179342000 | -1.826104000 |
| C  | -0.479902000 | -2.485407000 | 0.970379000  |
| C  | -0.160023000 | -3.587116000 | -3.147836000 |
| H  | -0.576697000 | 4.951369000  | -3.276882000 |
| H  | 0.614842000  | 7.118548000  | -3.034088000 |
| H  | 1.848016000  | 7.621195000  | -0.911553000 |
| H  | 1.798830000  | 6.000770000  | 0.921024000  |
| H  | -0.664347000 | -0.534219000 | -4.572441000 |
| H  | -0.331201000 | -2.919026000 | -5.198519000 |
| H  | -0.020914000 | -4.634795000 | -3.395818000 |
| H  | -0.020939000 | -3.938298000 | -1.061298000 |
| H  | -0.746207000 | -3.490319000 | 0.673017000  |
| H  | -0.626731000 | -2.924336000 | 3.061170000  |
| H  | -0.173822000 | -0.564556000 | 3.736995000  |
| H  | 0.546353000  | 1.288305000  | 4.123894000  |
| H  | 0.942076000  | 3.728507000  | 4.465415000  |
| H  | 0.905526000  | 5.244515000  | 2.518979000  |
| C  | -6.028449000 | -1.103929000 | 0.923971000  |
| C  | -6.257321000 | -0.679846000 | 2.352343000  |
| O  | -5.159664000 | -2.258961000 | 0.958645000  |
| H  | -5.547127000 | -0.297472000 | 0.365443000  |
| H  | -6.934072000 | 0.177411000  | 2.390913000  |
| C  | -7.271658000 | -1.580527000 | 0.192406000  |
| H  | -7.023605000 | -1.908787000 | -0.819548000 |
| H  | -7.752268000 | -2.402323000 | 0.729261000  |
| Cl | -8.494522000 | -0.270212000 | 0.025827000  |
| H  | -5.299960000 | -0.394450000 | 2.790822000  |
| H  | -6.694508000 | -1.497772000 | 2.934605000  |
| C  | -3.973287000 | -1.474149000 | -1.062519000 |
| C  | -4.092688000 | -2.365652000 | 0.128099000  |
| C  | -3.418758000 | -0.256678000 | -1.104672000 |
| C  | -2.898067000 | 0.432959000  | 0.121707000  |

|    |              |              |              |
|----|--------------|--------------|--------------|
| O  | -2.087128000 | 1.407316000  | -0.076586000 |
| O  | -3.276163000 | 0.018371000  | 1.231435000  |
| O  | -3.334737000 | -3.299158000 | 0.292305000  |
| H  | -4.252836000 | -1.970608000 | -1.992459000 |
| H  | -3.263588000 | 0.236442000  | -2.060711000 |
| C  | 2.574982000  | 0.868715000  | -1.032118000 |
| C  | 3.583284000  | 1.623322000  | -0.167827000 |
| O  | 1.466907000  | 1.622647000  | -1.301632000 |
| H  | 2.327775000  | -0.081288000 | -0.496696000 |
| H  | 4.516142000  | 1.062314000  | -0.026437000 |
| C  | 3.174524000  | 0.475603000  | -2.385465000 |
| H  | 2.442932000  | -0.087903000 | -2.977132000 |
| H  | 3.438566000  | 1.377834000  | -2.941969000 |
| H  | 3.151893000  | 1.826956000  | 0.818281000  |
| H  | 3.822324000  | 2.584477000  | -0.637432000 |
| C  | 4.446703000  | -1.775682000 | 1.543590000  |
| C  | 5.777642000  | -1.124010000 | 1.824191000  |
| O  | 4.716462000  | -3.165608000 | 1.236509000  |
| H  | 3.947628000  | -1.280497000 | 0.704365000  |
| H  | 5.639167000  | -0.068620000 | 2.069693000  |
| C  | 3.489989000  | -1.823386000 | 2.724148000  |
| H  | 2.522270000  | -2.240797000 | 2.427366000  |
| H  | 3.911578000  | -2.419841000 | 3.536798000  |
| Cl | 3.163445000  | -0.182188000 | 3.376754000  |
| H  | 6.409574000  | -1.201506000 | 0.937583000  |
| H  | 6.277365000  | -1.617009000 | 2.664035000  |
| C  | 3.095818000  | -3.212447000 | -0.639160000 |
| C  | 4.160599000  | -3.828237000 | 0.198044000  |
| C  | 3.201023000  | -2.208024000 | -1.519038000 |
| C  | 4.469539000  | -1.465696000 | -1.705826000 |
| O  | 4.427064000  | -0.253853000 | -2.279360000 |
| O  | 5.544948000  | -1.930834000 | -1.362310000 |
| O  | 4.465256000  | -4.987967000 | 0.020872000  |
| H  | 2.149567000  | -3.747842000 | -0.581077000 |
| H  | 2.326951000  | -1.943651000 | -2.109358000 |

81

A\_INT3 (Full mode) E = -2631.6181171

|    |              |              |              |
|----|--------------|--------------|--------------|
| Al | -0.037545000 | 0.830086000  | 0.076646000  |
| O  | -1.187361000 | -0.227144000 | -0.843979000 |
| O  | 1.285253000  | -0.370963000 | -0.161106000 |
| N  | -1.241244000 | 2.395015000  | -0.403390000 |
| N  | 1.346594000  | 2.323494000  | -0.177364000 |
| C  | -2.506712000 | -0.220365000 | -0.764450000 |
| C  | 2.597150000  | -0.348695000 | -0.236976000 |



|    |              |              |              |
|----|--------------|--------------|--------------|
| C  | 3.311741000  | -1.576492000 | -0.395548000 |
| C  | -3.241572000 | -1.428273000 | -0.955645000 |
| C  | -0.644434000 | 3.604765000  | -0.422592000 |
| C  | -2.582987000 | 2.284671000  | -0.578642000 |
| C  | 0.801624000  | 3.566160000  | -0.167491000 |
| C  | -4.617516000 | -1.401528000 | -0.745117000 |
| C  | 2.690209000  | 2.169421000  | 0.008200000  |
| C  | -4.621615000 | 0.930218000  | -0.309552000 |
| C  | -3.231459000 | 0.984265000  | -0.524349000 |
| C  | -5.336846000 | -0.251102000 | -0.384283000 |
| C  | -1.343541000 | 4.778896000  | -0.662315000 |
| C  | 3.333331000  | 0.871967000  | -0.155180000 |
| C  | 1.537668000  | 4.711209000  | 0.090107000  |
| C  | -3.328999000 | 3.452440000  | -0.856278000 |
| C  | -2.714425000 | 4.686492000  | -0.895476000 |
| C  | 4.698231000  | -1.529782000 | -0.481154000 |
| C  | 2.889788000  | 4.563725000  | 0.389340000  |
| C  | 4.738891000  | 0.832529000  | -0.276711000 |
| C  | 3.456927000  | 3.309713000  | 0.348621000  |
| C  | 5.446041000  | -0.343056000 | -0.436557000 |
| H  | -5.164417000 | -2.330443000 | -0.852821000 |
| H  | -5.143604000 | 1.844257000  | -0.036814000 |
| H  | 5.231637000  | -2.464440000 | -0.604278000 |
| H  | 5.296107000  | 1.763782000  | -0.288236000 |
| H  | 4.500976000  | 3.193750000  | 0.604012000  |
| H  | 3.491224000  | 5.426314000  | 0.660094000  |
| H  | 1.062660000  | 5.684325000  | 0.109194000  |
| H  | -0.835922000 | 5.735363000  | -0.692584000 |
| H  | -3.292909000 | 5.577551000  | -1.120396000 |
| H  | -4.386151000 | 3.367003000  | -1.073828000 |
| C  | -0.196874000 | 0.216919000  | 2.895636000  |
| C  | 1.282837000  | 0.005132000  | 3.170379000  |
| O  | -0.427611000 | 1.016974000  | 1.772060000  |
| H  | -0.646230000 | 0.716884000  | 3.770410000  |
| H  | 1.443571000  | -0.537919000 | 4.106177000  |
| C  | -0.957278000 | -1.078895000 | 2.650466000  |
| H  | -2.019579000 | -0.875989000 | 2.493458000  |
| H  | -0.561817000 | -1.581278000 | 1.762875000  |
| Cl | -0.840905000 | -2.263970000 | 4.007569000  |
| H  | 1.784958000  | 0.975003000  | 3.241974000  |
| H  | 1.754136000  | -0.565133000 | 2.362643000  |
| C  | 6.968914000  | -0.308393000 | -0.575468000 |
| C  | 7.567474000  | -1.707328000 | -0.722106000 |
| H  | 8.656478000  | -1.636686000 | -0.808946000 |

|   |              |              |              |
|---|--------------|--------------|--------------|
| H | 7.346273000  | -2.339731000 | 0.144228000  |
| H | 7.198701000  | -2.218651000 | -1.617610000 |
| C | 7.582866000  | 0.349446000  | 0.668333000  |
| H | 7.224314000  | 1.375670000  | 0.801533000  |
| H | 7.331982000  | -0.209668000 | 1.575586000  |
| H | 8.675014000  | 0.389311000  | 0.584586000  |
| C | 7.351749000  | 0.512587000  | -1.814847000 |
| H | 6.934154000  | 0.070636000  | -2.725403000 |
| H | 6.984033000  | 1.541843000  | -1.747096000 |
| H | 8.441221000  | 0.556563000  | -1.927299000 |
| C | 2.572915000  | -2.914875000 | -0.488274000 |
| C | 1.805417000  | -3.182035000 | 0.814505000  |
| H | 2.495954000  | -3.273430000 | 1.660765000  |
| H | 1.103091000  | -2.380948000 | 1.041057000  |
| H | 1.237839000  | -4.117135000 | 0.741071000  |
| C | 3.531036000  | -4.092947000 | -0.689325000 |
| H | 4.107498000  | -4.007377000 | -1.617242000 |
| H | 4.234116000  | -4.205976000 | 0.143283000  |
| H | 2.948179000  | -5.017491000 | -0.750780000 |
| C | 1.623099000  | -2.899882000 | -1.695506000 |
| H | 0.882975000  | -2.102562000 | -1.627506000 |
| H | 2.189129000  | -2.767570000 | -2.624901000 |
| H | 1.088203000  | -3.854687000 | -1.763998000 |
| C | -2.540947000 | -2.722387000 | -1.380195000 |
| C | -6.836888000 | -0.261761000 | -0.087696000 |
| C | -1.537821000 | -3.168803000 | -0.309569000 |
| H | -1.070544000 | -4.116265000 | -0.604320000 |
| H | -0.744733000 | -2.432860000 | -0.177443000 |
| H | -2.033838000 | -3.328151000 | 0.655340000  |
| C | -3.530007000 | -3.873483000 | -1.584321000 |
| H | -4.050501000 | -4.144797000 | -0.659284000 |
| H | -4.282275000 | -3.644923000 | -2.347456000 |
| H | -2.981060000 | -4.759016000 | -1.920233000 |
| C | -1.821946000 | -2.499769000 | -2.720301000 |
| H | -1.287474000 | -3.410298000 | -3.015948000 |
| H | -2.544875000 | -2.264389000 | -3.509550000 |
| H | -1.098011000 | -1.686028000 | -2.662074000 |
| C | -7.450832000 | -1.650915000 | -0.260768000 |
| H | -7.339064000 | -2.023369000 | -1.284751000 |
| H | -7.001326000 | -2.383909000 | 0.417305000  |
| H | -8.522372000 | -1.612318000 | -0.039803000 |
| C | -7.071646000 | 0.193679000  | 1.359402000  |
| H | -6.575307000 | -0.475662000 | 2.069441000  |
| H | -6.685993000 | 1.203828000  | 1.531836000  |

|   |              |             |              |
|---|--------------|-------------|--------------|
| H | -8.142759000 | 0.202060000 | 1.592303000  |
| C | -7.558227000 | 0.704081000 | -1.038304000 |
| H | -8.635151000 | 0.713032000 | -0.834578000 |
| H | -7.193761000 | 1.730731000 | -0.925967000 |
| H | -7.413008000 | 0.411765000 | -2.083555000 |

111

A\_TS2 (Full mode) E = -3285.001811 Imaginary Frequency= 416.4784

|    |              |              |              |
|----|--------------|--------------|--------------|
| A1 | -0.030580000 | -0.335583000 | 0.820547000  |
| O  | 1.330938000  | 0.897512000  | 0.800864000  |
| O  | -1.443623000 | 0.745806000  | 0.352069000  |
| N  | 1.291054000  | -1.851825000 | 1.130527000  |
| N  | -1.315242000 | -1.961384000 | 0.867127000  |
| C  | 2.582273000  | 0.748738000  | 0.461527000  |
| C  | -2.600534000 | 0.485154000  | -0.192039000 |
| C  | -3.290150000 | 1.524849000  | -0.904628000 |
| C  | 3.342287000  | 1.880093000  | 0.019369000  |
| C  | 0.717517000  | -2.984980000 | 1.584522000  |
| C  | 2.636846000  | -1.709752000 | 1.108659000  |
| C  | -0.754306000 | -3.025289000 | 1.480740000  |
| C  | 4.635658000  | 1.677690000  | -0.449508000 |
| C  | -2.651191000 | -1.905590000 | 0.662059000  |
| C  | 4.556518000  | -0.643535000 | 0.026466000  |
| C  | 3.253230000  | -0.515024000 | 0.541204000  |
| C  | 5.262196000  | 0.422164000  | -0.501630000 |
| C  | 1.469104000  | -4.051432000 | 2.061062000  |
| C  | -3.243184000 | -0.786832000 | -0.068574000 |
| C  | -1.508780000 | -4.093258000 | 1.949375000  |
| C  | 3.436975000  | -2.751364000 | 1.631895000  |
| C  | 2.855219000  | -3.911483000 | 2.098829000  |
| C  | -4.553079000 | 1.260881000  | -1.409250000 |
| C  | -2.892654000 | -4.031381000 | 1.803687000  |
| C  | -4.514664000 | -0.987126000 | -0.650522000 |
| C  | -3.462338000 | -2.947589000 | 1.168108000  |
| C  | -5.197491000 | 0.013780000  | -1.310667000 |
| H  | 5.180835000  | 2.535968000  | -0.825746000 |
| H  | 4.995821000  | -1.637519000 | -0.023833000 |
| H  | -5.072230000 | 2.052329000  | -1.942781000 |
| H  | -4.950100000 | -1.979509000 | -0.602906000 |
| H  | -4.539699000 | -2.875198000 | 1.086597000  |
| H  | -3.521305000 | -4.824819000 | 2.198767000  |
| H  | -1.038746000 | -4.936834000 | 2.440501000  |
| H  | 0.994036000  | -4.964225000 | 2.400035000  |
| H  | 3.474842000  | -4.710591000 | 2.496364000  |
| H  | 4.511029000  | -2.620423000 | 1.682840000  |

|    |              |              |              |
|----|--------------|--------------|--------------|
| C  | -0.983762000 | 0.368225000  | 3.535718000  |
| C  | -2.474819000 | 0.070364000  | 3.415907000  |
| O  | -0.199598000 | -0.339611000 | 2.645648000  |
| H  | -0.676951000 | 0.107807000  | 4.568751000  |
| H  | -3.047592000 | 0.566260000  | 4.206769000  |
| C  | -0.662907000 | 1.844346000  | 3.332361000  |
| H  | 0.408923000  | 2.013376000  | 3.444510000  |
| H  | -0.986463000 | 2.178077000  | 2.343052000  |
| Cl | -1.482031000 | 2.942820000  | 4.538256000  |
| H  | -2.640384000 | -1.009968000 | 3.494958000  |
| H  | -2.866889000 | 0.407745000  | 2.450149000  |
| C  | 0.105145000  | -1.402351000 | -2.246104000 |
| C  | -0.387769000 | -2.804249000 | -2.028107000 |
| O  | 0.262469000  | -0.536614000 | -1.129712000 |
| H  | -0.416959000 | -0.896254000 | -3.068139000 |
| H  | -0.179856000 | -3.381170000 | -2.934301000 |
| C  | 1.530452000  | -1.153156000 | -2.157108000 |
| H  | 1.977691000  | -0.269651000 | -2.588942000 |
| H  | 2.126921000  | -1.786923000 | -1.519742000 |
| Cl | 2.613299000  | -2.507980000 | -3.994764000 |
| H  | -1.461604000 | -2.831699000 | -1.816834000 |
| H  | 0.150059000  | -3.280771000 | -1.201643000 |
| C  | 6.624255000  | 0.189229000  | -1.154518000 |
| C  | 6.444515000  | -0.730714000 | -2.370804000 |
| H  | 6.020289000  | -1.699323000 | -2.089798000 |
| H  | 5.760161000  | -0.294110000 | -3.104585000 |
| H  | 7.408012000  | -0.913302000 | -2.863337000 |
| C  | 7.577967000  | -0.479916000 | -0.154874000 |
| H  | 8.553920000  | -0.668412000 | -0.619277000 |
| H  | 7.735471000  | 0.152308000  | 0.726260000  |
| H  | 7.187752000  | -1.442687000 | 0.191526000  |
| C  | 7.268992000  | 1.493454000  | -1.624445000 |
| H  | 7.425534000  | 2.194908000  | -0.796730000 |
| H  | 8.246466000  | 1.282933000  | -2.072478000 |
| H  | 6.660718000  | 1.996374000  | -2.383627000 |
| C  | 2.706666000  | 3.272895000  | -0.015479000 |
| C  | 1.543820000  | 3.269225000  | -1.013718000 |
| H  | 1.894280000  | 3.028827000  | -2.024981000 |
| H  | 0.793746000  | 2.530754000  | -0.732871000 |
| H  | 1.061678000  | 4.255238000  | -1.046234000 |
| C  | 2.189304000  | 3.674731000  | 1.374111000  |
| H  | 1.435034000  | 2.975652000  | 1.735109000  |
| H  | 3.008333000  | 3.708007000  | 2.102134000  |
| H  | 1.736812000  | 4.673406000  | 1.330076000  |

|   |              |              |              |
|---|--------------|--------------|--------------|
| C | 3.697969000  | 4.352580000  | -0.458399000 |
| H | 4.569627000  | 4.411193000  | 0.204126000  |
| H | 4.057067000  | 4.194061000  | -1.481462000 |
| H | 3.198118000  | 5.327221000  | -0.435285000 |
| C | -2.586771000 | 2.848865000  | -1.217682000 |
| C | -3.539056000 | 3.866150000  | -1.856560000 |
| H | -2.990877000 | 4.793221000  | -2.054579000 |
| H | -3.942235000 | 3.520032000  | -2.814615000 |
| H | -4.381216000 | 4.111822000  | -1.198488000 |
| C | -1.483860000 | 2.535294000  | -2.242355000 |
| H | -0.892080000 | 3.431866000  | -2.463286000 |
| H | -0.806301000 | 1.759572000  | -1.875196000 |
| H | -1.929188000 | 2.181869000  | -3.180089000 |
| C | -1.987574000 | 3.524020000  | 0.028509000  |
| H | -2.722188000 | 3.584984000  | 0.841013000  |
| H | -1.114041000 | 2.992421000  | 0.403031000  |
| H | -1.678635000 | 4.546769000  | -0.220872000 |
| C | -6.569554000 | -0.177465000 | -1.952336000 |
| C | -7.110544000 | -1.592044000 | -1.747838000 |
| H | -6.458365000 | -2.346479000 | -2.201022000 |
| H | -7.221013000 | -1.834258000 | -0.684843000 |
| H | -8.097834000 | -1.685484000 | -2.213573000 |
| C | -7.566565000 | 0.812753000  | -1.333467000 |
| H | -7.245008000 | 1.849523000  | -1.475486000 |
| H | -8.556574000 | 0.704674000  | -1.793784000 |
| H | -7.670242000 | 0.643929000  | -0.256358000 |
| C | -6.477123000 | 0.088244000  | -3.461929000 |
| H | -6.127771000 | 1.104609000  | -3.670706000 |
| H | -5.778174000 | -0.605576000 | -3.940499000 |
| H | -7.458264000 | -0.031688000 | -3.938045000 |

120

A\_INT10 (Full mode) E = -3664.3507356

|    |              |              |              |
|----|--------------|--------------|--------------|
| Al | -0.739230000 | 0.478345000  | 0.612841000  |
| O  | -1.996067000 | -0.089654000 | -0.610877000 |
| O  | 0.603002000  | -0.612733000 | 0.014503000  |
| N  | -1.978103000 | 1.945024000  | 1.259816000  |
| N  | 0.572312000  | 1.525325000  | 1.777446000  |
| C  | -3.286056000 | 0.018503000  | -0.589995000 |
| C  | 1.812031000  | -0.836410000 | 0.442977000  |
| C  | 2.568062000  | -1.898310000 | -0.151895000 |
| C  | -4.060590000 | -0.746046000 | -1.525910000 |
| C  | -1.361690000 | 2.918873000  | 1.957085000  |
| C  | -3.313690000 | 1.971699000  | 1.038085000  |
| C  | 0.081580000  | 2.710358000  | 2.195149000  |

|    |              |              |              |
|----|--------------|--------------|--------------|
| C  | -5.438861000 | -0.793776000 | -1.367927000 |
| C  | 1.873788000  | 1.207590000  | 1.964301000  |
| C  | -5.381049000 | 0.776237000  | 0.416375000  |
| C  | -3.982438000 | 0.898419000  | 0.303800000  |
| C  | -6.129393000 | -0.085938000 | -0.367004000 |
| C  | -2.055399000 | 4.016321000  | 2.456569000  |
| C  | 2.425225000  | -0.061885000 | 1.482010000  |
| C  | 0.875614000  | 3.660372000  | 2.824415000  |
| C  | -4.046883000 | 3.092425000  | 1.491228000  |
| C  | -3.420437000 | 4.100572000  | 2.196366000  |
| C  | 3.803309000  | -2.227200000 | 0.391522000  |
| C  | 2.223722000  | 3.369580000  | 3.006719000  |
| C  | 3.655903000  | -0.494531000 | 2.008100000  |
| C  | 2.719907000  | 2.154588000  | 2.583786000  |
| C  | 4.363715000  | -1.570040000 | 1.497196000  |
| H  | -6.011477000 | -1.416668000 | -2.046453000 |
| H  | -5.890989000 | 1.359836000  | 1.180213000  |
| H  | 4.360579000  | -3.039403000 | -0.060773000 |
| H  | 4.073776000  | 0.041572000  | 2.857009000  |
| H  | 3.779564000  | 1.949376000  | 2.674654000  |
| H  | 2.887314000  | 4.102539000  | 3.457300000  |
| H  | 0.466405000  | 4.614157000  | 3.135496000  |
| H  | -1.550118000 | 4.784747000  | 3.029191000  |
| H  | -3.990711000 | 4.959607000  | 2.540176000  |
| H  | -5.100402000 | 3.174749000  | 1.253589000  |
| C  | -1.438598000 | -1.751610000 | 2.497215000  |
| C  | -0.094379000 | -2.416968000 | 2.773447000  |
| O  | -1.329879000 | -0.445656000 | 2.066704000  |
| H  | -2.019797000 | -1.773130000 | 3.441884000  |
| H  | -0.219120000 | -3.396263000 | 3.248008000  |
| C  | -2.257416000 | -2.495536000 | 1.449168000  |
| H  | -3.233191000 | -2.023223000 | 1.309790000  |
| H  | -1.731141000 | -2.510365000 | 0.492444000  |
| Cl | -2.594849000 | -4.239389000 | 1.871456000  |
| H  | 0.498155000  | -1.777546000 | 3.435518000  |
| H  | 0.474931000  | -2.558316000 | 1.848990000  |
| C  | 4.310341000  | 1.589679000  | -1.845691000 |
| C  | 4.870030000  | 1.682412000  | -0.450466000 |
| O  | 4.226303000  | 2.939755000  | -2.362863000 |
| H  | 3.316853000  | 1.130480000  | -1.819816000 |
| H  | 4.939937000  | 0.686734000  | -0.004923000 |
| C  | 5.203649000  | 0.872585000  | -2.845421000 |
| H  | 4.715995000  | 0.800507000  | -3.821081000 |
| H  | 6.152838000  | 1.402820000  | -2.956184000 |

|    |               |               |               |
|----|---------------|---------------|---------------|
| C1 | 5. 598237000  | -0. 808231000 | -2. 337896000 |
| H  | 4. 192503000  | 2. 289440000  | 0. 154715000  |
| H  | 5. 865260000  | 2. 141705000  | -0. 456980000 |
| C  | 2. 056114000  | 2. 472714000  | -3. 452692000 |
| C  | 3. 113792000  | 3. 409814000  | -2. 975348000 |
| C  | 1. 024046000  | 1. 992795000  | -2. 750350000 |
| C  | 0. 868826000  | 2. 200953000  | -1. 273919000 |
| O  | -0. 244461000 | 1. 777226000  | -0. 798090000 |
| O  | 1. 799413000  | 2. 747387000  | -0. 655230000 |
| O  | 3. 075676000  | 4. 584745000  | -3. 274511000 |
| H  | 2. 099377000  | 2. 303692000  | -4. 528624000 |
| H  | 0. 250590000  | 1. 415286000  | -3. 253290000 |
| C  | -7. 635367000 | -0. 218049000 | -0. 136321000 |
| C  | -7. 892054000 | -0. 723443000 | 1. 290518000  |
| H  | -7. 477915000 | -0. 038568000 | 2. 037657000  |
| H  | -8. 968399000 | -0. 819557000 | 1. 482886000  |
| H  | -7. 427323000 | -1. 702057000 | 1. 449234000  |
| C  | -8. 313156000 | 1. 149158000  | -0. 307580000 |
| H  | -9. 394224000 | 1. 073339000  | -0. 134099000 |
| H  | -7. 914983000 | 1. 886194000  | 0. 397946000  |
| H  | -8. 156208000 | 1. 540854000  | -1. 318360000 |
| C  | -8. 287241000 | -1. 196757000 | -1. 113445000 |
| H  | -8. 169410000 | -0. 873850000 | -2. 153684000 |
| H  | -7. 863604000 | -2. 202644000 | -1. 023402000 |
| H  | -9. 361309000 | -1. 268077000 | -0. 907898000 |
| C  | -3. 360329000 | -1. 461919000 | -2. 687109000 |
| C  | -2. 397975000 | -2. 551420000 | -2. 195084000 |
| H  | -1. 565868000 | -2. 115065000 | -1. 642696000 |
| H  | -2. 905277000 | -3. 276719000 | -1. 547503000 |
| H  | -1. 984414000 | -3. 097504000 | -3. 053199000 |
| C  | -2. 564029000 | -0. 433595000 | -3. 509877000 |
| H  | -1. 823570000 | 0. 077586000  | -2. 890581000 |
| H  | -2. 038455000 | -0. 938176000 | -4. 331007000 |
| H  | -3. 231418000 | 0. 318372000  | -3. 946905000 |
| C  | -4. 366024000 | -2. 128203000 | -3. 630128000 |
| H  | -4. 929253000 | -2. 928401000 | -3. 136043000 |
| H  | -5. 084170000 | -1. 410247000 | -4. 043241000 |
| H  | -3. 826752000 | -2. 578522000 | -4. 470707000 |
| C  | 5. 717865000  | -1. 950870000 | 2. 096736000  |
| C  | 5. 560167000  | -2. 249483000 | 3. 593664000  |
| H  | 6. 526609000  | -2. 514350000 | 4. 041081000  |
| H  | 5. 167776000  | -1. 384559000 | 4. 138332000  |
| H  | 4. 867962000  | -3. 082309000 | 3. 756525000  |
| C  | 6. 701083000  | -0. 783640000 | 1. 918672000  |

|   |             |              |              |
|---|-------------|--------------|--------------|
| H | 7.675729000 | -1.021733000 | 2.363920000  |
| H | 6.855642000 | -0.562529000 | 0.856430000  |
| H | 6.329340000 | 0.131273000  | 2.394639000  |
| C | 6.321278000 | -3.183555000 | 1.422733000  |
| H | 7.279874000 | -3.432490000 | 1.891941000  |
| H | 5.667076000 | -4.057439000 | 1.514436000  |
| H | 6.509242000 | -3.012484000 | 0.356977000  |
| C | 1.992038000 | -2.689889000 | -1.332666000 |
| C | 1.561257000 | -1.751814000 | -2.474517000 |
| H | 0.768805000 | -1.066642000 | -2.167638000 |
| H | 2.415746000 | -1.159369000 | -2.828383000 |
| H | 1.192651000 | -2.345348000 | -3.321295000 |
| C | 3.015746000 | -3.665656000 | -1.922680000 |
| H | 3.315927000 | -4.438227000 | -1.205654000 |
| H | 2.566649000 | -4.177798000 | -2.780895000 |
| H | 3.916994000 | -3.151083000 | -2.274958000 |
| C | 0.794627000 | -3.521833000 | -0.851436000 |
| H | 1.104779000 | -4.245910000 | -0.088714000 |
| H | 0.023569000 | -2.884794000 | -0.417673000 |
| H | 0.348093000 | -4.077079000 | -1.685952000 |

130

A\_TS4 (Full mode) E = -3857.42422333 Imaginary Frequency= 406.4425

|    |              |              |              |
|----|--------------|--------------|--------------|
| Al | -0.290450000 | -0.993481000 | 0.948314000  |
| O  | -1.790800000 | -1.763973000 | 0.201120000  |
| O  | 1.020937000  | -2.193296000 | 0.455948000  |
| N  | -1.414547000 | 0.596026000  | 1.651938000  |
| N  | 1.170688000  | 0.267354000  | 1.695310000  |
| C  | -2.911343000 | -1.209259000 | -0.173580000 |
| C  | 2.248687000  | -1.964209000 | 0.062471000  |
| C  | 2.908962000  | -2.884888000 | -0.811861000 |
| C  | -3.682538000 | -1.800474000 | -1.232263000 |
| C  | -0.770983000 | 1.294987000  | 2.608733000  |
| C  | -2.760504000 | 0.644625000  | 1.553481000  |
| C  | 0.697865000  | 1.169866000  | 2.580855000  |
| C  | -4.882280000 | -1.207960000 | -1.595102000 |
| C  | 2.499523000  | 0.085344000  | 1.539154000  |
| C  | -4.659012000 | 0.516804000  | 0.017458000  |
| C  | -3.438981000 | -0.038832000 | 0.456971000  |
| C  | -5.400794000 | -0.040482000 | -1.004857000 |
| C  | -1.444559000 | 2.069681000  | 3.544337000  |
| C  | 2.998177000  | -0.834306000 | 0.520478000  |
| C  | 1.542337000  | 1.934449000  | 3.376813000  |
| C  | -3.492784000 | 1.378319000  | 2.513544000  |
| C  | -2.836374000 | 2.082076000  | 3.501914000  |



|    |              |              |              |
|----|--------------|--------------|--------------|
| C  | 4.145598000  | -2.529893000 | -1.344135000 |
| C  | 2.915966000  | 1.722332000  | 3.272972000  |
| C  | 4.252476000  | -0.548633000 | -0.047740000 |
| C  | 3.396023000  | 0.802701000  | 2.361840000  |
| C  | 4.825919000  | -1.344309000 | -1.024028000 |
| H  | -5.450814000 | -1.652294000 | -2.407715000 |
| H  | -4.987315000 | 1.446491000  | 0.473446000  |
| H  | 4.602952000  | -3.202499000 | -2.061039000 |
| H  | 4.751661000  | 0.375057000  | 0.240872000  |
| H  | 4.459569000  | 0.608690000  | 2.284855000  |
| H  | 3.605086000  | 2.279128000  | 3.902320000  |
| H  | 1.143995000  | 2.672656000  | 4.063653000  |
| H  | -0.904904000 | 2.617791000  | 4.308175000  |
| H  | -3.401901000 | 2.638831000  | 4.244054000  |
| H  | -4.575784000 | 1.358308000  | 2.483110000  |
| C  | -0.228825000 | -2.779830000 | 3.281205000  |
| C  | 1.267862000  | -2.916967000 | 3.543995000  |
| O  | -0.568746000 | -1.595066000 | 2.652002000  |
| H  | -0.738621000 | -2.817872000 | 4.264654000  |
| H  | 1.494412000  | -3.812637000 | 4.132317000  |
| C  | -0.808219000 | -3.915438000 | 2.442724000  |
| H  | -1.882838000 | -3.776918000 | 2.312614000  |
| H  | -0.333069000 | -3.962805000 | 1.458789000  |
| Cl | -0.588779000 | -5.558737000 | 3.202333000  |
| H  | 1.614873000  | -2.038966000 | 4.100621000  |
| H  | 1.831017000  | -2.967509000 | 2.607184000  |
| C  | -0.064145000 | 1.279668000  | -1.109476000 |
| C  | -1.199007000 | 1.799218000  | -1.946641000 |
| O  | -0.137427000 | -0.100630000 | -0.807974000 |
| H  | 0.143632000  | 1.912188000  | -0.229475000 |
| H  | -0.966593000 | 2.801850000  | -2.322140000 |
| C  | 1.109390000  | 0.731375000  | -1.769123000 |
| H  | 2.014588000  | 0.534665000  | -1.219005000 |
| H  | 0.984873000  | 0.272608000  | -2.740706000 |
| H  | -2.121514000 | 1.846625000  | -1.360125000 |
| H  | -1.365439000 | 1.135678000  | -2.801324000 |
| C  | 0.202794000  | 5.145904000  | -0.377641000 |
| C  | -0.486794000 | 5.817765000  | -1.537965000 |
| O  | 1.332750000  | 5.967913000  | -0.016319000 |
| H  | 0.535034000  | 4.145821000  | -0.665975000 |
| H  | -1.384234000 | 5.262019000  | -1.822353000 |
| C  | -0.622716000 | 5.047636000  | 0.894435000  |
| H  | -0.054140000 | 4.549986000  | 1.686542000  |
| H  | -0.934905000 | 6.036608000  | 1.239193000  |

|    |              |              |              |
|----|--------------|--------------|--------------|
| C1 | -2.115396000 | 4.073894000  | 0.642124000  |
| H  | 0.201721000  | 5.841589000  | -2.384707000 |
| H  | -0.777316000 | 6.839775000  | -1.273527000 |
| C  | 2.810019000  | 3.995887000  | 0.308866000  |
| C  | 2.576411000  | 5.461646000  | 0.183350000  |
| C  | 2.794922000  | 3.069443000  | -0.657927000 |
| C  | 2.365212000  | 3.346519000  | -2.080465000 |
| O  | 2.059387000  | 2.331800000  | -2.793802000 |
| O  | 2.324864000  | 4.544096000  | -2.425422000 |
| O  | 3.474572000  | 6.241495000  | 0.421250000  |
| H  | 3.165936000  | 3.723904000  | 1.302668000  |
| H  | 3.110150000  | 2.056733000  | -0.400181000 |
| C  | 6.104124000  | -0.887635000 | -1.724686000 |
| C  | 7.214083000  | -0.642415000 | -0.693546000 |
| H  | 8.129451000  | -0.295011000 | -1.187689000 |
| H  | 6.926317000  | 0.121328000  | 0.036305000  |
| H  | 7.450997000  | -1.558920000 | -0.141952000 |
| C  | 5.813568000  | 0.423272000  | -2.471774000 |
| H  | 5.011150000  | 0.293205000  | -3.205168000 |
| H  | 5.494094000  | 1.216960000  | -1.787987000 |
| H  | 6.707594000  | 0.777440000  | -2.999382000 |
| C  | 6.608412000  | -1.919543000 | -2.733355000 |
| H  | 7.525828000  | -1.556118000 | -3.208974000 |
| H  | 6.838626000  | -2.878920000 | -2.256078000 |
| H  | 5.876416000  | -2.103629000 | -3.526852000 |
| C  | 2.265358000  | -4.233442000 | -1.148097000 |
| C  | 2.102832000  | -5.045218000 | 0.146449000  |
| H  | 3.080497000  | -5.290351000 | 0.577416000  |
| H  | 1.533049000  | -4.497009000 | 0.897589000  |
| H  | 1.575400000  | -5.985954000 | -0.053341000 |
| C  | 3.130588000  | -5.064223000 | -2.100221000 |
| H  | 3.259544000  | -4.577866000 | -3.074050000 |
| H  | 4.124301000  | -5.270560000 | -1.686578000 |
| H  | 2.641473000  | -6.028245000 | -2.276741000 |
| C  | 0.901517000  | -4.043618000 | -1.821652000 |
| H  | 0.181491000  | -3.568366000 | -1.156143000 |
| H  | 0.992687000  | -3.416548000 | -2.716516000 |
| H  | 0.494882000  | -5.015115000 | -2.131530000 |
| C  | -3.131391000 | -2.992055000 | -2.019214000 |
| C  | -2.774345000 | -4.173145000 | -1.102754000 |
| H  | -1.997431000 | -3.916813000 | -0.384057000 |
| H  | -3.656497000 | -4.510016000 | -0.545141000 |
| H  | -2.419839000 | -5.016179000 | -1.708571000 |
| C  | -4.137454000 | -3.522983000 | -3.045960000 |

|   |              |              |              |
|---|--------------|--------------|--------------|
| H | -5.067955000 | -3.862357000 | -2.575278000 |
| H | -4.391015000 | -2.777273000 | -3.807756000 |
| H | -3.697419000 | -4.380661000 | -3.566115000 |
| C | -1.894953000 | -2.511434000 | -2.795622000 |
| H | -1.151083000 | -2.060818000 | -2.135358000 |
| H | -1.428058000 | -3.349215000 | -3.328194000 |
| H | -2.186908000 | -1.758547000 | -3.537926000 |
| C | -6.696350000 | 0.564678000  | -1.538862000 |
| C | -7.101829000 | 1.824023000  | -0.774083000 |
| H | -7.261646000 | 1.618112000  | 0.290297000  |
| H | -6.344549000 | 2.611202000  | -0.855865000 |
| H | -8.038440000 | 2.22452000   | -1.179528000 |
| C | -7.833687000 | -0.459520000 | -1.418356000 |
| H | -8.769294000 | -0.048517000 | -1.817549000 |
| H | -7.610528000 | -1.376920000 | -1.972647000 |
| H | -8.002088000 | -0.737917000 | -0.372496000 |
| C | -6.515759000 | 0.936964000  | -3.017841000 |
| H | -5.710323000 | 1.668691000  | -3.141526000 |
| H | -6.261594000 | 0.061355000  | -3.624134000 |
| H | -7.437700000 | 1.369966000  | -3.425614000 |

36

B E = -1580.863315

|    |              |              |              |
|----|--------------|--------------|--------------|
| C  | -0.541818000 | 2.753583000  | -0.917980000 |
| C  | 0.713068000  | 2.883872000  | -0.066276000 |
| N  | 1.333748000  | 1.572143000  | -0.068463000 |
| C  | 2.615453000  | 1.445119000  | -0.219961000 |
| C  | 3.297349000  | 0.194673000  | -0.255228000 |
| C  | 2.577773000  | -1.038997000 | -0.190294000 |
| C  | 3.320015000  | -2.236380000 | -0.278501000 |
| C  | 4.696263000  | -2.211893000 | -0.406276000 |
| C  | 5.405316000  | -0.999106000 | -0.464949000 |
| C  | 4.702013000  | 0.184988000  | -0.394644000 |
| N  | -1.174216000 | 1.484999000  | -0.567688000 |
| C  | -2.466327000 | 1.374162000  | -0.704296000 |
| C  | -3.220652000 | 0.195835000  | -0.462655000 |
| C  | -2.578656000 | -1.037388000 | -0.119886000 |
| C  | -3.394754000 | -2.181740000 | 0.031944000  |
| C  | -4.764633000 | -2.100386000 | -0.121071000 |
| C  | -5.398220000 | -0.885837000 | -0.447429000 |
| C  | -4.625152000 | 0.240735000  | -0.620258000 |
| O  | -1.290197000 | -1.140363000 | 0.024534000  |
| Al | -0.001910000 | 0.109916000  | 0.313688000  |
| O  | 1.277113000  | -1.101875000 | -0.077740000 |
| H  | -3.030043000 | 2.253343000  | -1.045152000 |

|    |              |              |              |
|----|--------------|--------------|--------------|
| H  | 3.226898000  | 2.350578000  | -0.339012000 |
| H  | -5.085180000 | 1.192122000  | -0.882935000 |
| H  | -6.475846000 | -0.842120000 | -0.564061000 |
| H  | -5.366416000 | -2.995674000 | 0.014415000  |
| H  | 5.239520000  | -3.151884000 | -0.462275000 |
| H  | 6.485466000  | -0.997001000 | -0.565575000 |
| H  | -2.906378000 | -3.117097000 | 0.284511000  |
| H  | 2.771477000  | -3.171519000 | -0.233779000 |
| H  | 5.222404000  | 1.140294000  | -0.442908000 |
| Cl | -0.201567000 | 0.578987000  | 2.417130000  |
| H  | -1.225275000 | 3.598431000  | -0.771260000 |
| H  | -0.261872000 | 2.728333000  | -1.980212000 |
| H  | 1.386516000  | 3.663233000  | -0.443515000 |
| H  | 0.435923000  | 3.127743000  | 0.967871000  |

46

B\_INT1' E = -1773.9807903

|    |              |              |              |
|----|--------------|--------------|--------------|
| C  | -0.703556000 | 2.912746000  | 0.640913000  |
| C  | 0.559411000  | 2.518686000  | 1.399543000  |
| N  | 1.194335000  | 1.447914000  | 0.650420000  |
| C  | 2.486287000  | 1.366947000  | 0.586167000  |
| C  | 3.199762000  | 0.318698000  | -0.070360000 |
| C  | 2.528481000  | -0.828226000 | -0.606673000 |
| C  | 3.328194000  | -1.853728000 | -1.157340000 |
| C  | 4.705481000  | -1.740882000 | -1.202858000 |
| C  | 5.363701000  | -0.611301000 | -0.687209000 |
| C  | 4.608300000  | 0.395434000  | -0.122850000 |
| N  | -1.347218000 | 1.677414000  | 0.231035000  |
| C  | -2.633087000 | 1.546605000  | 0.297043000  |
| C  | -3.352848000 | 0.381911000  | -0.107993000 |
| C  | -2.692247000 | -0.759970000 | -0.666348000 |
| C  | -3.497618000 | -1.862789000 | -1.033761000 |
| C  | -4.869302000 | -1.837125000 | -0.865439000 |
| C  | -5.517595000 | -0.714778000 | -0.321676000 |
| C  | -4.755665000 | 0.374691000  | 0.046819000  |
| O  | -1.403292000 | -0.833542000 | -0.841863000 |
| Al | -0.049690000 | 0.319530000  | -0.465695000 |
| O  | 1.231044000  | -0.981878000 | -0.561213000 |
| H  | -3.229853000 | 2.382759000  | 0.688407000  |
| H  | 3.091931000  | 2.140900000  | 1.079331000  |
| H  | -5.229960000 | 1.259941000  | 0.468385000  |
| H  | -6.595400000 | -0.705410000 | -0.198272000 |
| H  | -5.456326000 | -2.702482000 | -1.163671000 |
| H  | 5.288452000  | -2.542961000 | -1.648945000 |
| H  | 6.445126000  | -0.535760000 | -0.729701000 |

|    |              |              |              |
|----|--------------|--------------|--------------|
| H  | -2.996410000 | -2.725906000 | -1.461034000 |
| H  | 2.819060000  | -2.723413000 | -1.560541000 |
| H  | 5.091218000  | 1.277735000  | 0.294725000  |
| H  | -1.367017000 | 3.540741000  | 1.248595000  |
| H  | -0.425824000 | 3.465965000  | -0.266003000 |
| H  | 1.233132000  | 3.372349000  | 1.546650000  |
| H  | 0.280759000  | 2.130465000  | 2.390475000  |
| Cl | 0.319140000  | 1.415967000  | -2.339887000 |
| C  | 0.111099000  | -1.258572000 | 2.792935000  |
| C  | 1.601804000  | -1.167562000 | 2.851527000  |
| O  | -0.563069000 | -0.587115000 | 1.709217000  |
| H  | -0.411597000 | -1.104254000 | 3.739171000  |
| H  | 1.990845000  | -1.903230000 | 3.561791000  |
| C  | -0.592862000 | -2.020170000 | 1.765113000  |
| H  | -1.580220000 | -2.435590000 | 1.960723000  |
| H  | -0.016926000 | -2.496190000 | 0.972251000  |
| H  | 1.927474000  | -0.178757000 | 3.190475000  |
| H  | 2.048412000  | -1.362940000 | 1.874667000  |

37

B\_INT1 E = -2041.1619996

|    |              |              |              |
|----|--------------|--------------|--------------|
| C  | -0.639510000 | 2.828821000  | -0.415397000 |
| C  | 0.639679000  | 2.828966000  | 0.415277000  |
| N  | 1.294036000  | 1.553031000  | 0.207658000  |
| C  | 2.579011000  | 1.461561000  | 0.189920000  |
| C  | 3.308208000  | 0.232869000  | 0.086883000  |
| C  | 2.655316000  | -1.048774000 | 0.087701000  |
| C  | 3.496339000  | -2.193211000 | 0.036996000  |
| C  | 4.871097000  | -2.084136000 | -0.024235000 |
| C  | 5.504082000  | -0.828381000 | -0.029944000 |
| C  | 4.714044000  | 0.303680000  | 0.030844000  |
| N  | -1.293970000 | 1.553018000  | -0.207267000 |
| C  | -2.578957000 | 1.461512000  | -0.191058000 |
| C  | -3.308247000 | 0.232869000  | -0.088016000 |
| C  | -2.655271000 | -1.048742000 | -0.086549000 |
| C  | -3.496292000 | -2.193166000 | -0.035126000 |
| C  | -4.871177000 | -2.084116000 | 0.023302000  |
| C  | -5.504272000 | -0.828401000 | 0.025744000  |
| C  | -4.714188000 | 0.303643000  | -0.034792000 |
| O  | -1.376332000 | -1.213311000 | -0.146671000 |
| Al | 0.000037000  | 0.001189000  | 0.001372000  |
| O  | 1.376408000  | -1.213354000 | 0.148746000  |
| H  | -3.181085000 | 2.380285000  | -0.275995000 |
| H  | 3.181186000  | 2.380431000  | 0.273370000  |
| H  | -5.173782000 | 1.292613000  | -0.043266000 |

|    |              |              |              |
|----|--------------|--------------|--------------|
| H  | -6.586675000 | -0.751138000 | 0.069820000  |
| H  | -5.474324000 | -2.989513000 | 0.067725000  |
| H  | 5.474229000  | -2.989552000 | -0.068485000 |
| H  | 6.586372000  | -0.751085000 | -0.076761000 |
| H  | -3.005766000 | -3.161890000 | -0.037222000 |
| H  | 3.005909000  | -3.161964000 | 0.041419000  |
| H  | 5.173565000  | 1.292695000  | 0.037030000  |
| Cl | -0.312190000 | 0.203910000  | 2.327262000  |
| H  | -1.294233000 | 3.672834000  | -0.154548000 |
| H  | -0.378751000 | 2.893813000  | -1.480781000 |
| H  | 1.294462000  | 3.672817000  | 0.154049000  |
| H  | 0.378937000  | 2.894436000  | 1.480649000  |
| Cl | 0.312145000  | 0.202606000  | -2.325701000 |

47

B\_TS1 E = -2234.2480531 Imaginary Frequency= 418.5894

|    |              |              |              |
|----|--------------|--------------|--------------|
| C  | 0.720411000  | -2.375840000 | 2.166877000  |
| C  | -0.552771000 | -1.636025000 | 2.572339000  |
| N  | -1.198556000 | -1.191297000 | 1.355188000  |
| C  | -2.479202000 | -1.270858000 | 1.208290000  |
| C  | -3.192079000 | -0.820567000 | 0.052605000  |
| C  | -2.544996000 | -0.115294000 | -1.018930000 |
| C  | -3.366910000 | 0.346405000  | -2.076095000 |
| C  | -4.727136000 | 0.108522000  | -2.089817000 |
| C  | -5.356752000 | -0.592472000 | -1.046169000 |
| C  | -4.584966000 | -1.036644000 | 0.008468000  |
| N  | 1.376743000  | -1.580561000 | 1.149064000  |
| C  | 2.663953000  | -1.505749000 | 1.090292000  |
| C  | 3.395699000  | -0.801817000 | 0.082378000  |
| C  | 2.749869000  | -0.164076000 | -1.032869000 |
| C  | 3.589598000  | 0.485718000  | -1.975079000 |
| C  | 4.961988000  | 0.507923000  | -1.828805000 |
| C  | 5.590705000  | -0.121371000 | -0.739270000 |
| C  | 4.801335000  | -0.765328000 | 0.192378000  |
| O  | 1.470744000  | -0.160472000 | -1.226340000 |
| Al | 0.092347000  | -0.665668000 | -0.120051000 |
| O  | -1.274595000 | 0.154327000  | -1.039548000 |
| H  | 3.262833000  | -2.020500000 | 1.857988000  |
| H  | -3.084665000 | -1.703050000 | 2.020374000  |
| H  | 5.258214000  | -1.264071000 | 1.047454000  |
| H  | 6.671011000  | -0.099553000 | -0.633687000 |
| H  | 5.566257000  | 1.024424000  | -2.571913000 |
| H  | -5.321065000 | 0.474699000  | -2.924692000 |
| H  | -6.427366000 | -0.771668000 | -1.065854000 |
| H  | 3.102702000  | 0.972007000  | -2.814818000 |

|    |              |              |              |
|----|--------------|--------------|--------------|
| H  | -2.879993000 | 0.892221000  | -2.878037000 |
| H  | -5.045365000 | -1.570779000 | 0.839639000  |
| H  | 1.375319000  | -2.563375000 | 3.029526000  |
| H  | 0.445081000  | -3.337707000 | 1.712886000  |
| H  | -1.213636000 | -2.267248000 | 3.183313000  |
| H  | -0.282604000 | -0.747882000 | 3.162900000  |
| Cl | -0.262401000 | -2.732142000 | -1.091065000 |
| C  | -0.134692000 | 2.047771000  | 1.553911000  |
| C  | -1.625097000 | 2.032701000  | 1.716855000  |
| O  | 0.532870000  | 0.922068000  | 0.970035000  |
| H  | 0.385079000  | 2.368498000  | 2.464011000  |
| H  | -1.943211000 | 3.060350000  | 1.917907000  |
| C  | 0.449343000  | 2.519480000  | 0.321290000  |
| H  | 1.471870000  | 2.861567000  | 0.287531000  |
| H  | -0.117150000 | 2.430862000  | -0.595900000 |
| Cl | -0.184240000 | 5.017220000  | 0.388670000  |
| H  | -1.939410000 | 1.388696000  | 2.545596000  |
| H  | -2.120788000 | 1.700638000  | 0.802323000  |

47

B\_INT2 E = -2234.2810668

|    |              |              |              |
|----|--------------|--------------|--------------|
| C  | -0.578223000 | -2.075879000 | 2.337499000  |
| C  | 0.688472000  | -2.737967000 | 1.797089000  |
| N  | 1.356302000  | -1.773909000 | 0.949110000  |
| C  | 2.640763000  | -1.708729000 | 0.890277000  |
| C  | 3.378350000  | -0.841535000 | 0.018236000  |
| C  | 2.741379000  | -0.013778000 | -0.973878000 |
| C  | 3.599537000  | 0.771620000  | -1.792724000 |
| C  | 4.972031000  | 0.749233000  | -1.646305000 |
| C  | 5.587967000  | -0.063417000 | -0.677843000 |
| C  | 4.782914000  | -0.844338000 | 0.129676000  |
| N  | -1.234345000 | -1.425072000 | 1.224797000  |
| C  | -2.513049000 | -1.456500000 | 1.083380000  |
| C  | -3.225738000 | -0.797632000 | 0.025931000  |
| C  | -2.574563000 | 0.072637000  | -0.915462000 |
| C  | -3.401311000 | 0.704468000  | -1.880027000 |
| C  | -4.764457000 | 0.484604000  | -1.927386000 |
| C  | -5.395615000 | -0.371093000 | -1.008962000 |
| C  | -4.618807000 | -0.989523000 | -0.047255000 |
| O  | -1.306467000 | 0.340112000  | -0.900188000 |
| Al | 0.091280000  | -0.557587000 | -0.067123000 |
| O  | 1.467195000  | 0.043059000  | -1.167142000 |
| H  | -3.124387000 | -2.013721000 | 1.812206000  |
| H  | 3.240564000  | -2.368297000 | 1.538856000  |
| H  | -5.079739000 | -1.652395000 | 0.685730000  |

|    |              |              |              |
|----|--------------|--------------|--------------|
| H  | -5.357247000 | 0.985097000  | -2.691028000 |
| H  | 5.586005000  | 1.372207000  | -2.294640000 |
| H  | 5.230305000  | -1.489902000 | 0.886509000  |
| H  | -1.234756000 | -2.803323000 | 2.837986000  |
| H  | -0.294545000 | -1.296797000 | 3.058690000  |
| H  | 1.339674000  | -3.093752000 | 2.609117000  |
| H  | 0.403482000  | -3.591582000 | 1.166628000  |
| C  | 0.021488000  | 1.938604000  | 1.533634000  |
| C  | -1.440632000 | 1.970716000  | 1.972624000  |
| O  | 0.484914000  | 0.670038000  | 1.255399000  |
| H  | 0.623356000  | 2.372727000  | 2.359177000  |
| H  | -1.753447000 | 2.979801000  | 2.263817000  |
| C  | 0.277367000  | 2.804593000  | 0.302767000  |
| H  | 1.323016000  | 2.731597000  | -0.000022000 |
| H  | -0.367724000 | 2.513814000  | -0.529686000 |
| Cl | -0.035725000 | 4.584435000  | 0.608305000  |
| H  | -1.579683000 | 1.303322000  | 2.830364000  |
| H  | -2.098129000 | 1.626041000  | 1.167568000  |
| H  | -6.467805000 | -0.538647000 | -1.051034000 |
| H  | 6.668484000  | -0.078841000 | -0.569676000 |
| H  | 3.122357000  | 1.396432000  | -2.542547000 |
| Cl | -0.290205000 | -2.471461000 | -1.439206000 |
| H  | -2.911698000 | 1.364985000  | -2.589605000 |

46

B\_INT3 E = -1773.9832678

|   |              |              |              |
|---|--------------|--------------|--------------|
| C | 0.448372000  | -2.516069000 | -2.039565000 |
| C | -0.899565000 | -2.990288000 | -1.513659000 |
| N | -1.467566000 | -1.900438000 | -0.728435000 |
| C | -2.762487000 | -1.824814000 | -0.604095000 |
| C | -3.455447000 | -0.873280000 | 0.191502000  |
| C | -2.748420000 | 0.041950000  | 1.037118000  |
| C | -3.515687000 | 0.907149000  | 1.851747000  |
| C | -4.895755000 | 0.882109000  | 1.812147000  |
| C | -5.590914000 | -0.012304000 | 0.975843000  |
| C | -4.869197000 | -0.879472000 | 0.185411000  |
| N | 1.082318000  | -1.798756000 | -0.948545000 |
| C | 2.339347000  | -1.975029000 | -0.683449000 |
| C | 3.042398000  | -1.294050000 | 0.353122000  |
| C | 2.377258000  | -0.355886000 | 1.203793000  |
| C | 3.144386000  | 0.280456000  | 2.203932000  |
| C | 4.491283000  | 0.005040000  | 2.350631000  |
| C | 5.144798000  | -0.919280000 | 1.516989000  |
| C | 4.417559000  | -1.556517000 | 0.533528000  |
| O | 1.107174000  | -0.070011000 | 1.094290000  |



|    |              |              |              |
|----|--------------|--------------|--------------|
| Al | -0.195004000 | -0.478698000 | -0.106750000 |
| O  | -1.450005000 | 0.082699000  | 1.097777000  |
| H  | 2.915715000  | -2.686871000 | -1.291695000 |
| H  | -3.381910000 | -2.558904000 | -1.137999000 |
| H  | 4.896841000  | -2.275222000 | -0.129491000 |
| H  | 6.202481000  | -1.123895000 | 1.644558000  |
| H  | 5.054760000  | 0.516338000  | 3.127040000  |
| H  | -5.456365000 | 1.568365000  | 2.442127000  |
| H  | -6.675584000 | -0.019444000 | 0.959541000  |
| H  | 2.639062000  | 0.993921000  | 2.847054000  |
| H  | -2.979493000 | 1.594813000  | 2.498025000  |
| H  | -5.379388000 | -1.589218000 | -0.464108000 |
| H  | 1.062938000  | -3.348919000 | -2.403850000 |
| H  | 0.292469000  | -1.806870000 | -2.863180000 |
| H  | -1.569672000 | -3.296149000 | -2.326278000 |
| H  | -0.750298000 | -3.859552000 | -0.858117000 |
| C  | 0.363106000  | 1.793553000  | -1.754816000 |
| C  | 1.840532000  | 1.533464000  | -2.003473000 |
| O  | -0.338690000 | 0.620825000  | -1.462753000 |
| H  | -0.072294000 | 2.240825000  | -2.664254000 |
| H  | 2.366843000  | 2.446347000  | -2.296952000 |
| C  | 0.127337000  | 2.764332000  | -0.602382000 |
| H  | -0.942776000 | 2.888506000  | -0.425326000 |
| H  | 0.603395000  | 2.402928000  | 0.315475000  |
| Cl | 0.798784000  | 4.409392000  | -0.933407000 |
| H  | 1.961155000  | 0.792614000  | -2.800076000 |
| H  | 2.323351000  | 1.143669000  | -1.098406000 |

56

B\_INT4 E = -1967.1044395

|   |              |              |              |
|---|--------------|--------------|--------------|
| C | -0.509538000 | -0.992711000 | 3.073020000  |
| C | 0.702280000  | -1.857547000 | 2.732892000  |
| N | 1.351227000  | -1.264330000 | 1.576329000  |
| C | 2.637512000  | -1.323043000 | 1.437608000  |
| C | 3.357063000  | -0.829059000 | 0.304984000  |
| C | 2.689931000  | -0.322693000 | -0.859651000 |
| C | 3.497285000  | 0.091299000  | -1.943670000 |
| C | 4.876706000  | 0.025444000  | -1.878482000 |
| C | 5.530204000  | -0.468996000 | -0.736783000 |
| C | 4.767098000  | -0.893378000 | 0.331351000  |
| N | -1.163674000 | -0.671949000 | 1.818622000  |
| C | -2.446729000 | -0.750245000 | 1.690011000  |
| C | -3.158050000 | -0.427385000 | 0.490001000  |
| C | -2.497983000 | 0.105782000  | -0.665136000 |
| C | -3.300685000 | 0.426926000  | -1.784232000 |

|    |              |              |              |
|----|--------------|--------------|--------------|
| C  | -4.667142000 | 0.214382000  | -1.774276000 |
| C  | -5.311663000 | -0.321813000 | -0.647201000 |
| C  | -4.554489000 | -0.625846000 | 0.466665000  |
| O  | -1.211400000 | 0.313515000  | -0.730657000 |
| Al | 0.160802000  | -0.146152000 | 0.397727000  |
| O  | 1.390073000  | -0.264902000 | -0.970736000 |
| H  | -3.051550000 | -1.076905000 | 2.548690000  |
| H  | 3.237221000  | -1.793207000 | 2.230785000  |
| H  | -5.029999000 | -1.029510000 | 1.359576000  |
| H  | -6.384552000 | -0.482697000 | -0.648774000 |
| H  | -5.250653000 | 0.470182000  | -2.655347000 |
| H  | 5.464658000  | 0.364403000  | -2.727975000 |
| H  | 6.613350000  | -0.516575000 | -0.697954000 |
| H  | -2.800451000 | 0.844323000  | -2.653257000 |
| H  | 2.991763000  | 0.476119000  | -2.824280000 |
| H  | 5.246410000  | -1.285892000 | 1.227184000  |
| H  | -1.185172000 | -1.496591000 | 3.776334000  |
| H  | -0.167306000 | -0.051200000 | 3.521948000  |
| H  | 1.387303000  | -1.953649000 | 3.585061000  |
| H  | 0.358579000  | -2.865706000 | 2.459029000  |
| C  | 0.274891000  | 2.661102000  | 1.084115000  |
| C  | -1.173403000 | 2.858109000  | 1.509122000  |
| O  | 0.697118000  | 1.339281000  | 1.209909000  |
| H  | 0.911246000  | 3.294257000  | 1.727826000  |
| H  | -1.464103000 | 3.912275000  | 1.471312000  |
| C  | 0.524273000  | 3.085362000  | -0.359774000 |
| H  | 1.562617000  | 2.889999000  | -0.634875000 |
| H  | -0.139495000 | 2.549467000  | -1.044533000 |
| Cl | 0.240973000  | 4.854947000  | -0.626580000 |
| H  | -1.312250000 | 2.498627000  | 2.533854000  |
| H  | -1.849764000 | 2.296096000  | 0.854851000  |
| C  | -0.622306000 | -2.462428000 | -1.733999000 |
| C  | -1.885652000 | -3.154643000 | -2.130178000 |
| O  | -0.447535000 | -2.268211000 | -0.309396000 |
| H  | -0.345649000 | -1.567680000 | -2.292630000 |
| H  | -1.828837000 | -3.484220000 | -3.171665000 |
| C  | 0.454283000  | -3.135058000 | -1.013531000 |
| H  | 1.472482000  | -2.758402000 | -1.091908000 |
| H  | 0.345446000  | -4.186196000 | -0.746864000 |
| H  | -2.741504000 | -2.478032000 | -2.040753000 |
| H  | -2.068984000 | -4.028280000 | -1.498971000 |

57

B\_TS2 E = -2427.3719402 Imaginary Frequency= 403.3567

|   |              |             |             |
|---|--------------|-------------|-------------|
| C | -0.711197000 | 0.010961000 | 3.282220000 |
|---|--------------|-------------|-------------|

|    |              |              |              |
|----|--------------|--------------|--------------|
| C  | 0.688865000  | -0.600206000 | 3.198942000  |
| N  | 1.294060000  | -0.139643000 | 1.967756000  |
| C  | 2.547362000  | 0.162197000  | 1.906347000  |
| C  | 3.231996000  | 0.568686000  | 0.715546000  |
| C  | 2.604315000  | 0.559444000  | -0.578354000 |
| C  | 3.406905000  | 0.935503000  | -1.684906000 |
| C  | 4.728454000  | 1.304782000  | -1.529978000 |
| C  | 5.338676000  | 1.315205000  | -0.263647000 |
| C  | 4.587250000  | 0.941281000  | 0.832228000  |
| N  | -1.326951000 | -0.151365000 | 1.983250000  |
| C  | -2.546948000 | -0.542585000 | 1.854405000  |
| C  | -3.215702000 | -0.707656000 | 0.594816000  |
| C  | -2.615810000 | -0.327918000 | -0.655376000 |
| C  | -3.401145000 | -0.499140000 | -1.823799000 |
| C  | -4.673539000 | -1.035032000 | -1.772272000 |
| C  | -5.251130000 | -1.419218000 | -0.550599000 |
| C  | -4.520044000 | -1.241001000 | 0.608270000  |
| O  | -1.425769000 | 0.180234000  | -0.766443000 |
| Al | -0.015394000 | 0.161391000  | 0.450586000  |
| O  | 1.373426000  | 0.200712000  | -0.781473000 |
| H  | -3.140936000 | -0.765882000 | 2.755534000  |
| H  | 3.157879000  | 0.100318000  | 2.821295000  |
| H  | -4.946091000 | -1.519543000 | 1.572237000  |
| H  | -6.250792000 | -1.841248000 | -0.517651000 |
| H  | -5.234416000 | -1.162094000 | -2.695932000 |
| H  | 5.307099000  | 1.586420000  | -2.407287000 |
| H  | 6.380397000  | 1.599766000  | -0.152478000 |
| H  | -2.950552000 | -0.205692000 | -2.767570000 |
| H  | 2.937104000  | 0.916730000  | -2.663746000 |
| H  | 5.036193000  | 0.926106000  | 1.825412000  |
| H  | -1.307231000 | -0.446367000 | 4.085462000  |
| H  | -0.618640000 | 1.088214000  | 3.476417000  |
| H  | 1.295790000  | -0.346412000 | 4.080021000  |
| H  | 0.597928000  | -1.694680000 | 3.146376000  |
| C  | -0.603503000 | 3.046477000  | 0.431301000  |
| C  | -2.090309000 | 3.026461000  | 0.773482000  |
| O  | 0.077515000  | 1.929878000  | 0.878929000  |
| H  | -0.165464000 | 3.948036000  | 0.904858000  |
| H  | -2.583797000 | 3.959507000  | 0.480777000  |
| C  | -0.352785000 | 3.170141000  | -1.069036000 |
| H  | 0.718599000  | 3.150483000  | -1.275334000 |
| H  | -0.848090000 | 2.367797000  | -1.621274000 |
| Cl | -0.973908000 | 4.742408000  | -1.760999000 |
| H  | -2.216837000 | 2.891709000  | 1.853158000  |

|    |              |              |              |
|----|--------------|--------------|--------------|
| H  | -2.596495000 | 2.197847000  | 0.267005000  |
| C  | 0.018421000  | -2.566401000 | -0.846869000 |
| C  | -1.030969000 | -3.617961000 | -1.046169000 |
| O  | -0.098887000 | -1.815318000 | 0.370411000  |
| H  | 0.181502000  | -1.926164000 | -1.719773000 |
| H  | -0.704695000 | -4.305036000 | -1.832158000 |
| C  | 1.207676000  | -2.868660000 | -0.081400000 |
| H  | 2.085657000  | -2.246983000 | -0.179173000 |
| H  | 1.173899000  | -3.638441000 | 0.674170000  |
| Cl | 2.432205000  | -4.682788000 | -1.389299000 |
| H  | -1.990973000 | -3.171095000 | -1.326424000 |
| H  | -1.169036000 | -4.194044000 | -0.125833000 |

57

B\_INT5 E = -2427.4000556

|    |              |              |              |
|----|--------------|--------------|--------------|
| C  | -0.743719000 | 0.387440000  | 3.303467000  |
| C  | 0.551000000  | -0.430153000 | 3.311655000  |
| N  | 1.244851000  | -0.167787000 | 2.071777000  |
| C  | 2.524339000  | -0.040844000 | 2.027774000  |
| C  | 3.286160000  | 0.168281000  | 0.828228000  |
| C  | 2.695254000  | 0.149194000  | -0.486188000 |
| C  | 3.580545000  | 0.330925000  | -1.583798000 |
| C  | 4.936512000  | 0.524533000  | -1.407104000 |
| C  | 5.506859000  | 0.542508000  | -0.122631000 |
| C  | 4.675483000  | 0.358694000  | 0.966177000  |
| N  | -1.364238000 | 0.188250000  | 2.015371000  |
| C  | -2.621619000 | -0.044987000 | 1.888145000  |
| C  | -3.283962000 | -0.248888000 | 0.628262000  |
| C  | -2.627941000 | -0.056945000 | -0.639926000 |
| C  | -3.415219000 | -0.267704000 | -1.803214000 |
| C  | -4.738942000 | -0.656287000 | -1.730778000 |
| C  | -5.373168000 | -0.844685000 | -0.491413000 |
| C  | -4.639880000 | -0.628821000 | 0.660728000  |
| O  | -1.397812000 | 0.327265000  | -0.773351000 |
| Al | -0.007860000 | 0.095549000  | 0.476756000  |
| O  | 1.440055000  | -0.053735000 | -0.718073000 |
| H  | -3.259690000 | -0.095811000 | 2.787014000  |
| H  | 3.104826000  | -0.102471000 | 2.964077000  |
| H  | -5.107105000 | -0.759203000 | 1.637512000  |
| H  | -6.414578000 | -1.148227000 | -0.439691000 |
| H  | -5.297045000 | -0.818434000 | -2.651219000 |
| H  | 5.572091000  | 0.662613000  | -2.280064000 |
| H  | 6.574268000  | 0.691836000  | 0.010413000  |
| H  | -2.922127000 | -0.123693000 | -2.760563000 |
| H  | 3.138872000  | 0.311847000  | -2.576250000 |

|    |              |              |              |
|----|--------------|--------------|--------------|
| H  | 5.089298000  | 0.359782000  | 1.975331000  |
| H  | -1.406011000 | 0.104374000  | 4.136225000  |
| H  | -0.491035000 | 1.452858000  | 3.394371000  |
| H  | 1.170308000  | -0.202040000 | 4.192788000  |
| H  | 0.291731000  | -1.498107000 | 3.329780000  |
| C  | -0.163011000 | 3.057266000  | 0.240477000  |
| C  | -1.638381000 | 3.288160000  | 0.560959000  |
| O  | 0.343677000  | 1.890541000  | 0.771377000  |
| H  | 0.401285000  | 3.919963000  | 0.653245000  |
| H  | -1.984645000 | 4.259409000  | 0.189862000  |
| C  | 0.109494000  | 3.035893000  | -1.261470000 |
| H  | 1.166818000  | 2.843440000  | -1.450121000 |
| H  | -0.499513000 | 2.282078000  | -1.765283000 |
| Cl | -0.262574000 | 4.635663000  | -2.076556000 |
| H  | -1.785916000 | 3.259945000  | 1.646305000  |
| H  | -2.260937000 | 2.505930000  | 0.114976000  |
| C  | -0.269699000 | -2.598535000 | -0.517171000 |
| C  | -1.432494000 | -3.581465000 | -0.488684000 |
| O  | -0.333580000 | -1.735385000 | 0.561847000  |
| H  | -0.286319000 | -2.063417000 | -1.488714000 |
| H  | -1.394077000 | -4.293990000 | -1.320019000 |
| C  | 1.081892000  | -3.293991000 | -0.395604000 |
| H  | 1.889870000  | -2.562457000 | -0.433932000 |
| H  | 1.134341000  | -3.860892000 | 0.538642000  |
| Cl | 1.432943000  | -4.498125000 | -1.734633000 |
| H  | -2.379039000 | -3.033378000 | -0.538592000 |
| H  | -1.419807000 | -4.142508000 | 0.454508000  |

66

B\_TS3 E= -2806.6611585 Imaginary Frequency= 177.6980

|   |              |              |              |
|---|--------------|--------------|--------------|
| C | -0.303581000 | -1.131283000 | 3.083311000  |
| C | -0.258923000 | 0.389111000  | 3.255412000  |
| N | -0.716662000 | 1.010187000  | 2.018672000  |
| C | -1.200796000 | 2.209298000  | 2.062538000  |
| C | -1.734086000 | 2.934036000  | 0.952461000  |
| C | -1.817331000 | 2.372532000  | -0.367004000 |
| C | -2.388609000 | 3.186930000  | -1.380668000 |
| C | -2.839757000 | 4.463881000  | -1.112939000 |
| C | -2.756382000 | 5.011312000  | 0.180380000  |
| C | -2.210029000 | 4.241818000  | 1.187359000  |
| N | 0.014775000  | -1.450178000 | 1.705484000  |
| C | 0.741726000  | -2.481178000 | 1.408994000  |
| C | 1.002934000  | -2.911199000 | 0.073148000  |
| C | 0.292250000  | -2.360446000 | -1.046426000 |
| C | 0.599088000  | -2.878430000 | -2.327580000 |

|    |              |              |              |
|----|--------------|--------------|--------------|
| C  | 1.553092000  | -3.860848000 | -2.491573000 |
| C  | 2.247091000  | -4.403217000 | -1.392284000 |
| C  | 1.960473000  | -3.930181000 | -0.129756000 |
| O  | -0.637921000 | -1.461837000 | -0.924008000 |
| Al | -0.867879000 | -0.213302000 | 0.390040000  |
| O  | -1.384978000 | 1.195426000  | -0.678558000 |
| H  | 1.191697000  | -3.069419000 | 2.221346000  |
| H  | -1.228017000 | 2.734173000  | 3.030289000  |
| H  | 2.485722000  | -4.319944000 | 0.741887000  |
| H  | 2.998938000  | -5.172619000 | -1.539162000 |
| H  | 1.782055000  | -4.214337000 | -3.494699000 |
| H  | -3.267132000 | 5.055874000  | -1.919680000 |
| H  | -3.113871000 | 6.016501000  | 0.380685000  |
| H  | 0.087249000  | -2.433603000 | -3.173942000 |
| H  | -2.448866000 | 2.761174000  | -2.378274000 |
| H  | -2.134077000 | 4.637445000  | 2.200237000  |
| H  | 0.378435000  | -1.630614000 | 3.785787000  |
| H  | -1.327144000 | -1.480134000 | 3.272590000  |
| H  | -0.875111000 | 0.701800000  | 4.108571000  |
| H  | 0.771511000  | 0.711869000  | 3.464369000  |
| C  | -3.442276000 | -1.577461000 | 0.624802000  |
| C  | -2.944188000 | -3.004764000 | 0.826234000  |
| O  | -2.524288000 | -0.615016000 | 1.015017000  |
| H  | -4.364822000 | -1.454768000 | 1.226041000  |
| H  | -3.714643000 | -3.739563000 | 0.569287000  |
| C  | -3.816018000 | -1.290609000 | -0.826753000 |
| H  | -4.121172000 | -0.248525000 | -0.937176000 |
| H  | -2.982124000 | -1.501489000 | -1.500830000 |
| Cl | -5.225095000 | -2.297925000 | -1.400727000 |
| H  | -2.663111000 | -3.154614000 | 1.874525000  |
| H  | -2.062450000 | -3.197347000 | 0.206612000  |
| C  | 2.185030000  | 0.592405000  | 0.917846000  |
| C  | 2.592488000  | 1.998559000  | 1.322076000  |
| O  | 1.225209000  | 0.495452000  | -0.134479000 |
| H  | 1.647706000  | 0.170173000  | 1.766215000  |
| H  | 3.085218000  | 1.952245000  | 2.301012000  |
| C  | 3.377082000  | -0.343482000 | 0.696009000  |
| H  | 3.132181000  | -1.132287000 | -0.016919000 |
| H  | 4.291074000  | 0.159729000  | 0.388669000  |
| Cl | 3.787673000  | -1.187997000 | 2.276431000  |
| H  | 1.711308000  | 2.642085000  | 1.408542000  |
| H  | 3.293629000  | 2.462571000  | 0.627303000  |
| C  | 1.299635000  | 2.439924000  | -1.742041000 |
| C  | 1.526945000  | 0.965703000  | -1.615037000 |

|   |             |             |              |
|---|-------------|-------------|--------------|
| C | 2.417673000 | 3.150842000 | -1.885702000 |
| C | 3.626788000 | 2.295345000 | -1.746188000 |
| O | 4.782940000 | 2.715530000 | -1.786790000 |
| O | 3.280588000 | 1.045837000 | -1.536020000 |
| O | 1.138521000 | 0.170030000 | -2.444609000 |
| H | 0.280372000 | 2.805736000 | -1.811113000 |
| H | 2.494780000 | 4.216460000 | -2.072858000 |

66

B\_INT6 E **==2806.7000981**

|    |              |              |              |
|----|--------------|--------------|--------------|
| C  | -0.776988000 | -0.715487000 | 2.955591000  |
| C  | 0.621691000  | -0.239923000 | 2.566613000  |
| N  | 0.488952000  | 0.609095000  | 1.402791000  |
| C  | 1.265673000  | 1.627474000  | 1.235794000  |
| C  | 1.268080000  | 2.476960000  | 0.085170000  |
| C  | 0.421734000  | 2.248736000  | -1.056812000 |
| C  | 0.562216000  | 3.150882000  | -2.145080000 |
| C  | 1.467991000  | 4.191904000  | -2.116425000 |
| C  | 2.299468000  | 4.405204000  | -1.002179000 |
| C  | 2.187642000  | 3.546546000  | 0.073585000  |
| N  | -1.451582000 | -1.114819000 | 1.739197000  |
| C  | -2.201105000 | -2.160657000 | 1.696528000  |
| C  | -2.954958000 | -2.569818000 | 0.545857000  |
| C  | -3.052075000 | -1.756303000 | -0.637197000 |
| C  | -3.883618000 | -2.243945000 | -1.679999000 |
| C  | -4.551576000 | -3.448636000 | -1.576870000 |
| C  | -4.447235000 | -4.242814000 | -0.422039000 |
| C  | -3.660965000 | -3.786767000 | 0.619069000  |
| O  | -2.470873000 | -0.608513000 | -0.778330000 |
| Al | -1.054485000 | 0.152323000  | 0.175010000  |
| O  | -0.436387000 | 1.287129000  | -1.148167000 |
| H  | -2.303172000 | -2.790009000 | 2.596577000  |
| H  | 2.006189000  | 1.865885000  | 2.015078000  |
| H  | -3.571659000 | -4.372335000 | 1.534672000  |
| H  | -4.978843000 | -5.186624000 | -0.346558000 |
| H  | -5.171674000 | -3.784614000 | -2.405927000 |
| H  | 1.541730000  | 4.855592000  | -2.976157000 |
| H  | 3.015989000  | 5.221070000  | -0.991271000 |
| H  | -3.966853000 | -1.627830000 | -2.570560000 |
| H  | -0.073254000 | 2.980190000  | -3.009346000 |
| H  | 2.826204000  | 3.675683000  | 0.948434000  |
| H  | -0.742490000 | -1.527171000 | 3.697746000  |
| H  | -1.333947000 | 0.131228000  | 3.379168000  |
| H  | 1.128151000  | 0.269993000  | 3.398548000  |
| H  | 1.232425000  | -1.114943000 | 2.292686000  |

|    |              |              |              |
|----|--------------|--------------|--------------|
| C  | -3.265367000 | 1.937621000  | 0.997450000  |
| C  | -4.307715000 | 0.937181000  | 1.490967000  |
| O  | -1.971536000 | 1.463694000  | 1.074852000  |
| H  | -3.356145000 | 2.846709000  | 1.626938000  |
| H  | -5.313182000 | 1.372302000  | 1.501427000  |
| C  | -3.515057000 | 2.374358000  | -0.443692000 |
| H  | -2.735662000 | 3.064421000  | -0.770555000 |
| H  | -3.551184000 | 1.515867000  | -1.118744000 |
| Cl | -5.100273000 | 3.266167000  | -0.647956000 |
| H  | -4.057063000 | 0.620145000  | 2.509332000  |
| H  | -4.325954000 | 0.046367000  | 0.854445000  |
| C  | 4.817966000  | -1.195258000 | 0.369316000  |
| C  | 3.956999000  | -2.139164000 | 1.176905000  |
| O  | 4.915015000  | -1.407170000 | -1.056193000 |
| H  | 5.860841000  | -1.319282000 | 0.690539000  |
| H  | 4.172038000  | -1.967297000 | 2.235694000  |
| C  | 4.442427000  | 0.270797000  | 0.539288000  |
| H  | 5.068362000  | 0.903172000  | -0.090354000 |
| H  | 3.390291000  | 0.443910000  | 0.304769000  |
| Cl | 4.728957000  | 0.794612000  | 2.249987000  |
| H  | 4.178668000  | -3.183889000 | 0.946535000  |
| H  | 2.893127000  | -1.963659000 | 1.013202000  |
| C  | 3.011207000  | -2.975223000 | -1.547996000 |
| C  | 4.016901000  | -1.940193000 | -1.929999000 |
| C  | 1.738072000  | -2.764826000 | -1.201381000 |
| C  | 1.230060000  | -1.392986000 | -0.895175000 |
| O  | 0.017566000  | -1.357052000 | -0.477284000 |
| O  | 2.024625000  | -0.443820000 | -1.019831000 |
| O  | 4.217596000  | -1.738656000 | -3.108432000 |
| H  | 3.359333000  | -3.986790000 | -1.755417000 |
| H  | 1.049954000  | -3.600344000 | -1.091145000 |

46

B\_INT7 E = -1773.9832677

|   |              |              |              |
|---|--------------|--------------|--------------|
| C | -0.434274000 | -2.510045000 | 2.044477000  |
| C | 0.918617000  | -2.976779000 | 1.524709000  |
| N | 1.482007000  | -1.886493000 | 0.736501000  |
| C | 2.776865000  | -1.805782000 | 0.613155000  |
| C | 3.466685000  | -0.855006000 | -0.185745000 |
| C | 2.756379000  | 0.054161000  | -1.035380000 |
| C | 3.521079000  | 0.917493000  | -1.854558000 |
| C | 4.901201000  | 0.897851000  | -1.814077000 |
| C | 5.599283000  | 0.010344000  | -0.972718000 |
| C | 4.880500000  | -0.855883000 | -0.178707000 |
| N | -1.068965000 | -1.799739000 | 0.949354000  |



|    |              |              |              |
|----|--------------|--------------|--------------|
| C  | -2.324031000 | -1.984845000 | 0.680809000  |
| C  | -3.028552000 | -1.309934000 | -0.358733000 |
| C  | -2.367144000 | -0.368850000 | -1.208993000 |
| C  | -3.136250000 | 0.263316000  | -2.210298000 |
| C  | -4.481300000 | -0.019688000 | -2.359093000 |
| C  | -5.131050000 | -0.947717000 | -1.526516000 |
| C  | -4.401796000 | -1.580384000 | -0.541323000 |
| O  | -1.098617000 | -0.076766000 | -1.098253000 |
| Al | 0.203041000  | -0.474164000 | 0.107642000  |
| O  | 1.457911000  | 0.091221000  | -1.095616000 |
| H  | -2.897593000 | -2.699108000 | 1.288987000  |
| H  | 3.398627000  | -2.535237000 | 1.150617000  |
| H  | -4.878317000 | -2.301382000 | 0.121125000  |
| H  | -6.187278000 | -1.158646000 | -1.656121000 |
| H  | -5.046502000 | 0.488451000  | -3.136487000 |
| H  | 5.459598000  | 1.582817000  | -2.447262000 |
| H  | 6.683983000  | 0.007789000  | -0.955261000 |
| H  | -2.633829000 | 0.979414000  | -2.852682000 |
| H  | 2.982800000  | 1.600004000  | -2.504547000 |
| H  | 5.392818000  | -1.560798000 | 0.474374000  |
| H  | -1.044403000 | -3.346020000 | 2.408745000  |
| H  | -0.286011000 | -1.797635000 | 2.866586000  |
| H  | 1.588318000  | -3.274463000 | 2.340798000  |
| H  | 0.777642000  | -3.849952000 | 0.872502000  |
| C  | -0.384315000 | 1.792895000  | 1.753216000  |
| C  | -1.857052000 | 1.510169000  | 2.005638000  |
| O  | 0.334769000  | 0.630998000  | 1.460154000  |
| H  | 0.046359000  | 2.247324000  | 2.661397000  |
| H  | -2.396484000 | 2.414847000  | 2.300026000  |
| C  | -0.166699000 | 2.767128000  | 0.600021000  |
| H  | 0.900789000  | 2.907578000  | 0.419830000  |
| H  | -0.640141000 | 2.398821000  | -0.316426000 |
| Cl | -0.861900000 | 4.401706000  | 0.933691000  |
| H  | -1.964273000 | 0.768044000  | 2.803000000  |
| H  | -2.335993000 | 1.112628000  | 1.102151000  |

56

B\_INT8 E = -1967.1008537

|   |              |              |              |
|---|--------------|--------------|--------------|
| C | -0.553043000 | -1.306932000 | 2.912401000  |
| C | 0.780857000  | -1.955155000 | 2.552164000  |
| N | 1.368699000  | -1.167274000 | 1.483425000  |
| C | 2.651791000  | -0.999244000 | 1.416792000  |
| C | 3.324971000  | -0.300856000 | 0.368388000  |
| C | 2.630204000  | 0.167255000  | -0.795734000 |
| C | 3.399992000  | 0.780252000  | -1.810438000 |

|    |              |              |              |
|----|--------------|--------------|--------------|
| C  | 4.766516000  | 0.941846000  | -1.675797000 |
| C  | 5.446125000  | 0.487895000  | -0.532343000 |
| C  | 4.722992000  | -0.131218000 | 0.466075000  |
| N  | -1.205250000 | -0.969474000 | 1.660906000  |
| C  | -2.468079000 | -1.186771000 | 1.488162000  |
| C  | -3.188241000 | -0.861182000 | 0.296776000  |
| C  | -2.560845000 | -0.206521000 | -0.811908000 |
| C  | -3.365497000 | 0.086743000  | -1.936159000 |
| C  | -4.707000000 | -0.247768000 | -1.966033000 |
| C  | -5.322161000 | -0.890174000 | -0.878649000 |
| C  | -4.560262000 | -1.184049000 | 0.234081000  |
| O  | -1.300922000 | 0.135142000  | -0.829418000 |
| Al | 0.069507000  | -0.136898000 | 0.348817000  |
| O  | 1.345397000  | 0.012365000  | -0.970416000 |
| H  | -3.046236000 | -1.645173000 | 2.303692000  |
| H  | 3.286221000  | -1.433748000 | 2.203259000  |
| H  | -5.011422000 | -1.675722000 | 1.094885000  |
| H  | -6.376395000 | -1.144065000 | -0.911561000 |
| H  | -5.294818000 | -0.003941000 | -2.847613000 |
| H  | 5.323706000  | 1.430487000  | -2.471379000 |
| H  | 6.518992000  | 0.619482000  | -0.439642000 |
| H  | -2.890516000 | 0.590129000  | -2.772989000 |
| H  | 2.874299000  | 1.132729000  | -2.692786000 |
| H  | 5.224275000  | -0.501289000 | 1.359399000  |
| H  | -1.171225000 | -1.963579000 | 3.538006000  |
| H  | -0.365618000 | -0.372654000 | 3.457860000  |
| H  | 1.447100000  | -2.032991000 | 3.420924000  |
| H  | 0.596528000  | -2.971674000 | 2.174012000  |
| C  | -0.282651000 | 2.596634000  | 1.204870000  |
| C  | -1.755726000 | 2.531311000  | 1.581295000  |
| O  | 0.342307000  | 1.352397000  | 1.269626000  |
| H  | 0.223853000  | 3.279105000  | 1.910105000  |
| H  | -2.212467000 | 3.525436000  | 1.596145000  |
| C  | -0.061449000 | 3.146770000  | -0.200651000 |
| H  | 1.002763000  | 3.138886000  | -0.444356000 |
| H  | -0.607232000 | 2.555127000  | -0.941826000 |
| Cl | -0.621396000 | 4.860112000  | -0.375180000 |
| H  | -1.865742000 | 2.085514000  | 2.575152000  |
| H  | -2.312472000 | 1.913906000  | 0.866460000  |
| C  | 0.474614000  | -3.416965000 | -1.247947000 |
| C  | 1.962208000  | -3.365903000 | -1.110550000 |
| O  | -0.293126000 | -2.387635000 | -0.594785000 |
| H  | 0.018060000  | -4.400179000 | -1.114229000 |
| H  | 2.427860000  | -4.035373000 | -1.839984000 |

|   |              |              |              |
|---|--------------|--------------|--------------|
| C | -0.278325000 | -2.438863000 | -2.027484000 |
| H | -1.236042000 | -2.705311000 | -2.472500000 |
| H | 0.252731000  | -1.605267000 | -2.485793000 |
| H | 2.281020000  | -3.690544000 | -0.114774000 |
| H | 2.337580000  | -2.355064000 | -1.281288000 |

76

B\_TS4 E = -2999.7771512 Imaginary Frequency=436.3206

|    |              |              |              |
|----|--------------|--------------|--------------|
| C  | -2.329087000 | -0.459242000 | 3.299330000  |
| C  | -1.168565000 | 0.531533000  | 3.373589000  |
| N  | -1.126456000 | 1.255051000  | 2.119397000  |
| C  | -0.733997000 | 2.482929000  | 2.072471000  |
| C  | -0.572634000 | 3.244963000  | 0.869906000  |
| C  | -0.731765000 | 2.666486000  | -0.436511000 |
| C  | -0.478760000 | 3.510296000  | -1.549329000 |
| C  | -0.104362000 | 4.830073000  | -1.389014000 |
| C  | 0.047762000  | 5.392987000  | -0.110096000 |
| C  | -0.181376000 | 4.593742000  | 0.992723000  |
| N  | -2.253950000 | -1.112483000 | 2.009768000  |
| C  | -2.478705000 | -2.373829000 | 1.874866000  |
| C  | -2.468154000 | -3.069087000 | 0.619697000  |
| C  | -2.326376000 | -2.388183000 | -0.638814000 |
| C  | -2.349833000 | -3.187961000 | -1.809064000 |
| C  | -2.487434000 | -4.561314000 | -1.747423000 |
| C  | -2.627013000 | -5.223582000 | -0.516364000 |
| C  | -2.622104000 | -4.470320000 | 0.641286000  |
| O  | -2.196357000 | -1.101297000 | -0.758411000 |
| Al | -1.758067000 | 0.176835000  | 0.517713000  |
| O  | -1.060786000 | 1.431871000  | -0.647638000 |
| H  | -2.705658000 | -2.979610000 | 2.767086000  |
| H  | -0.481469000 | 3.000578000  | 3.011583000  |
| H  | -2.730908000 | -4.955702000 | 1.611210000  |
| H  | -2.733124000 | -6.303011000 | -0.476376000 |
| H  | -2.483599000 | -5.136966000 | -2.670320000 |
| H  | 0.080296000  | 5.440740000  | -2.270481000 |
| H  | 0.350125000  | 6.428931000  | 0.007533000  |
| H  | -2.238095000 | -2.674852000 | -2.759839000 |
| H  | -0.591500000 | 3.070545000  | -2.536509000 |
| H  | -0.054541000 | 4.997598000  | 1.997302000  |
| H  | -2.304863000 | -1.178394000 | 4.130833000  |
| H  | -3.276502000 | 0.095413000  | 3.335795000  |
| H  | -1.264047000 | 1.205388000  | 4.236898000  |
| H  | -0.228051000 | -0.028150000 | 3.473515000  |
| C  | -4.579093000 | 0.906720000  | 0.089219000  |
| C  | -5.265515000 | -0.434721000 | 0.328461000  |

|    |              |              |              |
|----|--------------|--------------|--------------|
| O  | -3.360870000 | 1.020137000  | 0.732793000  |
| H  | -5.258235000 | 1.699240000  | 0.462786000  |
| H  | -6.262009000 | -0.465436000 | -0.125147000 |
| C  | -4.348430000 | 1.186070000  | -1.393575000 |
| H  | -3.827053000 | 2.136082000  | -1.522338000 |
| H  | -3.771278000 | 0.385369000  | -1.862972000 |
| Cl | -5.906639000 | 1.329147000  | -2.334363000 |
| H  | -5.370082000 | -0.606851000 | 1.405298000  |
| H  | -4.673835000 | -1.255885000 | -0.090004000 |
| C  | 1.224654000  | -0.726805000 | -0.001718000 |
| C  | 1.210524000  | -0.300692000 | -1.446244000 |
| O  | 0.031761000  | -0.669324000 | 0.755096000  |
| H  | 2.068283000  | -0.282413000 | 0.550074000  |
| H  | 2.071822000  | -0.753263000 | -1.952729000 |
| C  | 0.986624000  | -2.134788000 | 0.280174000  |
| H  | 1.218162000  | -2.542923000 | 1.253635000  |
| H  | 0.317261000  | -2.684093000 | -0.369029000 |
| H  | 1.264387000  | 0.786217000  | -1.541909000 |
| H  | 0.294532000  | -0.643405000 | -1.936859000 |
| C  | 4.698054000  | 0.686042000  | -0.783089000 |
| C  | 4.598468000  | 1.199618000  | -2.196544000 |
| O  | 6.013037000  | 0.103695000  | -0.639244000 |
| H  | 3.938018000  | -0.079955000 | -0.616482000 |
| H  | 3.630748000  | 1.682943000  | -2.355781000 |
| C  | 4.599632000  | 1.756904000  | 0.290546000  |
| H  | 4.739118000  | 1.316538000  | 1.281505000  |
| H  | 5.348193000  | 2.538471000  | 0.135125000  |
| Cl | 2.986915000  | 2.553336000  | 0.300257000  |
| H  | 4.691661000  | 0.361605000  | -2.890090000 |
| H  | 5.392702000  | 1.924131000  | -2.404134000 |
| C  | 5.169234000  | -1.426247000 | 1.114186000  |
| C  | 6.217635000  | -0.985168000 | 0.147168000  |
| C  | 4.079441000  | -2.158874000 | 0.855228000  |
| C  | 3.675669000  | -2.574061000 | -0.537785000 |
| O  | 2.547925000  | -3.168514000 | -0.653916000 |
| O  | 4.470664000  | -2.293599000 | -1.456243000 |
| O  | 7.327498000  | -1.472225000 | 0.176433000  |
| H  | 5.435443000  | -1.198675000 | 2.146551000  |
| H  | 3.457146000  | -2.486140000 | 1.689005000  |

76

B\_INT9 E = -2999.8151967

|   |              |              |             |
|---|--------------|--------------|-------------|
| C | -2.192477000 | -0.596256000 | 3.302493000 |
| C | -1.043462000 | 0.412613000  | 3.369998000 |
| N | -1.049652000 | 1.169179000  | 2.138536000 |

|    |              |              |              |
|----|--------------|--------------|--------------|
| C  | -0.804119000 | 2.433088000  | 2.128361000  |
| C  | -0.745532000 | 3.248785000  | 0.949440000  |
| C  | -0.865331000 | 2.705500000  | -0.378772000 |
| C  | -0.729074000 | 3.621539000  | -1.457577000 |
| C  | -0.500686000 | 4.967591000  | -1.248955000 |
| C  | -0.387919000 | 5.492599000  | 0.049893000  |
| C  | -0.507327000 | 4.626752000  | 1.120575000  |
| N  | -2.126150000 | -1.228731000 | 2.006254000  |
| C  | -2.262769000 | -2.497656000 | 1.856632000  |
| C  | -2.209779000 | -3.170338000 | 0.586478000  |
| C  | -2.178789000 | -2.462939000 | -0.667902000 |
| C  | -2.152343000 | -3.255848000 | -1.845963000 |
| C  | -2.136608000 | -4.637107000 | -1.798911000 |
| C  | -2.165513000 | -5.321319000 | -0.572618000 |
| C  | -2.213345000 | -4.578727000 | 0.593091000  |
| O  | -2.204839000 | -1.171650000 | -0.776823000 |
| Al | -1.618933000 | 0.081132000  | 0.503461000  |
| O  | -1.055975000 | 1.454811000  | -0.639148000 |
| H  | -2.431106000 | -3.136105000 | 2.740631000  |
| H  | -0.609752000 | 2.950485000  | 3.082937000  |
| H  | -2.246279000 | -5.082057000 | 1.559984000  |
| H  | -2.155669000 | -6.406589000 | -0.541017000 |
| H  | -2.101447000 | -5.200640000 | -2.729263000 |
| H  | -0.404334000 | 5.629964000  | -2.107361000 |
| H  | -0.205110000 | 6.551241000  | 0.207726000  |
| H  | -2.133050000 | -2.725527000 | -2.794199000 |
| H  | -0.813621000 | 3.212834000  | -2.461110000 |
| H  | -0.412498000 | 5.002549000  | 2.139950000  |
| H  | -2.142521000 | -1.324285000 | 4.126749000  |
| H  | -3.145328000 | -0.053043000 | 3.361505000  |
| H  | -1.123155000 | 1.059764000  | 4.256654000  |
| H  | -0.093801000 | -0.138544000 | 3.422693000  |
| C  | -4.491818000 | 0.788032000  | 0.190889000  |
| C  | -5.164734000 | -0.562632000 | 0.426762000  |
| O  | -3.254395000 | 0.901696000  | 0.788950000  |
| H  | -5.166898000 | 1.567352000  | 0.602441000  |
| H  | -6.177518000 | -0.587083000 | 0.009150000  |
| C  | -4.318550000 | 1.099994000  | -1.293482000 |
| H  | -3.815000000 | 2.059480000  | -1.421285000 |
| H  | -3.752121000 | 0.315529000  | -1.800531000 |
| Cl | -5.913745000 | 1.246520000  | -2.181543000 |
| H  | -5.229909000 | -0.755824000 | 1.503305000  |
| H  | -4.584166000 | -1.371498000 | -0.028206000 |
| C  | 1.094530000  | -1.034041000 | -0.196376000 |

|    |             |              |              |
|----|-------------|--------------|--------------|
| C  | 0.926622000 | -0.662473000 | -1.667742000 |
| O  | 0.045506000 | -0.755669000 | 0.628119000  |
| H  | 2.015665000 | -0.501031000 | 0.159388000  |
| H  | 1.804076000 | -0.973686000 | -2.249886000 |
| C  | 1.408402000 | -2.530006000 | -0.052070000 |
| H  | 1.457172000 | -2.807212000 | 1.008747000  |
| H  | 0.633635000 | -3.139662000 | -0.527526000 |
| H  | 0.789220000 | 0.415744000  | -1.773463000 |
| H  | 0.039201000 | -1.151914000 | -2.084391000 |
| C  | 4.614245000 | 0.820473000  | -0.909981000 |
| C  | 4.681371000 | 1.202911000  | -2.365611000 |
| O  | 5.929739000 | 0.318982000  | -0.553871000 |
| H  | 3.860045000 | 0.042354000  | -0.769102000 |
| H  | 3.720754000 | 1.613495000  | -2.685956000 |
| C  | 4.313446000 | 1.974180000  | 0.032109000  |
| H  | 4.383330000 | 1.645622000  | 1.072879000  |
| H  | 5.008618000 | 2.803095000  | -0.127723000 |
| Cl | 2.650850000 | 2.590433000  | -0.208617000 |
| H  | 4.904709000 | 0.321181000  | -2.969589000 |
| H  | 5.460351000 | 1.952934000  | -2.534485000 |
| C  | 4.959875000 | -0.980718000 | 1.308673000  |
| C  | 6.109256000 | -0.559602000 | 0.456647000  |
| C  | 3.933618000 | -1.777063000 | 0.977828000  |
| C  | 3.800513000 | -2.353141000 | -0.383618000 |
| O  | 2.631315000 | -2.905287000 | -0.738512000 |
| O  | 4.740968000 | -2.365326000 | -1.162306000 |
| O  | 7.234568000 | -0.911362000 | 0.739825000  |
| H  | 5.052909000 | -0.643292000 | 2.338950000  |
| H  | 3.194254000 | -2.026408000 | 1.733983000  |

66

B\_INT10 E = -2806.709387

|   |              |              |              |
|---|--------------|--------------|--------------|
| C | -1.241278000 | -0.819211000 | 3.019861000  |
| C | 0.078259000  | -0.075694000 | 2.817072000  |
| N | -0.087496000 | 0.795503000  | 1.669358000  |
| C | 0.441684000  | 1.970953000  | 1.645178000  |
| C | 0.394548000  | 2.858260000  | 0.517048000  |
| C | -0.162033000 | 2.471814000  | -0.749995000 |
| C | -0.078651000 | 3.419571000  | -1.803053000 |
| C | 0.515405000  | 4.655674000  | -1.625711000 |
| C | 1.069604000  | 5.023070000  | -0.388665000 |
| C | 1.004008000  | 4.119244000  | 0.656445000  |
| N | -1.671927000 | -1.299693000 | 1.723491000  |
| C | -2.169129000 | -2.477024000 | 1.575108000  |
| C | -2.640932000 | -3.007342000 | 0.326649000  |

|    |              |              |              |
|----|--------------|--------------|--------------|
| C  | -2.683289000 | -2.223284000 | -0.877318000 |
| C  | -3.216585000 | -2.851484000 | -2.032381000 |
| C  | -3.660850000 | -4.159766000 | -2.010761000 |
| C  | -3.610418000 | -4.924779000 | -0.833805000 |
| C  | -3.108736000 | -4.335620000 | 0.311737000  |
| O  | -2.306884000 | -0.984338000 | -0.951516000 |
| Al | -1.293456000 | 0.033030000  | 0.223527000  |
| O  | -0.677425000 | 1.306031000  | -0.992977000 |
| H  | -2.258835000 | -3.139750000 | 2.451162000  |
| H  | 0.997884000  | 2.327753000  | 2.522176000  |
| H  | -3.064813000 | -4.900200000 | 1.243384000  |
| H  | -3.961924000 | -5.952105000 | -0.822930000 |
| H  | -4.057573000 | -4.601387000 | -2.923076000 |
| H  | 0.556207000  | 5.351134000  | -2.462290000 |
| H  | 1.544659000  | 5.990796000  | -0.257840000 |
| H  | -3.257606000 | -2.257584000 | -2.940934000 |
| H  | -0.501145000 | 3.129419000  | -2.761429000 |
| H  | 1.447115000  | 4.363042000  | 1.621766000  |
| H  | -1.138755000 | -1.635986000 | 3.749012000  |
| H  | -2.001859000 | -0.113301000 | 3.381602000  |
| H  | 0.377384000  | 0.481467000  | 3.715623000  |
| H  | 0.870494000  | -0.800990000 | 2.578634000  |
| C  | -3.930882000 | 1.303481000  | 0.619598000  |
| C  | -4.782669000 | 0.092049000  | 0.988587000  |
| O  | -2.590097000 | 1.137457000  | 0.900483000  |
| H  | -4.317214000 | 2.168591000  | 1.196682000  |
| H  | -5.850010000 | 0.286041000  | 0.835117000  |
| C  | -4.051157000 | 1.670527000  | -0.857271000 |
| H  | -3.407405000 | 2.520577000  | -1.089035000 |
| H  | -3.789268000 | 0.825197000  | -1.498358000 |
| Cl | -5.745811000 | 2.177279000  | -1.328410000 |
| H  | -4.623293000 | -0.159512000 | 2.042785000  |
| H  | -4.503015000 | -0.779827000 | 0.387712000  |
| C  | 5.123884000  | -1.092407000 | -0.007339000 |
| C  | 5.450724000  | -2.381877000 | 0.701546000  |
| O  | 4.825863000  | -0.112791000 | 1.014036000  |
| H  | 4.248056000  | -1.229514000 | -0.646797000 |
| H  | 5.716187000  | -3.156756000 | -0.022103000 |
| C  | 6.271006000  | -0.489261000 | -0.799248000 |
| H  | 5.973141000  | 0.460190000  | -1.249946000 |
| H  | 7.145582000  | -0.327559000 | -0.163953000 |
| Cl | 6.791098000  | -1.560734000 | -2.150094000 |
| H  | 4.571377000  | -2.706723000 | 1.259831000  |
| H  | 6.289519000  | -2.244988000 | 1.392201000  |

|   |             |              |              |
|---|-------------|--------------|--------------|
| C | 3.079119000 | 0.866561000  | -0.424375000 |
| C | 3.752034000 | 0.710205000  | 0.898992000  |
| C | 2.036984000 | 0.145230000  | -0.852337000 |
| C | 1.469536000 | -0.978274000 | -0.035873000 |
| O | 0.211517000 | -1.189152000 | -0.156189000 |
| O | 2.246870000 | -1.604659000 | 0.708226000  |
| O | 3.456774000 | 1.398151000  | 1.854041000  |
| H | 3.405259000 | 1.745157000  | -0.983070000 |
| H | 1.516808000 | 0.426216000  | -1.764107000 |

75

B\_TS5 E = -3185.9550574 Imaginary Frequency= 137.0481

|    |              |              |              |
|----|--------------|--------------|--------------|
| C  | -0.337405000 | -1.749971000 | 2.466857000  |
| C  | 0.815461000  | -0.749057000 | 2.403844000  |
| N  | 0.549770000  | 0.177040000  | 1.317103000  |
| C  | 0.835360000  | 1.436925000  | 1.436486000  |
| C  | 0.683520000  | 2.390648000  | 0.387371000  |
| C  | 0.356248000  | 1.983556000  | -0.945849000 |
| C  | 0.229131000  | 2.990823000  | -1.928951000 |
| C  | 0.418640000  | 4.320663000  | -1.608515000 |
| C  | 0.763801000  | 4.720223000  | -0.303848000 |
| C  | 0.893538000  | 3.755886000  | 0.674361000  |
| N  | -0.857995000 | -1.963844000 | 1.119639000  |
| C  | -1.788027000 | -2.853264000 | 0.948727000  |
| C  | -2.468485000 | -3.108644000 | -0.277080000 |
| C  | -2.071272000 | -2.467334000 | -1.497158000 |
| C  | -2.825681000 | -2.754918000 | -2.663212000 |
| C  | -3.902202000 | -3.617020000 | -2.617698000 |
| C  | -4.287872000 | -4.251668000 | -1.419811000 |
| C  | -3.567211000 | -3.995400000 | -0.271768000 |
| O  | -1.056706000 | -1.674473000 | -1.570309000 |
| Al | -0.179506000 | -0.723025000 | -0.309368000 |
| O  | 0.226710000  | 0.735995000  | -1.288158000 |
| H  | -2.119885000 | -3.443490000 | 1.816819000  |
| H  | 1.217435000  | 1.805266000  | 2.396624000  |
| H  | -3.845690000 | -4.464439000 | 0.671998000  |
| H  | -5.139556000 | -4.924511000 | -1.401338000 |
| H  | -4.471425000 | -3.802649000 | -3.526267000 |
| H  | 0.286271000  | 5.075584000  | -2.380455000 |
| H  | 0.910938000  | 5.770171000  | -0.070142000 |
| H  | -2.538609000 | -2.241775000 | -3.575123000 |
| H  | -0.068331000 | 2.675500000  | -2.923613000 |
| H  | 1.157407000  | 4.031395000  | 1.694973000  |
| H  | -0.009251000 | -2.694671000 | 2.917156000  |
| H  | -1.145934000 | -1.350559000 | 3.099340000  |



|    |              |              |              |
|----|--------------|--------------|--------------|
| H  | 0.945592000  | -0.226477000 | 3.360648000  |
| H  | 1.754366000  | -1.275382000 | 2.184342000  |
| C  | 6.229493000  | -0.687060000 | 0.246062000  |
| C  | 6.794810000  | -1.956724000 | 0.829530000  |
| O  | 5.587855000  | 0.023683000  | 1.332848000  |
| H  | 5.485287000  | -0.924526000 | -0.519160000 |
| H  | 7.318761000  | -2.527691000 | 0.059102000  |
| C  | 7.265719000  | 0.278824000  | -0.301520000 |
| H  | 6.791420000  | 1.194222000  | -0.662723000 |
| H  | 8.005926000  | 0.534629000  | 0.460829000  |
| Cl | 8.159739000  | -0.424467000 | -1.694861000 |
| H  | 5.976550000  | -2.562587000 | 1.221476000  |
| H  | 7.497617000  | -1.733562000 | 1.638862000  |
| C  | 3.852535000  | 0.821298000  | -0.220008000 |
| C  | 4.375148000  | 0.602090000  | 1.161794000  |
| C  | 3.023606000  | -0.011655000 | -0.858487000 |
| C  | 2.620293000  | -1.315747000 | -0.243592000 |
| O  | 1.408892000  | -1.708788000 | -0.463372000 |
| O  | 3.445942000  | -1.923796000 | 0.451044000  |
| O  | 3.797491000  | 1.029112000  | 2.139930000  |
| H  | 4.076861000  | 1.803469000  | -0.636893000 |
| H  | 2.562938000  | 0.282105000  | -1.797125000 |
| C  | -3.127329000 | 0.744383000  | 1.275674000  |
| C  | -2.299043000 | 1.454308000  | 2.327461000  |
| O  | -2.386035000 | 0.425750000  | 0.101819000  |
| H  | -3.937854000 | 1.426259000  | 1.001367000  |
| H  | -2.945357000 | 1.796603000  | 3.141711000  |
| C  | -3.793797000 | -0.522519000 | 1.797188000  |
| H  | -4.284032000 | -1.064401000 | 0.985094000  |
| H  | -3.093704000 | -1.186842000 | 2.308063000  |
| Cl | -5.080640000 | -0.150227000 | 3.021806000  |
| H  | -1.808927000 | 2.324261000  | 1.882757000  |
| H  | -1.532494000 | 0.803013000  | 2.759147000  |
| C  | -4.525924000 | 0.398478000  | -1.264857000 |
| C  | -3.110112000 | 0.900870000  | -1.287936000 |
| C  | -5.403848000 | 1.392993000  | -1.125299000 |
| C  | -4.679900000 | 2.680308000  | -0.934172000 |
| O  | -5.206388000 | 3.775723000  | -0.787142000 |
| O  | -3.369940000 | 2.462829000  | -0.938313000 |
| O  | -2.385782000 | 0.716281000  | -2.253664000 |
| H  | -4.724804000 | -0.654513000 | -1.450753000 |
| H  | -6.486521000 | 1.346059000  | -1.161215000 |

75

B\_INT11 E = -3185.997154

|    |              |              |              |
|----|--------------|--------------|--------------|
| C  | 0.370668000  | -1.063080000 | -2.129010000 |
| C  | 0.068253000  | 0.409014000  | -1.856852000 |
| N  | -0.253170000 | 0.556162000  | -0.435680000 |
| C  | -0.602441000 | 1.734156000  | -0.021996000 |
| C  | -0.894867000 | 2.054831000  | 1.345826000  |
| C  | -0.879095000 | 1.077064000  | 2.390384000  |
| C  | -1.248800000 | 1.504830000  | 3.687481000  |
| C  | -1.595432000 | 2.820901000  | 3.941188000  |
| C  | -1.596093000 | 3.781135000  | 2.917601000  |
| C  | -1.249475000 | 3.385180000  | 1.638045000  |
| N  | 1.011447000  | -1.627600000 | -0.955716000 |
| C  | 2.030798000  | -2.408009000 | -1.042898000 |
| C  | 2.640061000  | -3.057711000 | 0.082313000  |
| C  | 2.031819000  | -3.036224000 | 1.383496000  |
| C  | 2.674558000  | -3.780078000 | 2.404971000  |
| C  | 3.847005000  | -4.472680000 | 2.168946000  |
| C  | 4.443287000  | -4.484225000 | 0.896664000  |
| C  | 3.826054000  | -3.788865000 | -0.125852000 |
| O  | 0.929122000  | -2.406804000 | 1.655817000  |
| Al | 0.150274000  | -1.017077000 | 0.749603000  |
| O  | -0.586269000 | -0.179906000 | 2.199083000  |
| H  | 2.470054000  | -2.610352000 | -2.033075000 |
| H  | -0.685863000 | 2.547957000  | -0.744531000 |
| H  | 4.253729000  | -3.794800000 | -1.128905000 |
| H  | 5.362769000  | -5.033324000 | 0.719151000  |
| H  | 4.314280000  | -5.019560000 | 2.985510000  |
| H  | -1.869075000 | 3.112264000  | 4.953664000  |
| H  | -1.864327000 | 4.812554000  | 3.125303000  |
| H  | 2.211509000  | -3.772177000 | 3.387129000  |
| H  | -1.244874000 | 0.759145000  | 4.477616000  |
| H  | -1.244675000 | 4.100653000  | 0.817238000  |
| H  | -0.572104000 | -1.610025000 | -2.269171000 |
| H  | 0.990119000  | -1.188152000 | -3.027737000 |
| H  | 0.932780000  | 1.048288000  | -2.076576000 |
| H  | -0.770911000 | 0.749629000  | -2.475393000 |
| C  | -5.864214000 | -0.592455000 | -1.379237000 |
| C  | -6.096435000 | -1.405463000 | -2.627107000 |
| O  | -5.091715000 | 0.565892000  | -1.771765000 |
| H  | -5.297129000 | -1.178185000 | -0.651034000 |
| H  | -6.705434000 | -2.284018000 | -2.399940000 |
| C  | -7.123663000 | -0.031860000 | -0.741508000 |
| H  | -6.877541000 | 0.588247000  | 0.123575000  |
| H  | -7.697295000 | 0.561833000  | -1.457682000 |
| Cl | -8.207768000 | -1.339564000 | -0.146664000 |

|    |              |              |              |
|----|--------------|--------------|--------------|
| H  | -5.133515000 | -1.735505000 | -3.019811000 |
| H  | -6.610096000 | -0.810143000 | -3.388941000 |
| C  | -3.923910000 | 0.522436000  | 0.398916000  |
| C  | -4.067591000 | 1.013689000  | -1.003775000 |
| C  | -3.195236000 | -0.532560000 | 0.779285000  |
| C  | -2.489648000 | -1.402333000 | -0.212616000 |
| O  | -1.387030000 | -1.942405000 | 0.195321000  |
| O  | -2.976209000 | -1.545638000 | -1.341970000 |
| O  | -3.361621000 | 1.896561000  | -1.440321000 |
| H  | -4.338992000 | 1.196966000  | 1.148890000  |
| H  | -3.019863000 | -0.722819000 | 1.834640000  |
| C  | 4.206677000  | 1.036759000  | -1.250130000 |
| C  | 3.864099000  | 1.267529000  | -2.698044000 |
| O  | 3.002528000  | 0.529501000  | -0.603092000 |
| H  | 4.538697000  | 1.965292000  | -0.777183000 |
| H  | 4.750547000  | 1.605789000  | -3.238804000 |
| C  | 5.216202000  | -0.075258000 | -1.005576000 |
| H  | 5.361426000  | -0.247184000 | 0.063748000  |
| H  | 4.887502000  | -1.008661000 | -1.471060000 |
| Cl | 6.823645000  | 0.329503000  | -1.697013000 |
| H  | 3.096996000  | 2.042079000  | -2.775422000 |
| H  | 3.503218000  | 0.337952000  | -3.155772000 |
| C  | 3.056453000  | 2.090796000  | 1.294899000  |
| C  | 2.639789000  | 0.854457000  | 0.642448000  |
| C  | 3.005567000  | 3.310571000  | 0.717591000  |
| C  | 2.739826000  | 3.612221000  | -0.737278000 |
| O  | 3.702900000  | 4.199027000  | -1.287501000 |
| O  | 1.648049000  | 3.224972000  | -1.220245000 |
| O  | 1.889250000  | 0.064214000  | 1.229526000  |
| H  | 3.176177000  | 1.991669000  | 2.370791000  |
| H  | 3.193153000  | 4.175812000  | 1.353367000  |

75

B\_INT12' E = -3186.0137184

|   |              |              |              |
|---|--------------|--------------|--------------|
| C | -0.918102000 | 1.746169000  | 2.853667000  |
| C | -1.028187000 | 0.222553000  | 2.814110000  |
| N | -0.252234000 | -0.270065000 | 1.680075000  |
| C | -0.090269000 | -1.543473000 | 1.537786000  |
| C | 0.579872000  | -2.163626000 | 0.430131000  |
| C | 1.259010000  | -1.414999000 | -0.589849000 |
| C | 1.909472000  | -2.156948000 | -1.606464000 |
| C | 1.869581000  | -3.538582000 | -1.634665000 |
| C | 1.186864000  | -4.266905000 | -0.647109000 |
| C | 0.561931000  | -3.571236000 | 0.371294000  |
| N | -0.853149000 | 2.243390000  | 1.495123000  |

|    |              |              |              |
|----|--------------|--------------|--------------|
| C  | -1.532558000 | 3.267350000  | 1.110977000  |
| C  | -1.418166000 | 3.869290000  | -0.186704000 |
| C  | -0.394401000 | 3.481730000  | -1.118857000 |
| C  | -0.312548000 | 4.223527000  | -2.324982000 |
| C  | -1.192901000 | 5.250204000  | -2.608093000 |
| C  | -2.200790000 | 5.616237000  | -1.700254000 |
| C  | -2.289770000 | 4.929014000  | -0.504355000 |
| O  | 0.462394000  | 2.532712000  | -0.897424000 |
| Al | 0.283831000  | 1.118996000  | 0.290249000  |
| O  | 1.328945000  | -0.117654000 | -0.609756000 |
| H  | -2.233636000 | 3.741329000  | 1.815117000  |
| H  | -0.506978000 | -2.225742000 | 2.289889000  |
| H  | -3.049980000 | 5.199938000  | 0.228294000  |
| H  | -2.888095000 | 6.424781000  | -1.929850000 |
| H  | -1.101075000 | 5.783360000  | -3.552528000 |
| H  | 2.386553000  | -4.065902000 | -2.433846000 |
| H  | 1.158348000  | -5.351900000 | -0.678022000 |
| H  | 0.465990000  | 3.939518000  | -3.027011000 |
| H  | 2.446413000  | -1.596167000 | -2.366720000 |
| H  | 0.020466000  | -4.103000000 | 1.153228000  |
| H  | -1.755169000 | 2.190311000  | 3.410134000  |
| H  | 0.022241000  | 2.033630000  | 3.340585000  |
| H  | -0.673235000 | -0.215540000 | 3.755361000  |
| H  | -2.074070000 | -0.069897000 | 2.664291000  |
| C  | -5.722748000 | -1.218455000 | 0.227266000  |
| C  | -6.359847000 | -0.085854000 | 0.991187000  |
| O  | -4.963975000 | -1.998000000 | 1.180784000  |
| H  | -5.048784000 | -0.822724000 | -0.537220000 |
| H  | -6.972504000 | 0.525487000  | 0.323934000  |
| C  | -6.701677000 | -2.202317000 | -0.389680000 |
| H  | -6.170130000 | -3.017847000 | -0.885363000 |
| H  | -7.370917000 | -2.618019000 | 0.367840000  |
| Cl | -7.734538000 | -1.422722000 | -1.639662000 |
| H  | -5.572821000 | 0.537798000  | 1.417862000  |
| H  | -6.994446000 | -0.468773000 | 1.797075000  |
| C  | -3.214137000 | -2.396022000 | -0.516810000 |
| C  | -3.703060000 | -2.405444000 | 0.894818000  |
| C  | -2.550437000 | -1.387493000 | -1.093255000 |
| C  | -2.305054000 | -0.105368000 | -0.360265000 |
| O  | -1.256685000 | 0.524772000  | -0.741391000 |
| O  | -3.083286000 | 0.206516000  | 0.559598000  |
| O  | -3.044378000 | -2.905112000 | 1.783098000  |
| H  | -3.284897000 | -3.364226000 | -1.012068000 |
| H  | -2.075790000 | -1.521677000 | -2.063115000 |

|                          |              |              |                |
|--------------------------|--------------|--------------|----------------|
| C                        | 5.245498000  | -1.111578000 | -0.038989000   |
| C                        | 4.723681000  | -2.082981000 | 0.989619000    |
| O                        | 6.107314000  | -0.154350000 | 0.619823000    |
| H                        | 4.410587000  | -0.598101000 | -0.530376000   |
| H                        | 4.073107000  | -2.822659000 | 0.512929000    |
| C                        | 6.175664000  | -1.717868000 | -1.080091000   |
| H                        | 6.518235000  | -0.953428000 | -1.780963000   |
| H                        | 7.044070000  | -2.167522000 | -0.592650000   |
| Cl                       | 5.399181000  | -3.010051000 | -2.061754000   |
| H                        | 4.149108000  | -1.534954000 | 1.739413000    |
| H                        | 5.550360000  | -2.604642000 | 1.483719000    |
| C                        | 4.846220000  | 1.715531000  | -0.379389000   |
| C                        | 5.911629000  | 1.187155000  | 0.520755000    |
| C                        | 3.550983000  | 1.854013000  | -0.078029000   |
| C                        | 2.991319000  | 1.394029000  | 1.233380000    |
| O                        | 1.723929000  | 1.592172000  | 1.410020000    |
| O                        | 3.754803000  | 0.894535000  | 2.066812000    |
| O                        | 6.711035000  | 1.924388000  | 1.055969000    |
| H                        | 5.227570000  | 2.097742000  | -1.325986000   |
| H                        | 2.865231000  | 2.319994000  | -0.78267000065 |
| B_INT13 E = -2346.402316 |              |              |                |
| C                        | 1.137939000  | 0.796058000  | 2.716435000    |
| C                        | 0.403951000  | -0.528169000 | 2.523618000    |
| N                        | 0.860800000  | -1.127582000 | 1.268979000    |
| C                        | 0.410943000  | -2.302785000 | 0.945924000    |
| C                        | 0.688987000  | -2.969172000 | -0.289763000   |
| C                        | 1.602546000  | -2.441954000 | -1.259479000   |
| C                        | 1.830469000  | -3.206349000 | -2.424934000   |
| C                        | 1.169078000  | -4.402894000 | -2.636761000   |
| C                        | 0.256514000  | -4.909087000 | -1.696157000   |
| C                        | 0.032560000  | -4.194422000 | -0.536902000   |
| N                        | 1.391796000  | 1.394382000  | 1.418396000    |
| C                        | 1.344085000  | 2.677057000  | 1.254450000    |
| C                        | 1.740342000  | 3.350865000  | 0.056869000    |
| C                        | 2.415346000  | 2.664778000  | -1.006701000   |
| C                        | 2.878634000  | 3.443580000  | -2.090866000   |
| C                        | 2.657775000  | 4.807391000  | -2.141919000   |
| C                        | 1.982933000  | 5.476945000  | -1.107324000   |
| C                        | 1.545455000  | 4.746207000  | -0.021777000   |
| O                        | 2.648675000  | 1.378886000  | -0.996515000   |
| Al                       | 1.713070000  | 0.116151000  | -0.070339000   |
| O                        | 2.248021000  | -1.316064000 | -1.090791000   |
| H                        | 1.008492000  | 3.307360000  | 2.089861000    |
| H                        | -0.250675000 | -2.829876000 | 1.642620000    |

|    |              |              |              |
|----|--------------|--------------|--------------|
| H  | 1.035297000  | 5.240034000  | 0.804003000  |
| H  | 1.817149000  | 6.547937000  | -1.158361000 |
| H  | 3.014764000  | 5.370300000  | -3.001092000 |
| H  | 1.357536000  | -4.957138000 | -3.553251000 |
| H  | -0.262518000 | -5.844182000 | -1.879206000 |
| H  | 3.398317000  | 2.926284000  | -2.891329000 |
| H  | 2.527493000  | -2.809578000 | -3.156682000 |
| H  | -0.676458000 | -4.551367000 | 0.208040000  |
| H  | 0.573886000  | 1.471560000  | 3.371413000  |
| H  | 2.115814000  | 0.614674000  | 3.186042000  |
| H  | 0.586949000  | -1.200850000 | 3.370984000  |
| H  | -0.674403000 | -0.353301000 | 2.450173000  |
| C  | -4.610850000 | 0.547238000  | 0.570167000  |
| C  | -4.673182000 | 1.613668000  | 1.633195000  |
| O  | -4.117222000 | -0.655802000 | 1.215462000  |
| H  | -3.913463000 | 0.840893000  | -0.219860000 |
| H  | -5.066379000 | 2.542376000  | 1.213295000  |
| C  | -5.955360000 | 0.172082000  | -0.028680000 |
| H  | -5.851435000 | -0.657911000 | -0.731514000 |
| H  | -6.669190000 | -0.107790000 | 0.749991000  |
| Cl | -6.664016000 | 1.542846000  | -0.942723000 |
| H  | -3.669753000 | 1.799712000  | 2.019392000  |
| H  | -5.320932000 | 1.302113000  | 2.458224000  |
| C  | -2.982834000 | -1.299741000 | -0.874829000 |
| C  | -3.220164000 | -1.446201000 | 0.594900000  |
| C  | -1.991415000 | -0.579993000 | -1.411329000 |
| C  | -1.087635000 | 0.224844000  | -0.541111000 |
| O  | 0.115285000  | 0.348017000  | -1.000820000 |
| O  | -1.509321000 | 0.657445000  | 0.540061000  |
| O  | -2.696532000 | -2.345953000 | 1.221094000  |
| H  | -3.588412000 | -1.956908000 | -1.497541000 |
| H  | -1.763328000 | -0.646572000 | -2.472066000 |
| C  | 4.102140000  | -1.527928000 | 1.218519000  |
| C  | 4.589132000  | -1.800174000 | 2.603429000  |
| O  | 3.521667000  | -0.212787000 | 1.028530000  |
| H  | 3.507982000  | -2.306609000 | 0.740806000  |
| H  | 5.246924000  | -2.673643000 | 2.612096000  |
| C  | 4.731850000  | -0.560423000 | 0.325111000  |
| H  | 4.596856000  | -0.658187000 | -0.748889000 |
| H  | 5.597750000  | 0.003543000  | 0.666341000  |
| H  | 3.749853000  | -2.011784000 | 3.273494000  |
| H  | 5.142038000  | -0.945494000 | 3.001416000  |

85

B\_TS6 E = -3379.0972146 Imaginary Frequency= 439.7317

|    |              |              |              |
|----|--------------|--------------|--------------|
| C  | -0.983069000 | 1.290564000  | 2.729118000  |
| C  | -0.689549000 | -0.153381000 | 2.324815000  |
| N  | -0.119663000 | -0.152992000 | 0.978764000  |
| C  | 0.251452000  | -1.285022000 | 0.470820000  |
| C  | 0.743026000  | -1.456446000 | -0.866516000 |
| C  | 0.945529000  | -0.358431000 | -1.766556000 |
| C  | 1.404764000  | -0.665295000 | -3.070859000 |
| C  | 1.650651000  | -1.968715000 | -3.461543000 |
| C  | 1.461885000  | -3.042442000 | -2.574438000 |
| C  | 1.012565000  | -2.772923000 | -1.295602000 |
| N  | -1.359686000 | 2.046767000  | 1.551904000  |
| C  | -2.307092000 | 2.920524000  | 1.584440000  |
| C  | -2.632796000 | 3.795396000  | 0.496848000  |
| C  | -1.799168000 | 3.900646000  | -0.669626000 |
| C  | -2.156970000 | 4.882869000  | -1.627533000 |
| C  | -3.273600000 | 5.680102000  | -1.465519000 |
| C  | -4.094464000 | 5.564195000  | -0.330583000 |
| C  | -3.756004000 | 4.635518000  | 0.634146000  |
| O  | -0.736823000 | 3.180321000  | -0.864588000 |
| Al | -0.336307000 | 1.555997000  | -0.097343000 |
| O  | 0.753642000  | 0.885346000  | -1.433787000 |
| H  | -2.898022000 | 3.035939000  | 2.505702000  |
| H  | 0.164257000  | -2.196502000 | 1.072304000  |
| H  | -4.361783000 | 4.533867000  | 1.534426000  |
| H  | -4.968773000 | 6.196635000  | -0.211572000 |
| H  | -3.518871000 | 6.411754000  | -2.232821000 |
| H  | 2.005059000  | -2.162054000 | -4.471938000 |
| H  | 1.662669000  | -4.061849000 | -2.888842000 |
| H  | -1.521369000 | 4.973097000  | -2.503282000 |
| H  | 1.559174000  | 0.166384000  | -3.752524000 |
| H  | 0.838154000  | -3.582478000 | -0.587110000 |
| H  | -1.758025000 | 1.335152000  | 3.506164000  |
| H  | -0.071021000 | 1.756436000  | 3.127715000  |
| H  | 0.001382000  | -0.622798000 | 3.037680000  |
| H  | -1.618684000 | -0.733992000 | 2.307100000  |
| C  | -5.463869000 | -2.253092000 | 0.472837000  |
| C  | -6.046846000 | -1.517140000 | 1.652283000  |
| O  | -4.320613000 | -2.994832000 | 0.959637000  |
| H  | -5.137094000 | -1.540678000 | -0.289781000 |
| H  | -6.935226000 | -0.957340000 | 1.349562000  |
| C  | -6.378330000 | -3.298826000 | -0.141148000 |
| H  | -5.873331000 | -3.827220000 | -0.952962000 |
| H  | -6.706341000 | -4.023149000 | 0.608575000  |
| Cl | -7.857173000 | -2.557081000 | -0.846730000 |

|    |              |              |              |
|----|--------------|--------------|--------------|
| H  | -5.302314000 | -0.817495000 | 2.035215000  |
| H  | -6.327064000 | -2.216361000 | 2.446681000  |
| C  | -3.109550000 | -2.528295000 | -1.140196000 |
| C  | -3.145200000 | -2.973017000 | 0.286439000  |
| C  | -2.838655000 | -1.282008000 | -1.543508000 |
| C  | -2.627881000 | -0.186403000 | -0.547906000 |
| O  | -1.862113000 | 0.757962000  | -0.959445000 |
| O  | -3.149160000 | -0.297791000 | 0.575358000  |
| O  | -2.164029000 | -3.447785000 | 0.818851000  |
| H  | -3.157890000 | -3.344695000 | -1.860230000 |
| H  | -2.659803000 | -1.064405000 | -2.594195000 |
| C  | 2.451477000  | 1.642242000  | 0.894618000  |
| C  | 3.140926000  | 1.674618000  | 2.227350000  |
| O  | 1.184955000  | 2.302135000  | 0.850511000  |
| H  | 2.427223000  | 0.639079000  | 0.445285000  |
| H  | 4.202678000  | 1.435507000  | 2.099582000  |
| C  | 2.649045000  | 2.731076000  | -0.038618000 |
| H  | 2.366668000  | 2.609550000  | -1.074242000 |
| H  | 2.878497000  | 3.713629000  | 0.345418000  |
| H  | 2.700399000  | 0.945365000  | 2.915839000  |
| H  | 3.069213000  | 2.673026000  | 2.669167000  |
| C  | 5.002550000  | -1.450756000 | 1.138516000  |
| C  | 5.815650000  | -1.165739000 | 2.376136000  |
| O  | 5.914726000  | -1.936763000 | 0.134494000  |
| H  | 4.519122000  | -0.533766000 | 0.792265000  |
| H  | 5.170443000  | -0.820956000 | 3.188917000  |
| C  | 3.962798000  | -2.548268000 | 1.280298000  |
| H  | 3.407779000  | -2.679602000 | 0.346182000  |
| H  | 4.422233000  | -3.495967000 | 1.571365000  |
| Cl | 2.742129000  | -2.150129000 | 2.550794000  |
| H  | 6.540481000  | -0.383820000 | 2.140715000  |
| H  | 6.346815000  | -2.064055000 | 2.707665000  |
| C  | 4.665656000  | -0.752080000 | -1.641616000 |
| C  | 5.868253000  | -1.479487000 | -1.148557000 |
| C  | 4.381055000  | 0.545916000  | -1.481536000 |
| C  | 5.203891000  | 1.472900000  | -0.621123000 |
| O  | 4.763994000  | 2.663598000  | -0.482574000 |
| O  | 6.231079000  | 0.988171000  | -0.098641000 |
| O  | 6.737444000  | -1.842547000 | -1.910814000 |
| H  | 4.037639000  | -1.365428000 | -2.289379000 |
| H  | 3.505313000  | 0.952054000  | -1.989046000 |

85

B\_INT14 E = -3379.1404365

|   |              |             |             |
|---|--------------|-------------|-------------|
| C | -0.869668000 | 1.406931000 | 2.751958000 |
|---|--------------|-------------|-------------|



|    |              |              |              |
|----|--------------|--------------|--------------|
| C  | -0.490542000 | -0.027001000 | 2.375970000  |
| N  | 0.009636000  | -0.046204000 | 1.004675000  |
| C  | 0.359751000  | -1.178181000 | 0.492699000  |
| C  | 0.733664000  | -1.363059000 | -0.885668000 |
| C  | 0.878419000  | -0.270484000 | -1.805754000 |
| C  | 1.182977000  | -0.598817000 | -3.151950000 |
| C  | 1.341885000  | -1.910916000 | -3.563249000 |
| C  | 1.219098000  | -2.974854000 | -2.654299000 |
| C  | 0.917007000  | -2.685789000 | -1.334511000 |
| N  | -1.322032000 | 2.107172000  | 1.569717000  |
| C  | -2.347337000 | 2.885029000  | 1.588721000  |
| C  | -2.755995000 | 3.701334000  | 0.481604000  |
| C  | -1.936122000 | 3.860840000  | -0.690741000 |
| C  | -2.394583000 | 4.782926000  | -1.668717000 |
| C  | -3.583600000 | 5.470334000  | -1.521310000 |
| C  | -4.386853000 | 5.300243000  | -0.380501000 |
| C  | -3.955108000 | 4.430201000  | 0.602832000  |
| O  | -0.810107000 | 3.249352000  | -0.875589000 |
| Al | -0.220131000 | 1.696437000  | -0.054074000 |
| O  | 0.793449000  | 0.978113000  | -1.457406000 |
| H  | -2.947424000 | 2.963621000  | 2.508936000  |
| H  | 0.324927000  | -2.087287000 | 1.107007000  |
| H  | -4.546656000 | 4.289365000  | 1.507723000  |
| H  | -5.319774000 | 5.845051000  | -0.271406000 |
| H  | -3.901739000 | 6.155874000  | -2.304840000 |
| H  | 1.572224000  | -2.117501000 | -4.606631000 |
| H  | 1.347525000  | -4.001988000 | -2.981760000 |
| H  | -1.772982000 | 4.914391000  | -2.549653000 |
| H  | 1.282524000  | 0.226636000  | -3.851959000 |
| H  | 0.777162000  | -3.489205000 | -0.611469000 |
| H  | -1.629308000 | 1.415949000  | 3.546540000  |
| H  | 0.019851000  | 1.941814000  | 3.110013000  |
| H  | 0.265116000  | -0.420768000 | 3.069262000  |
| H  | -1.374737000 | -0.672820000 | 2.422415000  |
| C  | -5.213285000 | -2.359622000 | 0.536684000  |
| C  | -5.754308000 | -1.666718000 | 1.761325000  |
| O  | -4.049063000 | -3.110079000 | 0.952741000  |
| H  | -4.921640000 | -1.620153000 | -0.213999000 |
| H  | -6.657530000 | -1.104010000 | 1.512308000  |
| C  | -6.142287000 | -3.394215000 | -0.074448000 |
| H  | -5.666814000 | -3.886528000 | -0.925816000 |
| H  | -6.429057000 | -4.148751000 | 0.662379000  |
| Cl | -7.661162000 | -2.650148000 | -0.689256000 |
| H  | -4.998283000 | -0.974240000 | 2.134707000  |

|                        |               |              |              |
|------------------------|---------------|--------------|--------------|
| H                      | -5.998133000  | -2.393422000 | 2.543232000  |
| C                      | -2.901310000  | -2.538093000 | -1.158172000 |
| C                      | -2.892329000  | -3.042308000 | 0.248068000  |
| C                      | -2.679019000  | -1.269394000 | -1.519651000 |
| C                      | -2.475135000  | -0.197983000 | -0.492574000 |
| O                      | -1.771279000  | 0.789089000  | -0.897918000 |
| O                      | -2.947929000  | -0.381668000 | 0.646108000  |
| O                      | -1.895060000  | -3.535907000 | 0.732628000  |
| H                      | -2.934988000  | -3.328710000 | -1.907684000 |
| H                      | -2.532973000  | -1.010738000 | -2.566607000 |
| C                      | 2.497750000   | 1.973233000  | 0.765031000  |
| C                      | 3.175532000   | 2.048002000  | 2.128217000  |
| O                      | 1.204635000   | 2.434843000  | 0.826348000  |
| H                      | 2.544269000   | 0.908652000  | 0.427836000  |
| H                      | 4.226834000   | 1.736196000  | 2.089419000  |
| C                      | 3.236291000   | 2.806629000  | -0.283435000 |
| H                      | 2.746283000   | 2.702885000  | -1.257847000 |
| H                      | 3.214460000   | 3.860755000  | 0.004034000  |
| H                      | 2.649462000   | 1.398057000  | 2.835818000  |
| H                      | 3.134594000   | 3.074359000  | 2.510948000  |
| C                      | 4.890141000   | -1.394253000 | 1.175017000  |
| C                      | 5.820318000   | -1.135804000 | 2.333443000  |
| O                      | 5.701706000   | -1.961855000 | 0.118810000  |
| H                      | 4.428400000   | -0.457645000 | 0.848584000  |
| H                      | 5.270023000   | -0.707846000 | 3.174392000  |
| C                      | 3.796511000   | -2.415969000 | 1.437510000  |
| H                      | 3.134628000   | -2.508495000 | 0.569289000  |
| H                      | 4.225322000   | -3.392328000 | 1.675742000  |
| Cl                     | 2.765918000   | -1.934009000 | 2.829232000  |
| H                      | 6.594270000   | -0.431262000 | 2.022480000  |
| H                      | 6.297548000   | -2.064582000 | 2.661462000  |
| C                      | 4.311916000   | -0.903026000 | -1.630949000 |
| C                      | 5.494544000   | -1.692179000 | -1.191965000 |
| C                      | 4.110116000   | 0.415239000  | -1.499203000 |
| C                      | 5.064739000   | 1.278638000  | -0.767672000 |
| O                      | 4.654014000   | 2.494190000  | -0.369932000 |
| O                      | 6.207889000   | 0.923370000  | -0.525117000 |
| O                      | 6.226801000   | -2.201294000 | -2.011775000 |
| H                      | 3.591860000   | -1.489432000 | -2.202483000 |
| H                      | 3.212879000   | 0.853616000  | -1.926777000 |
| 94                     |               |              |              |
| B_INT4 (Full mode) E = | -2402.9622361 |              |              |
| C                      | 0.705399000   | 4.008742000  | 0.177560000  |
| C                      | -0.580993000  | 4.030595000  | -0.639389000 |

|    |              |              |              |
|----|--------------|--------------|--------------|
| N  | -1.203010000 | 2.724027000  | -0.494022000 |
| C  | -2.496984000 | 2.612531000  | -0.553226000 |
| C  | -3.218349000 | 1.384173000  | -0.530844000 |
| C  | -2.543008000 | 0.125784000  | -0.623816000 |
| C  | -3.331947000 | -1.048989000 | -0.799208000 |
| C  | -4.717088000 | -0.912693000 | -0.757304000 |
| C  | -5.403444000 | 0.309141000  | -0.604401000 |
| C  | -4.626100000 | 1.447672000  | -0.523236000 |
| N  | 1.307270000  | 2.701931000  | -0.026145000 |
| C  | 2.589102000  | 2.585149000  | -0.188261000 |
| C  | 3.286722000  | 1.351229000  | -0.342257000 |
| C  | 2.599713000  | 0.097874000  | -0.322128000 |
| C  | 3.369104000  | -1.093754000 | -0.460094000 |
| C  | 4.747089000  | -0.963531000 | -0.618953000 |
| C  | 5.443358000  | 0.260475000  | -0.651535000 |
| C  | 4.684154000  | 1.405810000  | -0.508380000 |
| O  | 1.296422000  | 0.038034000  | -0.183535000 |
| Al | -0.038528000 | 1.226366000  | 0.150616000  |
| O  | -1.234644000 | 0.054618000  | -0.589829000 |
| H  | 3.202259000  | 3.497774000  | -0.201625000 |
| H  | -3.098575000 | 3.526591000  | -0.657684000 |
| H  | 5.156129000  | 2.388955000  | -0.517210000 |
| H  | 5.326492000  | -1.873424000 | -0.724109000 |
| H  | -5.312349000 | -1.812859000 | -0.858067000 |
| H  | -5.090090000 | 2.431745000  | -0.448030000 |
| H  | 1.383568000  | 4.825245000  | -0.100981000 |
| H  | 0.462801000  | 4.102769000  | 1.244209000  |
| H  | -1.251014000 | 4.840715000  | -0.325285000 |
| H  | -0.338377000 | 4.190153000  | -1.699343000 |
| C  | -0.087054000 | 0.707905000  | 2.987061000  |
| C  | 1.418361000  | 0.603632000  | 3.172406000  |
| O  | -0.439235000 | 1.434356000  | 1.846619000  |
| H  | -0.514132000 | 1.216552000  | 3.868215000  |
| H  | 1.675220000  | 0.108658000  | 4.113383000  |
| C  | -0.767651000 | -0.646642000 | 2.847968000  |
| H  | -1.847933000 | -0.522359000 | 2.744153000  |
| H  | -0.388568000 | -1.166574000 | 1.963322000  |
| Cl | -0.494874000 | -1.749701000 | 4.251607000  |
| H  | 1.859813000  | 1.605252000  | 3.174629000  |
| H  | 1.872651000  | 0.031618000  | 2.355143000  |
| C  | 6.959309000  | 0.353165000  | -0.829544000 |
| C  | 2.699404000  | -2.470915000 | -0.425253000 |
| C  | 1.658622000  | -2.584301000 | -1.549610000 |
| H  | 0.869432000  | -1.838188000 | -1.448465000 |

|   |              |              |              |
|---|--------------|--------------|--------------|
| H | 2.129391000  | -2.460886000 | -2.531685000 |
| H | 1.192233000  | -3.576497000 | -1.525153000 |
| C | 2.021318000  | -2.685441000 | 0.936275000  |
| H | 2.750515000  | -2.646181000 | 1.753439000  |
| H | 1.260416000  | -1.927613000 | 1.125801000  |
| H | 1.532693000  | -3.666253000 | 0.967830000  |
| C | 3.708575000  | -3.605458000 | -0.618071000 |
| H | 4.222407000  | -3.544027000 | -1.584001000 |
| H | 4.466316000  | -3.627598000 | 0.172935000  |
| H | 3.179614000  | -4.563218000 | -0.589214000 |
| C | 7.275274000  | 1.166245000  | -2.092724000 |
| H | 6.865114000  | 2.179739000  | -2.033529000 |
| H | 8.358638000  | 1.254948000  | -2.232930000 |
| H | 6.855909000  | 0.689486000  | -2.984751000 |
| C | 7.612387000  | -1.021958000 | -0.966857000 |
| H | 7.449879000  | -1.643239000 | -0.079711000 |
| H | 7.236025000  | -1.569188000 | -1.837762000 |
| H | 8.693557000  | -0.906555000 | -1.093334000 |
| C | 7.573463000  | 1.060688000  | 0.386433000  |
| H | 7.172301000  | 2.071858000  | 0.510488000  |
| H | 7.371197000  | 0.507649000  | 1.309410000  |
| H | 8.660197000  | 1.147045000  | 0.273614000  |
| C | -6.928780000 | 0.406843000  | -0.553102000 |
| C | -7.352136000 | 1.031703000  | 0.783605000  |
| H | -6.929369000 | 2.033540000  | 0.911615000  |
| H | -8.443113000 | 1.121533000  | 0.839022000  |
| H | -7.018797000 | 0.420756000  | 1.628718000  |
| C | -7.602453000 | -0.959371000 | -0.680517000 |
| H | -7.366480000 | -1.445895000 | -1.633067000 |
| H | -7.309712000 | -1.637260000 | 0.128281000  |
| H | -8.689691000 | -0.841183000 | -0.632809000 |
| C | -7.425100000 | 1.298049000  | -1.700148000 |
| H | -7.143470000 | 0.882988000  | -2.673481000 |
| H | -8.517042000 | 1.388223000  | -1.672706000 |
| H | -7.008844000 | 2.308668000  | -1.636344000 |
| C | -2.672572000 | -2.403345000 | -1.079590000 |
| C | -1.912513000 | -2.310144000 | -2.413020000 |
| H | -1.158246000 | -1.521006000 | -2.389525000 |
| H | -1.404709000 | -3.258255000 | -2.625722000 |
| H | -2.603097000 | -2.105476000 | -3.238750000 |
| C | -1.700774000 | -2.808639000 | 0.038791000  |
| H | -0.852977000 | -2.125333000 | 0.101805000  |
| H | -2.201540000 | -2.835493000 | 1.013495000  |
| H | -1.308236000 | -3.812976000 | -0.160606000 |

|   |              |              |              |
|---|--------------|--------------|--------------|
| C | -3.705461000 | -3.525188000 | -1.213658000 |
| H | -4.280323000 | -3.670591000 | -0.292181000 |
| H | -4.410455000 | -3.346874000 | -2.033044000 |
| H | -3.187756000 | -4.465305000 | -1.428438000 |

105

B\_TS2 (Full mode) E = -3056.354351 Imaginary Frequency= 408.6085

|    |              |              |              |
|----|--------------|--------------|--------------|
| C  | 0.672516000  | -0.380097000 | -3.965703000 |
| C  | -0.543512000 | -1.279789000 | -3.718736000 |
| N  | -1.209815000 | -0.806738000 | -2.524425000 |
| C  | -2.493888000 | -0.818464000 | -2.408881000 |
| C  | -3.227450000 | -0.447633000 | -1.231733000 |
| C  | -2.592877000 | -0.131748000 | 0.018440000  |
| C  | -3.432319000 | 0.056709000  | 1.162287000  |
| C  | -4.811816000 | 0.013748000  | 0.983062000  |
| C  | -5.452458000 | -0.239668000 | -0.244631000 |
| C  | -4.630705000 | -0.488141000 | -1.327916000 |
| N  | 1.323765000  | -0.181937000 | -2.689930000 |
| C  | 2.596721000  | -0.289968000 | -2.537582000 |
| C  | 3.291042000  | -0.111157000 | -1.290590000 |
| C  | 2.646659000  | 0.372828000  | -0.101736000 |
| C  | 3.460136000  | 0.583220000  | 1.056609000  |
| C  | 4.807180000  | 0.235352000  | 0.993191000  |
| C  | 5.444526000  | -0.281511000 | -0.149248000 |
| C  | 4.662099000  | -0.419214000 | -1.282347000 |
| O  | 1.370837000  | 0.647336000  | -0.065789000 |
| Al | 0.003537000  | 0.061061000  | -1.176916000 |
| O  | -1.296388000 | -0.056820000 | 0.137884000  |
| H  | 3.224972000  | -0.538593000 | -3.408253000 |
| H  | -3.102210000 | -1.160614000 | -3.261301000 |
| H  | 5.098217000  | -0.793915000 | -2.210183000 |
| H  | 5.405128000  | 0.371462000  | 1.887172000  |
| H  | -5.436810000 | 0.173587000  | 1.854074000  |
| H  | -5.060338000 | -0.733145000 | -2.300985000 |
| H  | 1.349239000  | -0.812839000 | -4.716953000 |
| H  | 0.325819000  | 0.600515000  | -4.318035000 |
| H  | -1.215382000 | -1.300797000 | -4.588856000 |
| H  | -0.193864000 | -2.304713000 | -3.528582000 |
| C  | -0.269702000 | 2.964793000  | -1.678616000 |
| C  | 1.195185000  | 3.332182000  | -1.893199000 |
| O  | -0.553005000 | 1.634075000  | -1.924158000 |
| H  | -0.874574000 | 3.595123000  | -2.361377000 |
| H  | 1.360804000  | 4.408531000  | -1.775505000 |
| C  | -0.749085000 | 3.242095000  | -0.261205000 |
| H  | -1.804189000 | 2.981208000  | -0.159272000 |

|    |              |              |              |
|----|--------------|--------------|--------------|
| H  | -0.166736000 | 2.657550000  | 0.454928000  |
| Cl | -0.597800000 | 4.985323000  | 0.252302000  |
| H  | 1.499889000  | 3.042646000  | -2.904788000 |
| H  | 1.839550000  | 2.805090000  | -1.182195000 |
| C  | 0.791597000  | -2.357195000 | 0.503854000  |
| C  | 2.071190000  | -3.112969000 | 0.702574000  |
| O  | 0.585844000  | -1.823211000 | -0.807968000 |
| H  | 0.595768000  | -1.622132000 | 1.290366000  |
| H  | 1.994900000  | -3.706448000 | 1.618654000  |
| C  | -0.382896000 | -3.027734000 | -0.004363000 |
| H  | -1.360307000 | -2.589317000 | 0.136274000  |
| H  | -0.270451000 | -3.900804000 | -0.629576000 |
| Cl | -1.011402000 | -4.716282000 | 1.795951000  |
| H  | 2.925050000  | -2.430067000 | 0.781205000  |
| H  | 2.244638000  | -3.795711000 | -0.135379000 |
| C  | 6.916713000  | -0.691911000 | -0.172209000 |
| C  | 7.611383000  | -0.438534000 | 1.165785000  |
| H  | 8.661711000  | -0.743784000 | 1.102448000  |
| H  | 7.589830000  | 0.621272000  | 1.442318000  |
| H  | 7.149767000  | -1.008524000 | 1.979045000  |
| C  | 7.661788000  | 0.099176000  | -1.256199000 |
| H  | 8.717136000  | -0.198051000 | -1.297194000 |
| H  | 7.230246000  | -0.071746000 | -2.247772000 |
| H  | 7.618165000  | 1.175296000  | -1.057404000 |
| C  | 7.018115000  | -2.190729000 | -0.490424000 |
| H  | 6.488782000  | -2.787728000 | 0.259820000  |
| H  | 6.577106000  | -2.423161000 | -1.465325000 |
| H  | 8.066037000  | -2.515567000 | -0.510284000 |
| C  | 2.858036000  | 1.185383000  | 2.332091000  |
| C  | 2.355817000  | 2.607085000  | 2.036252000  |
| H  | 1.637925000  | 2.613736000  | 1.216000000  |
| H  | 1.861407000  | 3.030332000  | 2.919522000  |
| H  | 3.186722000  | 3.268084000  | 1.763116000  |
| C  | 1.697723000  | 0.328082000  | 2.860938000  |
| H  | 0.861253000  | 0.300271000  | 2.161373000  |
| H  | 2.020640000  | -0.702236000 | 3.052837000  |
| H  | 1.329873000  | 0.743761000  | 3.807138000  |
| C  | 3.889382000  | 1.291123000  | 3.459357000  |
| H  | 4.276727000  | 0.310497000  | 3.759280000  |
| H  | 4.739594000  | 1.927390000  | 3.187460000  |
| H  | 3.413126000  | 1.738947000  | 4.337964000  |
| C  | -6.972914000 | -0.278458000 | -0.401598000 |
| C  | -7.409751000 | 0.777844000  | -1.426413000 |
| H  | -6.945249000 | 0.604421000  | -2.402716000 |

|   |              |              |              |
|---|--------------|--------------|--------------|
| H | -8.498168000 | 0.758564000  | -1.565344000 |
| H | -7.125089000 | 1.783654000  | -1.099852000 |
| C | -7.700131000 | 0.002246000  | 0.913489000  |
| H | -8.783507000 | -0.028787000 | 0.752255000  |
| H | -7.457691000 | -0.741301000 | 1.680157000  |
| H | -7.452091000 | 0.991500000  | 1.313160000  |
| C | -7.405284000 | -1.664181000 | -0.901517000 |
| H | -7.109487000 | -2.446696000 | -0.195355000 |
| H | -8.494521000 | -1.709123000 | -1.026770000 |
| H | -6.949390000 | -1.902986000 | -1.867909000 |
| C | -2.820991000 | 0.252611000  | 2.555439000  |
| C | -3.898089000 | 0.409492000  | 3.633212000  |
| H | -4.531169000 | 1.289175000  | 3.464993000  |
| H | -4.544840000 | -0.472284000 | 3.703030000  |
| H | -3.411866000 | 0.535691000  | 4.606369000  |
| C | -1.943536000 | 1.512780000  | 2.604395000  |
| H | -1.096128000 | 1.433445000  | 1.922761000  |
| H | -2.516005000 | 2.410370000  | 2.340593000  |
| H | -1.550377000 | 1.651856000  | 3.619334000  |
| C | -1.978398000 | -0.978254000 | 2.926771000  |
| H | -2.570460000 | -1.898785000 | 2.913598000  |
| H | -1.144763000 | -1.120515000 | 2.238274000  |
| H | -1.561895000 | -0.857766000 | 3.934578000  |

114

B\_INT10 (Full mode) E = -3435.6904414

|   |              |              |              |
|---|--------------|--------------|--------------|
| C | -0.943180000 | 0.472828000  | -3.685869000 |
| C | 0.461127000  | 0.951433000  | -3.308684000 |
| N | 0.934002000  | 0.118763000  | -2.217883000 |
| C | 2.168874000  | -0.244355000 | -2.138589000 |
| C | 2.745735000  | -0.994661000 | -1.056224000 |
| C | 2.012267000  | -1.361119000 | 0.119759000  |
| C | 2.737754000  | -1.976004000 | 1.195859000  |
| C | 4.092137000  | -2.224829000 | 1.016694000  |
| C | 4.822969000  | -1.894576000 | -0.143407000 |
| C | 4.124001000  | -1.267632000 | -1.156329000 |
| N | -1.669543000 | 0.247355000  | -2.454163000 |
| C | -2.890485000 | 0.618916000  | -2.297663000 |
| C | -3.656402000 | 0.422624000  | -1.095273000 |
| C | -3.168496000 | -0.341447000 | 0.016879000  |
| C | -4.003432000 | -0.440485000 | 1.172745000  |
| C | -5.247385000 | 0.185189000  | 1.153968000  |
| C | -5.751170000 | 0.916219000  | 0.063202000  |
| C | -4.928793000 | 1.014483000  | -1.046921000 |
| O | -2.024203000 | -0.965897000 | -0.017107000 |

|    |              |              |              |
|----|--------------|--------------|--------------|
| Al | -0.517302000 | -0.584543000 | -1.014045000 |
| O  | 0.743371000  | -1.109282000 | 0.257799000  |
| H  | -3.407347000 | 1.136051000  | -3.122171000 |
| H  | 2.865984000  | 0.065112000  | -2.928334000 |
| H  | -5.254135000 | 1.576388000  | -1.924537000 |
| H  | -5.867232000 | 0.104802000  | 2.040292000  |
| H  | 4.639106000  | -2.698470000 | 1.828113000  |
| H  | 4.626480000  | -0.942094000 | -2.065592000 |
| H  | -1.452405000 | 1.195012000  | -4.340222000 |
| H  | -0.869630000 | -0.491854000 | -4.206309000 |
| H  | 1.144967000  | 0.927352000  | -4.168083000 |
| H  | 0.403816000  | 1.986334000  | -2.941555000 |
| C  | -1.069843000 | -3.311948000 | -2.048189000 |
| C  | -2.568969000 | -3.183634000 | -2.302414000 |
| O  | -0.393622000 | -2.108404000 | -2.034812000 |
| H  | -0.651110000 | -3.954985000 | -2.849487000 |
| H  | -3.041833000 | -4.165725000 | -2.411983000 |
| C  | -0.751451000 | -3.979195000 | -0.718412000 |
| H  | 0.328632000  | -4.070989000 | -0.589883000 |
| H  | -1.162153000 | -3.389427000 | 0.103977000  |
| Cl | -1.434623000 | -5.663747000 | -0.532409000 |
| H  | -2.734954000 | -2.613720000 | -3.223061000 |
| H  | -3.062488000 | -2.652546000 | -1.482087000 |
| C  | 2.389923000  | 5.117731000  | 0.134578000  |
| C  | 1.589930000  | 6.241534000  | -0.472721000 |
| O  | 3.038006000  | 4.426143000  | -0.958957000 |
| H  | 1.724197000  | 4.426881000  | 0.658137000  |
| H  | 1.098763000  | 6.824273000  | 0.310554000  |
| C  | 3.524149000  | 5.559143000  | 1.042990000  |
| H  | 4.081341000  | 4.695688000  | 1.413943000  |
| H  | 4.208541000  | 6.231370000  | 0.519114000  |
| Cl | 2.919517000  | 6.443169000  | 2.489910000  |
| H  | 0.827049000  | 5.816260000  | -1.126614000 |
| H  | 2.234608000  | 6.908965000  | -1.054225000 |
| C  | 2.770087000  | 2.278269000  | 0.225724000  |
| C  | 3.082325000  | 3.071246000  | -0.999835000 |
| C  | 1.559923000  | 1.824077000  | 0.569920000  |
| C  | 0.330406000  | 2.132870000  | -0.232461000 |
| O  | -0.587089000 | 1.238882000  | -0.214404000 |
| O  | 0.302428000  | 3.205114000  | -0.864719000 |
| O  | 3.505905000  | 2.544068000  | -2.007913000 |
| H  | 3.655049000  | 1.935915000  | 0.765388000  |
| H  | 1.461548000  | 1.127464000  | 1.398010000  |
| C  | 6.315046000  | -2.210278000 | -0.207857000 |



|   |              |              |              |
|---|--------------|--------------|--------------|
| C | 6.933687000  | -1.778487000 | -1.536744000 |
| H | 6.464176000  | -2.287798000 | -2.385247000 |
| H | 6.837465000  | -0.699422000 | -1.697496000 |
| H | 8.001704000  | -2.023651000 | -1.549939000 |
| C | 7.047978000  | -1.476693000 | 0.924894000  |
| H | 6.665206000  | -1.770010000 | 1.908157000  |
| H | 8.121897000  | -1.701433000 | 0.904057000  |
| H | 6.924550000  | -0.392263000 | 0.831568000  |
| C | 6.532270000  | -3.721167000 | -0.042602000 |
| H | 7.601666000  | -3.965760000 | -0.070952000 |
| H | 6.132893000  | -4.083308000 | 0.910488000  |
| H | 6.033110000  | -4.278277000 | -0.842398000 |
| C | 2.044215000  | -2.286162000 | 2.529506000  |
| C | 1.572034000  | -0.974291000 | 3.176575000  |
| H | 2.414292000  | -0.288357000 | 3.331210000  |
| H | 0.822841000  | -0.478207000 | 2.556042000  |
| H | 1.116560000  | -1.176354000 | 4.154212000  |
| C | 0.832417000  | -3.212316000 | 2.345947000  |
| H | 0.056185000  | -2.736575000 | 1.745835000  |
| H | 1.117393000  | -4.153021000 | 1.860857000  |
| H | 0.402425000  | -3.457748000 | 3.325447000  |
| C | 2.992582000  | -2.968744000 | 3.519928000  |
| H | 3.367515000  | -3.925805000 | 3.138949000  |
| H | 3.854715000  | -2.340250000 | 3.771918000  |
| H | 2.452815000  | -3.173004000 | 4.450941000  |
| C | -7.124671000 | 1.587806000  | 0.068320000  |
| C | -6.960592000 | 3.100611000  | -0.135583000 |
| H | -6.360643000 | 3.541944000  | 0.667026000  |
| H | -6.458545000 | 3.325261000  | -1.082113000 |
| H | -7.937643000 | 3.600385000  | -0.147734000 |
| C | -7.978785000 | 1.023525000  | -1.075973000 |
| H | -8.125805000 | -0.055578000 | -0.960513000 |
| H | -8.965764000 | 1.503018000  | -1.098550000 |
| H | -7.505100000 | 1.189657000  | -2.048964000 |
| C | -7.877291000 | 1.362221000  | 1.379815000  |
| H | -8.052057000 | 0.297898000  | 1.571366000  |
| H | -7.333723000 | 1.773472000  | 2.237242000  |
| H | -8.854125000 | 1.857147000  | 1.337771000  |
| C | -3.520191000 | -1.217150000 | 2.401919000  |
| C | -2.177862000 | -0.655645000 | 2.899523000  |
| H | -1.397442000 | -0.738270000 | 2.141662000  |
| H | -2.274638000 | 0.402159000  | 3.170780000  |
| H | -1.852085000 | -1.205966000 | 3.791780000  |
| C | -4.510272000 | -1.123894000 | 3.566584000  |

|   |              |              |             |
|---|--------------|--------------|-------------|
| H | -4.670719000 | -0.088619000 | 3.889686000 |
| H | -5.485577000 | -1.559592000 | 3.319935000 |
| H | -4.111024000 | -1.679228000 | 4.422386000 |
| C | -3.363980000 | -2.705263000 | 2.053244000 |
| H | -4.323908000 | -3.139537000 | 1.750336000 |
| H | -2.656361000 | -2.849468000 | 1.236714000 |
| H | -2.998411000 | -3.264926000 | 2.923521000 |

124

B\_TS4 (Full mode) E = -3628.76250105 Imaginary Frequency= 412.6185

|    |              |              |              |
|----|--------------|--------------|--------------|
| C  | -0.802674000 | 0.666330000  | -3.538315000 |
| C  | 0.576471000  | 1.050848000  | -2.994888000 |
| N  | 0.948546000  | 0.062554000  | -2.003614000 |
| C  | 2.156553000  | -0.389256000 | -1.931883000 |
| C  | 2.639770000  | -1.325986000 | -0.960980000 |
| C  | 1.834406000  | -1.799465000 | 0.129996000  |
| C  | 2.483392000  | -2.565305000 | 1.152342000  |
| C  | 3.828748000  | -2.881252000 | 0.988878000  |
| C  | 4.618628000  | -2.473801000 | -0.104381000 |
| C  | 3.997485000  | -1.682028000 | -1.051692000 |
| N  | -1.615899000 | 0.292953000  | -2.401308000 |
| C  | -2.847646000 | 0.660494000  | -2.288169000 |
| C  | -3.691214000 | 0.337234000  | -1.174174000 |
| C  | -3.293826000 | -0.590346000 | -0.155901000 |
| C  | -4.160061000 | -0.750103000 | 0.974175000  |
| C  | -5.351871000 | -0.039558000 | 0.994058000  |
| C  | -5.784809000 | 0.835407000  | -0.026183000 |
| C  | -4.930860000 | 1.005984000  | -1.097064000 |
| O  | -2.200138000 | -1.292480000 | -0.246157000 |
| Al | -0.595452000 | -0.807612000 | -1.040640000 |
| O  | 0.569136000  | -1.521961000 | 0.226382000  |
| H  | -3.294532000 | 1.293090000  | -3.072422000 |
| H  | 2.906846000  | -0.013571000 | -2.644828000 |
| H  | -5.182850000 | 1.684304000  | -1.911078000 |
| H  | -6.001843000 | -0.154387000 | 1.858264000  |
| H  | 4.305453000  | -3.473842000 | 1.761736000  |
| H  | 4.564501000  | -1.283904000 | -1.895160000 |
| H  | -1.251379000 | 1.481910000  | -4.124623000 |
| H  | -0.696400000 | -0.219228000 | -4.179706000 |
| H  | 1.322312000  | 1.132230000  | -3.798457000 |
| H  | 0.510113000  | 2.034805000  | -2.500448000 |
| C  | -1.068511000 | -3.357220000 | -2.444235000 |
| C  | -2.542023000 | -3.212247000 | -2.810965000 |
| O  | -0.415932000 | -2.149316000 | -2.267946000 |
| H  | -0.574029000 | -3.916905000 | -3.263530000 |

|    |              |              |              |
|----|--------------|--------------|--------------|
| H  | -2.993428000 | -4.182690000 | -3.043995000 |
| C  | -0.856159000 | -4.151099000 | -1.162381000 |
| H  | 0.209595000  | -4.241095000 | -0.942950000 |
| H  | -1.354606000 | -3.658967000 | -0.323691000 |
| Cl | -1.513471000 | -5.850666000 | -1.222750000 |
| H  | -2.637697000 | -2.565678000 | -3.690176000 |
| H  | -3.105716000 | -2.756583000 | -1.990427000 |
| C  | 0.137257000  | 1.810206000  | 0.505677000  |
| C  | 0.739382000  | 1.782312000  | 1.884338000  |
| O  | -0.712838000 | 0.740445000  | 0.186876000  |
| H  | 0.902975000  | 2.016081000  | -0.263944000 |
| H  | 1.103304000  | 2.778275000  | 2.161063000  |
| C  | -1.132934000 | 2.499096000  | 0.295448000  |
| H  | -1.449378000 | 2.734317000  | -0.713349000 |
| H  | -1.883296000 | 2.446237000  | 1.070958000  |
| H  | 1.572849000  | 1.073588000  | 1.923325000  |
| H  | -0.013673000 | 1.476954000  | 2.617237000  |
| C  | 3.537435000  | 4.111203000  | 0.773725000  |
| C  | 3.906693000  | 3.933286000  | 2.224145000  |
| O  | 3.711493000  | 5.507478000  | 0.451690000  |
| H  | 2.494568000  | 3.823105000  | 0.619712000  |
| H  | 3.831329000  | 2.878759000  | 2.504828000  |
| C  | 4.420098000  | 3.355274000  | -0.203435000 |
| H  | 4.165732000  | 3.623139000  | -1.232420000 |
| H  | 5.479205000  | 3.563128000  | -0.029251000 |
| Cl | 4.185861000  | 1.577561000  | -0.063192000 |
| H  | 3.219933000  | 4.513489000  | 2.843612000  |
| H  | 4.930226000  | 4.274299000  | 2.410286000  |
| C  | 1.878310000  | 5.346161000  | -1.204583000 |
| C  | 2.848107000  | 6.137443000  | -0.387009000 |
| C  | 0.694635000  | 4.866847000  | -0.802696000 |
| C  | 0.212674000  | 4.981598000  | 0.620755000  |
| O  | -0.923874000 | 4.455460000  | 0.887217000  |
| O  | 0.959520000  | 5.580008000  | 1.418463000  |
| O  | 2.999244000  | 7.323007000  | -0.587820000 |
| H  | 2.160190000  | 5.291618000  | -2.256336000 |
| H  | 0.033119000  | 4.400664000  | -1.534791000 |
| C  | 6.099412000  | -2.827085000 | -0.246760000 |
| C  | 6.322942000  | -3.585747000 | -1.562465000 |
| H  | 6.011517000  | -2.989561000 | -2.426477000 |
| H  | 7.383768000  | -3.834132000 | -1.692569000 |
| H  | 5.749248000  | -4.518525000 | -1.581134000 |
| C  | 6.934132000  | -1.538202000 | -0.267306000 |
| H  | 6.803301000  | -0.969665000 | 0.659539000  |

|   |              |              |              |
|---|--------------|--------------|--------------|
| H | 8.000890000  | -1.768618000 | -0.381460000 |
| H | 6.642632000  | -0.882482000 | -1.094392000 |
| C | 6.600879000  | -3.703230000 | 0.901354000  |
| H | 6.507575000  | -3.199390000 | 1.869586000  |
| H | 6.054422000  | -4.650946000 | 0.960042000  |
| H | 7.660410000  | -3.939277000 | 0.752538000  |
| C | 1.720722000  | -2.965341000 | 2.421667000  |
| C | 1.280181000  | -1.693019000 | 3.163591000  |
| H | 2.148740000  | -1.086524000 | 3.447247000  |
| H | 0.620093000  | -1.082417000 | 2.544648000  |
| H | 0.739304000  | -1.958642000 | 4.080547000  |
| C | 0.481118000  | -3.816748000 | 2.104875000  |
| H | -0.255583000 | -3.254084000 | 1.530544000  |
| H | 0.747412000  | -4.717256000 | 1.539191000  |
| H | 0.006468000  | -4.138305000 | 3.040693000  |
| C | 2.596026000  | -3.777428000 | 3.380640000  |
| H | 2.935830000  | -4.719087000 | 2.933877000  |
| H | 3.478531000  | -3.218401000 | 3.712163000  |
| H | 2.012757000  | -4.028087000 | 4.273100000  |
| C | -3.741468000 | -1.653583000 | 2.137376000  |
| C | -2.391579000 | -1.184125000 | 2.705873000  |
| H | -1.595445000 | -1.218940000 | 1.960261000  |
| H | -2.463182000 | -0.151871000 | 3.070636000  |
| H | -2.102481000 | -1.821080000 | 3.551648000  |
| C | -3.635084000 | -3.113330000 | 1.668605000  |
| H | -4.605974000 | -3.483593000 | 1.319213000  |
| H | -2.918158000 | -3.223151000 | 0.854089000  |
| H | -3.307988000 | -3.753159000 | 2.497757000  |
| C | -4.755646000 | -1.614853000 | 3.284088000  |
| H | -4.874799000 | -0.605196000 | 3.694559000  |
| H | -5.743579000 | -1.979350000 | 2.978482000  |
| H | -4.404863000 | -2.260880000 | 4.096142000  |
| C | -7.121000000 | 1.559013000  | 0.118391000  |
| C | -7.442262000 | 2.415647000  | -1.106052000 |
| H | -6.694301000 | 3.200762000  | -1.260811000 |
| H | -7.494597000 | 1.812425000  | -2.019540000 |
| H | -8.412894000 | 2.906298000  | -0.974738000 |
| C | -7.075918000 | 2.474291000  | 1.350936000  |
| H | -8.032042000 | 2.995870000  | 1.482314000  |
| H | -6.877586000 | 1.906445000  | 2.266150000  |
| H | -6.287148000 | 3.227363000  | 1.252198000  |
| C | -8.250936000 | 0.535061000  | 0.298273000  |
| H | -8.094905000 | -0.088628000 | 1.184589000  |
| H | -9.216188000 | 1.042706000  | 0.415890000  |

|      |               |              |              |
|------|---------------|--------------|--------------|
| H    | -8.319616000  | -0.131980000 | -0.567957000 |
| 84   |               |              |              |
| B1 E | -2209.8431603 |              |              |
| C    | 0.577963285   | -3.826449921 | -0.717106511 |
| C    | -0.665251199  | -3.942309168 | 0.156159739  |
| N    | -1.307351084  | -2.642610437 | 0.107330629  |
| C    | -2.596365171  | -2.531328901 | 0.005335499  |
| C    | -3.300035157  | -1.294346580 | -0.071531999 |
| C    | -2.602349134  | -0.053653107 | -0.152377355 |
| C    | -3.359173578  | 1.148569731  | -0.280230329 |
| C    | -4.742533137  | 1.035750978  | -0.295131502 |
| C    | -5.458126079  | -0.180102083 | -0.211857922 |
| C    | -4.711826108  | -1.334414198 | -0.109487502 |
| N    | 1.186665434   | -2.529868568 | -0.431785770 |
| C    | 2.474320324   | -2.389237512 | -0.588399253 |
| C    | 3.214848437   | -1.194129484 | -0.383340821 |
| C    | 2.566644063   | 0.038782895  | -0.057905485 |
| C    | 3.372342693   | 1.198219696  | 0.135027711  |
| C    | 4.748053657   | 1.063890163  | -0.023823922 |
| C    | 5.409229572   | -0.136030510 | -0.362911878 |
| C    | 4.616228518   | -1.252257605 | -0.535420440 |
| O    | 1.265665199   | 0.108086795  | 0.036840160  |
| A1   | -0.002630305  | -1.147872026 | 0.374100558  |
| O    | -1.291757300  | 0.000737111  | -0.139449742 |
| H    | 3.054356745   | -3.266884235 | -0.904973219 |
| H    | -3.202893513  | -3.446999279 | -0.033565747 |
| H    | 5.060602330   | -2.214733689 | -0.791223452 |
| H    | 5.358046966   | 1.947124955  | 0.127757628  |
| H    | -5.326419312  | 1.948431144  | -0.377651426 |
| H    | -5.190586466  | -2.309686043 | -0.048020066 |
| Cl   | 0.172690956   | -1.401057183 | 2.520690248  |
| H    | 1.280971879   | -4.649140073 | -0.539832286 |
| H    | 0.285303414   | -3.855992310 | -1.775746950 |
| H    | -1.328735163  | -4.749153721 | -0.178664462 |
| H    | -0.370018444  | -4.140103786 | 1.195596258  |
| C    | 6.926589558   | -0.230788392 | -0.530952252 |
| C    | 7.253606228   | -0.709609837 | -1.952319189 |
| H    | 8.337613546   | -0.793989959 | -2.090413469 |
| H    | 6.816647852   | -1.692175045 | -2.158401892 |
| H    | 6.869627490   | -0.010940771 | -2.702866136 |
| C    | 7.489416606   | -1.241112026 | 0.478403970  |
| H    | 8.576099127   | -1.331635901 | 0.367897645  |
| H    | 7.277455241   | -0.932048879 | 1.507058805  |
| H    | 7.057714759   | -2.237114288 | 0.335770769  |

|   |               |               |               |
|---|---------------|---------------|---------------|
| C | 7. 620656057  | 1. 112333054  | -0. 305441793 |
| H | 7. 280001801  | 1. 873790434  | -1. 015186012 |
| H | 7. 455147458  | 1. 494558125  | 0. 707431685  |
| H | 8. 700865734  | 0. 997080461  | -0. 440169331 |
| C | 2. 733741876  | 2. 530917328  | 0. 533926313  |
| C | 3. 778619574  | 3. 637978507  | 0. 693481800  |
| H | 4. 511591814  | 3. 407996603  | 1. 474744226  |
| H | 4. 320965409  | 3. 834967087  | -0. 238328869 |
| H | 3. 275879428  | 4. 566447296  | 0. 981944849  |
| C | 2. 012412716  | 2. 378238780  | 1. 883375543  |
| H | 1. 232633056  | 1. 615742647  | 1. 851502367  |
| H | 2. 719855990  | 2. 104872275  | 2. 673814220  |
| H | 1. 546004192  | 3. 329969174  | 2. 164553784  |
| C | 1. 736382184  | 2. 989282480  | -0. 541030438 |
| H | 2. 231620423  | 3. 106870951  | -1. 511767239 |
| H | 0. 913266638  | 2. 283354029  | -0. 655907125 |
| H | 1. 312820634  | 3. 961815393  | -0. 262567861 |
| C | -2. 654890942 | 2. 502580220  | -0. 399626351 |
| C | -1. 805594584 | 2. 530660418  | -1. 680736032 |
| H | -1. 291542750 | 3. 495224175  | -1. 766812559 |
| H | -1. 049022134 | 1. 743894898  | -1. 682195614 |
| H | -2. 437599201 | 2. 407215071  | -2. 567477798 |
| C | -1. 763304347 | 2. 760710845  | 0. 826340120  |
| H | -0. 957907692 | 2. 029810022  | 0. 912069803  |
| H | -1. 308030415 | 3. 755134910  | 0. 747587057  |
| H | -2. 351409012 | 2. 734905294  | 1. 750293058  |
| C | -3. 657096347 | 3. 656177886  | -0. 486990869 |
| H | -4. 309176018 | 3. 574746054  | -1. 363937643 |
| H | -4. 289337009 | 3. 723531228  | 0. 405542226  |
| H | -3. 111114318 | 4. 600801774  | -0. 573392765 |
| C | -6. 983859766 | -0. 154465289 | -0. 241617720 |
| C | -7. 579337632 | -1. 558074349 | -0. 143315983 |
| H | -7. 264500241 | -2. 193551041 | -0. 978276650 |
| H | -7. 295391334 | -2. 056394701 | 0. 789852454  |
| H | -8. 672256189 | -1. 501913429 | -0. 166991735 |
| C | -7. 504291779 | 0. 677600820  | 0. 938961220  |
| H | -7. 136691817 | 1. 708103926  | 0. 902177739  |
| H | -8. 599412136 | 0. 716663785  | 0. 927556890  |
| H | -7. 189721516 | 0. 246577845  | 1. 894938087  |
| C | -7. 460433039 | 0. 484428288  | -1. 553736493 |
| H | -8. 555147412 | 0. 522602916  | -1. 586696737 |
| H | -7. 091081713 | 1. 509119823  | -1. 663990229 |
| H | -7. 114637668 | -0. 088703698 | -2. 420330406 |

|    |    |               |              |              |
|----|----|---------------|--------------|--------------|
| C1 | E= | -2362.2714679 |              |              |
| C  |    | -0.757192000  | 5.900895000  | -0.175387000 |
| C  |    | -1.433701000  | 4.688542000  | -0.158794000 |
| C  |    | -0.720689000  | 3.485669000  | -0.141089000 |
| C  |    | 0.691838000   | 3.512039000  | -0.118898000 |
| C  |    | 1.359694000   | 4.740841000  | -0.130136000 |
| C  |    | 0.639229000   | 5.926827000  | -0.163305000 |
| N  |    | 1.285877000   | 2.244042000  | -0.078432000 |
| C  |    | 2.586657000   | 2.088432000  | -0.153801000 |
| C  |    | 3.269343000   | 0.849353000  | -0.154836000 |
| C  |    | 2.565081000   | -0.392494000 | -0.205913000 |
| C  |    | 3.319138000   | -1.602039000 | -0.293316000 |
| C  |    | 4.701447000   | -1.495449000 | -0.285241000 |
| C  |    | 5.424621000   | -0.279810000 | -0.223026000 |
| C  |    | 4.685994000   | 0.879254000  | -0.171235000 |
| N  |    | -1.277385000  | 2.195668000  | -0.113811000 |
| C  |    | -2.563550000  | 2.011560000  | -0.310304000 |
| C  |    | -3.252506000  | 0.778671000  | -0.243219000 |
| C  |    | -2.568861000  | -0.455111000 | -0.003085000 |
| C  |    | -3.340517000  | -1.647454000 | 0.118779000  |
| C  |    | -4.716973000  | -1.545678000 | -0.050447000 |
| C  |    | -5.412359000  | -0.347789000 | -0.328986000 |
| C  |    | -4.655299000  | 0.800995000  | -0.415161000 |
| O  |    | -1.267539000  | -0.489351000 | 0.080516000  |
| Al |    | 0.018310000   | 0.751853000  | 0.394590000  |
| O  |    | 1.257966000   | -0.428270000 | -0.205223000 |
| H  |    | -3.184489000  | 2.882243000  | -0.542418000 |
| H  |    | 3.221258000   | 2.975835000  | -0.241244000 |
| H  |    | -5.127425000  | 1.764722000  | -0.608017000 |
| H  |    | -5.300627000  | -2.454452000 | 0.041492000  |
| H  |    | 5.281804000   | -2.412909000 | -0.330845000 |
| H  |    | 5.169333000   | 1.853271000  | -0.134342000 |
| H  |    | -1.319630000  | 6.829344000  | -0.181571000 |
| H  |    | -2.518550000  | 4.686475000  | -0.137394000 |
| H  |    | 1.166616000   | 6.875689000  | -0.164531000 |
| H  |    | 2.443662000   | 4.778612000  | -0.099808000 |
| Cl |    | 0.138731000   | 0.887092000  | 2.543704000  |
| C  |    | -6.929603000  | -0.293064000 | -0.515258000 |
| C  |    | -2.667382000  | -2.979687000 | 0.454451000  |
| C  |    | -1.655299000  | -3.355078000 | -0.637709000 |
| H  |    | -2.147053000  | -3.449952000 | -1.612700000 |
| H  |    | -0.859649000  | -2.615035000 | -0.722593000 |
| H  |    | -1.194951000  | -4.321783000 | -0.400510000 |
| C  |    | -1.957558000  | -2.869400000 | 1.814211000  |

|   |              |              |              |
|---|--------------|--------------|--------------|
| H | -1.212072000 | -2.072490000 | 1.829848000  |
| H | -2.680494000 | -2.672776000 | 2.613431000  |
| H | -1.449579000 | -3.812900000 | 2.046101000  |
| C | -3.680423000 | -4.122324000 | 0.555320000  |
| H | -4.425183000 | -3.949521000 | 1.340166000  |
| H | -4.210020000 | -4.292798000 | -0.388914000 |
| H | -3.152339000 | -5.047823000 | 0.805339000  |
| C | -7.541645000 | 0.631194000  | 0.546603000  |
| H | -7.147124000 | 1.649665000  | 0.471931000  |
| H | -8.629465000 | 0.687846000  | 0.426196000  |
| H | -7.330796000 | 0.266730000  | 1.557176000  |
| C | -7.251791000 | 0.263805000  | -1.908874000 |
| H | -8.335867000 | 0.320368000  | -2.059314000 |
| H | -6.845847000 | 1.271440000  | -2.045049000 |
| H | -6.833161000 | -0.372335000 | -2.695559000 |
| C | -7.580148000 | -1.670400000 | -0.385941000 |
| H | -7.202350000 | -2.374388000 | -1.135098000 |
| H | -7.418533000 | -2.109351000 | 0.604318000  |
| H | -8.661285000 | -1.582927000 | -0.533035000 |
| C | 2.613195000  | -2.955110000 | -0.395652000 |
| C | 1.800288000  | -3.004562000 | -1.699242000 |
| H | 1.263549000  | -3.957690000 | -1.771218000 |
| H | 1.065812000  | -2.198914000 | -1.749461000 |
| H | 2.461603000  | -2.924765000 | -2.569391000 |
| C | 1.692463000  | -3.177643000 | 0.814934000  |
| H | 2.261438000  | -3.140677000 | 1.750460000  |
| H | 0.896456000  | -2.434236000 | 0.870647000  |
| H | 1.225772000  | -4.167532000 | 0.745788000  |
| C | 3.610335000  | -4.115699000 | -0.431134000 |
| H | 4.283729000  | -4.059516000 | -1.293826000 |
| H | 4.220039000  | -4.165156000 | 0.478093000  |
| H | 3.060553000  | -5.058943000 | -0.508076000 |
| C | 6.949901000  | -0.317924000 | -0.221852000 |
| C | 7.554230000  | 1.083596000  | -0.154707000 |
| H | 7.261889000  | 1.694808000  | -1.015523000 |
| H | 7.254778000  | 1.612667000  | 0.756383000  |
| H | 8.646848000  | 1.018721000  | -0.153629000 |
| C | 7.438795000  | -1.117370000 | 0.994285000  |
| H | 7.063735000  | -2.145795000 | 0.981708000  |
| H | 8.533469000  | -1.165179000 | 1.006238000  |
| H | 7.108723000  | -0.654580000 | 1.929919000  |
| C | 7.446595000  | -1.000837000 | -1.504035000 |
| H | 8.541313000  | -1.047818000 | -1.513673000 |
| H | 7.072055000  | -2.025956000 | -1.590102000 |



|    |                  |              |              |
|----|------------------|--------------|--------------|
| H  | 7.122665000      | -0.452398000 | -2.394662000 |
| 90 |                  |              |              |
| A1 | E= -2438.4969869 |              |              |
| C1 | -0.080122000     | 0.629854000  | 2.217994000  |
| A1 | -0.005937000     | 0.676338000  | 0.065077000  |
| O  | 1.265721000      | -0.495801000 | -0.421168000 |
| O  | -1.282702000     | -0.353052000 | -0.680140000 |
| N  | 1.305364000      | 2.180486000  | -0.353968000 |
| N  | -1.281631000     | 2.238258000  | -0.205081000 |
| C  | 2.566033000      | -0.480394000 | -0.215414000 |
| C  | -2.575270000     | -0.362967000 | -0.415021000 |
| C  | -3.319487000     | -1.568192000 | -0.575123000 |
| C  | 3.275082000      | -1.708355000 | -0.061971000 |
| C  | 0.751384000      | 3.405248000  | -0.541565000 |
| C  | 2.658732000      | 2.023859000  | -0.450199000 |
| C  | -0.708167000     | 3.448033000  | -0.390630000 |
| C  | 4.646345000      | -1.653380000 | 0.162171000  |
| C  | -2.634237000     | 2.123836000  | -0.098629000 |
| C  | 4.678206000      | 0.718911000  | 0.085042000  |
| C  | 3.293458000      | 0.744443000  | -0.179712000 |
| C  | 5.378649000      | -0.458962000 | 0.262164000  |
| C  | 1.499221000      | 4.525899000  | -0.866975000 |
| C  | -3.260990000     | 0.816979000  | 0.000137000  |
| C  | -1.442110000     | 4.623678000  | -0.432802000 |
| C  | 3.443365000      | 3.135549000  | -0.836205000 |
| C  | 2.873243000      | 4.373121000  | -1.035544000 |
| C  | -4.657474000     | -1.569036000 | -0.194593000 |
| C  | -2.827464000     | 4.534662000  | -0.309134000 |
| C  | -4.609635000     | 0.729523000  | 0.397736000  |
| C  | -3.418409000     | 3.298263000  | -0.162627000 |
| C  | -5.326462000     | -0.450324000 | 0.329684000  |
| H  | 5.177111000      | -2.588970000 | 0.291720000  |
| H  | 5.210060000      | 1.659603000  | 0.197253000  |
| H  | -5.210660000     | -2.495909000 | -0.288161000 |
| H  | -5.095873000     | 1.613532000  | 0.801981000  |
| H  | -4.497233000     | 3.218567000  | -0.131211000 |
| H  | -3.439640000     | 5.430459000  | -0.351932000 |
| H  | -0.955861000     | 5.582889000  | -0.560126000 |
| H  | 1.022761000      | 5.486568000  | -1.017414000 |
| H  | 3.487723000      | 5.216893000  | -1.334714000 |
| H  | 4.503415000      | 2.999975000  | -1.004161000 |
| C  | 6.875344000      | -0.421073000 | 0.575279000  |
| C  | -6.777017000     | -0.496451000 | 0.812168000  |
| C  | -7.613685000     | 0.527857000  | 0.032668000  |

|   |              |              |              |
|---|--------------|--------------|--------------|
| H | -8.655799000 | 0.512741000  | 0.372024000  |
| H | -7.237475000 | 1.547105000  | 0.170810000  |
| H | -7.603161000 | 0.311918000  | -1.040817000 |
| C | -7.407544000 | -1.875399000 | 0.617891000  |
| H | -8.443664000 | -1.861683000 | 0.971172000  |
| H | -7.422635000 | -2.174114000 | -0.435807000 |
| H | -6.878001000 | -2.650299000 | 1.182045000  |
| C | -6.826556000 | -0.148435000 | 2.306493000  |
| H | -6.241959000 | -0.860859000 | 2.897294000  |
| H | -6.424045000 | 0.850850000  | 2.501670000  |
| H | -7.859420000 | -0.168812000 | 2.673166000  |
| C | -2.648911000 | -2.841471000 | -1.097225000 |
| C | -3.645567000 | -3.993410000 | -1.251092000 |
| H | -4.086268000 | -4.293905000 | -0.294171000 |
| H | -4.460323000 | -3.748412000 | -1.941908000 |
| H | -3.122644000 | -4.865878000 | -1.655593000 |
| C | -1.569202000 | -3.290150000 | -0.104991000 |
| H | -0.786358000 | -2.539052000 | -0.005997000 |
| H | -1.997548000 | -3.473628000 | 0.887021000  |
| H | -1.102993000 | -4.221628000 | -0.448625000 |
| C | -2.021138000 | -2.596140000 | -2.478522000 |
| H | -2.787378000 | -2.310734000 | -3.208284000 |
| H | -1.263049000 | -1.812781000 | -2.447531000 |
| H | -1.544932000 | -3.516401000 | -2.837165000 |
| C | 2.533703000  | -3.047249000 | -0.065507000 |
| C | 1.730198000  | -3.230787000 | -1.362852000 |
| H | 1.231257000  | -4.207163000 | -1.353018000 |
| H | 0.969191000  | -2.462318000 | -1.494911000 |
| H | 2.397973000  | -3.208638000 | -2.231928000 |
| C | 1.619460000  | -3.102852000 | 1.169172000  |
| H | 0.932631000  | -2.256308000 | 1.216841000  |
| H | 1.025087000  | -4.024224000 | 1.162022000  |
| H | 2.220610000  | -3.096301000 | 2.085155000  |
| C | 3.494072000  | -4.237053000 | 0.029315000  |
| H | 4.199738000  | -4.267570000 | -0.808777000 |
| H | 4.068417000  | -4.238721000 | 0.962056000  |
| H | 2.914334000  | -5.165329000 | 0.005396000  |
| C | 7.099842000  | 0.318399000  | 1.901667000  |
| H | 8.168308000  | 0.363157000  | 2.142512000  |
| H | 6.725752000  | 1.346571000  | 1.858885000  |
| H | 6.586408000  | -0.186106000 | 2.726476000  |
| C | 7.617375000  | 0.323468000  | -0.543555000 |
| H | 7.261089000  | 1.353676000  | -0.649491000 |
| H | 8.691865000  | 0.366540000  | -0.331422000 |

|    |                   |              |              |
|----|-------------------|--------------|--------------|
| H  | 7.481612000       | -0.176117000 | -1.508418000 |
| C  | 7.476026000       | -1.821490000 | 0.697317000  |
| H  | 7.019308000       | -2.393223000 | 1.511988000  |
| H  | 7.361134000       | -2.397892000 | -0.226907000 |
| H  | 8.547620000       | -1.747307000 | 0.908813000  |
| 74 |                   |              |              |
| D1 | E = -2353.0322195 |              |              |
| C1 | -0.042538000      | 0.643653000  | 2.318618000  |
| A1 | -0.001310000      | 0.698238000  | 0.163988000  |
| O  | 1.272042000       | -0.458725000 | -0.346161000 |
| O  | -1.282396000      | -0.333853000 | -0.564365000 |
| N  | 1.292661000       | 2.216153000  | -0.269244000 |
| N  | -1.293607000      | 2.254111000  | -0.078777000 |
| C  | 2.577624000       | -0.432700000 | -0.158419000 |
| C  | -2.573248000      | -0.353916000 | -0.279060000 |
| C  | -3.304937000      | -1.568939000 | -0.425442000 |
| C  | 3.293942000       | -1.657376000 | -0.009274000 |
| C  | 0.726280000       | 3.437824000  | -0.437802000 |
| C  | 2.645383000       | 2.072709000  | -0.390082000 |
| C  | -0.730761000      | 3.469081000  | -0.261815000 |
| C  | 4.670718000       | -1.606383000 | 0.186519000  |
| C  | -2.643736000      | 2.131970000  | 0.047242000  |
| C  | 4.687985000       | 0.791396000  | 0.090469000  |
| C  | 3.297259000       | 0.796944000  | -0.138457000 |
| C  | 5.370789000       | -0.395044000 | 0.252781000  |
| C  | 1.459487000       | 4.566903000  | -0.768273000 |
| C  | -3.263558000      | 0.820472000  | 0.144170000  |
| C  | -1.472144000      | 4.640905000  | -0.280592000 |
| C  | 3.415047000       | 3.193229000  | -0.778309000 |
| C  | 2.831731000       | 4.427426000  | -0.959746000 |
| C  | -4.641583000      | -1.592697000 | -0.037030000 |
| C  | -2.854420000      | 4.543064000  | -0.134063000 |
| C  | -4.609055000      | 0.734388000  | 0.550270000  |
| C  | -3.435575000      | 3.301718000  | 0.009812000  |
| C  | -5.289321000      | -0.462866000 | 0.479613000  |
| H  | 5.214843000       | -2.533439000 | 0.316465000  |
| H  | 5.250725000       | 1.712068000  | 0.190863000  |
| H  | -5.192770000      | -2.521253000 | -0.117590000 |
| H  | -5.133916000      | 1.591123000  | 0.957225000  |
| H  | -4.512732000      | 3.215473000  | 0.062302000  |
| H  | -3.472227000      | 5.435710000  | -0.155640000 |
| H  | -0.993253000      | 5.604111000  | -0.405539000 |
| H  | 0.972701000       | 5.524598000  | -0.903729000 |
| H  | 3.434607000       | 5.278741000  | -1.261044000 |

|   |              |              |              |
|---|--------------|--------------|--------------|
| H | 4.473846000  | 3.067851000  | -0.959872000 |
| C | -2.625023000 | -2.838199000 | -0.944712000 |
| C | -3.608779000 | -4.003324000 | -1.080471000 |
| H | -4.037378000 | -4.301124000 | -0.117063000 |
| H | -4.431148000 | -3.774622000 | -1.767982000 |
| H | -3.078921000 | -4.873214000 | -1.481166000 |
| C | -1.532311000 | -3.264833000 | 0.043002000  |
| H | -0.759134000 | -2.502366000 | 0.129820000  |
| H | -1.950882000 | -3.445785000 | 1.039633000  |
| H | -1.056835000 | -4.192808000 | -0.297249000 |
| C | -2.012554000 | -2.595958000 | -2.333270000 |
| H | -2.788839000 | -2.327775000 | -3.058880000 |
| H | -1.265870000 | -1.801504000 | -2.314698000 |
| H | -1.526545000 | -3.512769000 | -2.687513000 |
| C | 2.558363000  | -2.998960000 | 0.013689000  |
| C | 1.734411000  | -3.197706000 | -1.268356000 |
| H | 1.238716000  | -4.175356000 | -1.240125000 |
| H | 0.969998000  | -2.431868000 | -1.395142000 |
| H | 2.387878000  | -3.182665000 | -2.148350000 |
| C | 1.666706000  | -3.042845000 | 1.265218000  |
| H | 0.979977000  | -2.196455000 | 1.316283000  |
| H | 1.074379000  | -3.965402000 | 1.278431000  |
| H | 2.284424000  | -3.025349000 | 2.169966000  |
| C | 3.524127000  | -4.184601000 | 0.104646000  |
| H | 4.213433000  | -4.223805000 | -0.746711000 |
| H | 4.114675000  | -4.173849000 | 1.027328000  |
| H | 2.947365000  | -5.114907000 | 0.102777000  |
| O | 6.717897000  | -0.297219000 | 0.485710000  |
| O | -6.586022000 | -0.456174000 | 0.922978000  |
| C | -7.287757000 | -1.680054000 | 0.882223000  |
| H | -6.798087000 | -2.449701000 | 1.493411000  |
| H | -8.277329000 | -1.474142000 | 1.290237000  |
| H | -7.393147000 | -2.055741000 | -0.144424000 |
| C | 7.424842000  | -1.500888000 | 0.694526000  |
| H | 8.461285000  | -1.214825000 | 0.873692000  |
| H | 7.045534000  | -2.048963000 | 1.567179000  |
| H | 7.379668000  | -2.157707000 | -0.184455000 |

118

E1 E = -3205.3794186

|    |              |             |              |
|----|--------------|-------------|--------------|
| Cl | -0.024236000 | 1.633076000 | 1.969713000  |
| Al | -0.010499000 | 1.876599000 | -0.171946000 |
| O  | 1.237753000  | 0.738978000 | -0.793805000 |
| O  | -1.324711000 | 0.911344000 | -0.942372000 |
| N  | 1.305198000  | 3.395639000 | -0.495000000 |

S100

|   |              |              |              |
|---|--------------|--------------|--------------|
| N | -1.276707000 | 3.462757000  | -0.282143000 |
| C | 2.541931000  | 0.724540000  | -0.617516000 |
| C | -2.605716000 | 0.892654000  | -0.628225000 |
| C | -3.362485000 | -0.307027000 | -0.811516000 |
| C | 3.243366000  | -0.521693000 | -0.580796000 |
| C | 0.760869000  | 4.637180000  | -0.564915000 |
| C | 2.656038000  | 3.236023000  | -0.625262000 |
| C | -0.695027000 | 4.679098000  | -0.383622000 |
| C | 4.606964000  | -0.491234000 | -0.343352000 |
| C | -2.628411000 | 3.352393000  | -0.149838000 |
| C | 4.674966000  | 1.881340000  | -0.225569000 |
| C | 3.282619000  | 1.933980000  | -0.480641000 |
| C | 5.350416000  | 0.684776000  | -0.146961000 |
| C | 1.514693000  | 5.775845000  | -0.800641000 |
| C | -3.267320000 | 2.049499000  | -0.121903000 |
| C | -1.416953000 | 5.860798000  | -0.316739000 |
| C | 3.445804000  | 4.372277000  | -0.920654000 |
| C | 2.885123000  | 5.627074000  | -1.000886000 |
| C | -4.675057000 | -0.317880000 | -0.371286000 |
| C | -2.800312000 | 5.774746000  | -0.169931000 |
| C | -4.605580000 | 1.953047000  | 0.329173000  |
| C | -3.400607000 | 4.536282000  | -0.104642000 |
| C | -5.316852000 | 0.778854000  | 0.229840000  |
| H | 5.140214000  | -1.433983000 | -0.257721000 |
| H | 5.210854000  | 2.805338000  | -0.036555000 |
| H | -5.240867000 | -1.242176000 | -0.448593000 |
| H | -5.062775000 | 2.815194000  | 0.803583000  |
| H | -4.478949000 | 4.464699000  | -0.051753000 |
| H | -3.403854000 | 6.676485000  | -0.129432000 |
| H | -0.923469000 | 6.822624000  | -0.378986000 |
| H | 1.046120000  | 6.750305000  | -0.857164000 |
| H | 3.503823000  | 6.489009000  | -1.231680000 |
| H | 4.502309000  | 4.244307000  | -1.113954000 |
| C | -2.716079000 | -1.591116000 | -1.361086000 |
| C | -1.650036000 | -2.044142000 | -0.353937000 |
| H | -0.862015000 | -1.295896000 | -0.294019000 |
| H | -2.061808000 | -2.167995000 | 0.651822000  |
| H | -1.197213000 | -2.992373000 | -0.663518000 |
| C | -2.032396000 | -1.340652000 | -2.718898000 |
| H | -2.725484000 | -0.927073000 | -3.455485000 |
| H | -1.205864000 | -0.640227000 | -2.613640000 |
| H | -1.642716000 | -2.283317000 | -3.116908000 |
| C | 2.504725000  | -1.870421000 | -0.637995000 |
| C | 1.544472000  | -1.961232000 | -1.839005000 |

|   |              |              |              |
|---|--------------|--------------|--------------|
| H | 1.108436000  | -2.965689000 | -1.884293000 |
| H | 0.738149000  | -1.234767000 | -1.756595000 |
| H | 2.061376000  | -1.779346000 | -2.786730000 |
| C | 1.700117000  | -1.988781000 | 0.665128000  |
| H | 0.984097000  | -1.168199000 | 0.745077000  |
| H | 1.143651000  | -2.933764000 | 0.701657000  |
| H | 2.353940000  | -1.934392000 | 1.543471000  |
| C | 6.851059000  | 0.552436000  | 0.111420000  |
| C | -6.754403000 | 0.590511000  | 0.712766000  |
| C | 7.071466000  | -0.499372000 | 1.203532000  |
| C | 7.907746000  | -1.605851000 | 1.040260000  |
| C | 6.400619000  | -0.356651000 | 2.426014000  |
| C | 8.075581000  | -2.536856000 | 2.067135000  |
| H | 8.430408000  | -1.762009000 | 0.101373000  |
| C | 6.565137000  | -1.280192000 | 3.451754000  |
| H | 5.720056000  | 0.482781000  | 2.560503000  |
| C | 7.408435000  | -2.377926000 | 3.276354000  |
| H | 8.724556000  | -3.394485000 | 1.911223000  |
| H | 6.027760000  | -1.148739000 | 4.386825000  |
| H | 7.534979000  | -3.105531000 | 4.073257000  |
| C | -6.809381000 | -0.662143000 | 1.594230000  |
| C | -7.709761000 | -1.708407000 | 1.381734000  |
| C | -5.913449000 | -0.772568000 | 2.666939000  |
| C | -7.719559000 | -2.827530000 | 2.216729000  |
| H | -8.407949000 | -1.668276000 | 0.550680000  |
| C | -5.919934000 | -1.883965000 | 3.501458000  |
| H | -5.184321000 | 0.019397000  | 2.831174000  |
| C | -6.827657000 | -2.920181000 | 3.279523000  |
| H | -8.423984000 | -3.632407000 | 2.024087000  |
| H | -5.209695000 | -1.946516000 | 4.321500000  |
| H | -6.832119000 | -3.793495000 | 3.925862000  |
| C | 7.475052000  | 1.871969000  | 0.580690000  |
| H | 7.399307000  | 2.645153000  | -0.192344000 |
| H | 6.996235000  | 2.248137000  | 1.490517000  |
| H | 8.537123000  | 1.726460000  | 0.799081000  |
| C | 7.516238000  | 0.153216000  | -1.213319000 |
| H | 7.305869000  | 0.911024000  | -1.974084000 |
| H | 8.604095000  | 0.075017000  | -1.109784000 |
| H | 7.136944000  | -0.804618000 | -1.585247000 |
| C | -7.244631000 | 1.783382000  | 1.541994000  |
| H | -6.607212000 | 1.962730000  | 2.413763000  |
| H | -7.272623000 | 2.700218000  | 0.941996000  |
| H | -8.259082000 | 1.594220000  | 1.905123000  |
| C | -7.655323000 | 0.464649000  | -0.523313000 |

|   |              |              |              |
|---|--------------|--------------|--------------|
| H | -8.709602000 | 0.364345000  | -0.243309000 |
| H | -7.558001000 | 1.361041000  | -1.143232000 |
| H | -7.381711000 | -0.397722000 | -1.140787000 |
| C | 3.515535000  | -3.017024000 | -0.769656000 |
| C | 3.795088000  | -3.904212000 | 0.273706000  |
| C | 4.233024000  | -3.178342000 | -1.965398000 |
| C | 4.753127000  | -4.910134000 | 0.133213000  |
| H | 3.272115000  | -3.812429000 | 1.220533000  |
| C | 5.190913000  | -4.175723000 | -2.110922000 |
| H | 4.057967000  | -2.490116000 | -2.789545000 |
| C | 5.457965000  | -5.050513000 | -1.057297000 |
| H | 4.950586000  | -5.579686000 | 0.966487000  |
| H | 5.732629000  | -4.269629000 | -3.049087000 |
| H | 6.206832000  | -5.830388000 | -1.165817000 |
| C | -3.786632000 | -2.673131000 | -1.546731000 |
| C | -3.963321000 | -3.710663000 | -0.625322000 |
| C | -4.679251000 | -2.610892000 | -2.626891000 |
| C | -4.987107000 | -4.646791000 | -0.771998000 |
| H | -3.304321000 | -3.791092000 | 0.233231000  |
| C | -5.703690000 | -3.540754000 | -2.778617000 |
| H | -4.589595000 | -1.804984000 | -3.351122000 |
| C | -5.864689000 | -4.566920000 | -1.848337000 |
| H | -5.099916000 | -5.435985000 | -0.033178000 |
| H | -6.380546000 | -3.461192000 | -3.625720000 |
| H | -6.664807000 | -5.293307000 | -1.962780000 |

66

F1 E = -2322.4689162

|    |              |              |              |
|----|--------------|--------------|--------------|
| C1 | -0.033998000 | 0.597644000  | 2.365830000  |
| A1 | -0.001455000 | 0.612891000  | 0.214111000  |
| O  | 1.281492000  | -0.545462000 | -0.277590000 |
| O  | -1.275233000 | -0.452990000 | -0.484976000 |
| N  | 1.275841000  | 2.130275000  | -0.256709000 |
| N  | -1.309796000 | 2.146460000  | -0.058172000 |
| C  | 2.585952000  | -0.506087000 | -0.108990000 |
| C  | -2.564832000 | -0.478905000 | -0.210607000 |
| C  | -3.280466000 | -1.711636000 | -0.347528000 |
| C  | 3.308400000  | -1.732905000 | 0.050903000  |
| C  | 0.697460000  | 3.344616000  | -0.438953000 |
| C  | 2.629017000  | 1.997538000  | -0.382594000 |
| C  | -0.758996000 | 3.364565000  | -0.258099000 |
| C  | 4.683721000  | -1.670173000 | 0.226027000  |
| C  | -2.658111000 | 2.013468000  | 0.074119000  |
| C  | 4.691700000  | 0.739543000  | 0.089967000  |
| C  | 3.293003000  | 0.731043000  | -0.119414000 |

|   |              |              |              |
|---|--------------|--------------|--------------|
| C | 5.348658000  | -0.447778000 | 0.255500000  |
| C | 1.418844000  | 4.475922000  | -0.786702000 |
| C | -3.265112000 | 0.698090000  | 0.188397000  |
| C | -1.511330000 | 4.528995000  | -0.287904000 |
| C | 3.386696000  | 3.120157000  | -0.787508000 |
| C | 2.791435000  | 4.346771000  | -0.981563000 |
| C | -4.616360000 | -1.741757000 | 0.029565000  |
| C | -2.891905000 | 4.420146000  | -0.134870000 |
| C | -4.617600000 | 0.606769000  | 0.587417000  |
| C | -3.460876000 | 3.175187000  | 0.025699000  |
| C | -5.252295000 | -0.602064000 | 0.514221000  |
| H | 5.272034000  | -2.568881000 | 0.369322000  |
| H | 5.256191000  | 1.660256000  | 0.167925000  |
| H | -5.192982000 | -2.657802000 | -0.022762000 |
| H | -5.158886000 | 1.459101000  | 0.979459000  |
| H | -4.537200000 | 3.082163000  | 0.082418000  |
| H | -3.518207000 | 5.306470000  | -0.164369000 |
| H | -1.042167000 | 5.495151000  | -0.425736000 |
| H | 0.923005000  | 5.427334000  | -0.932618000 |
| H | 3.385457000  | 5.199578000  | -1.295492000 |
| H | 4.445813000  | 3.004615000  | -0.973444000 |
| C | -2.582846000 | -2.980577000 | -0.839490000 |
| C | -3.559839000 | -4.151654000 | -0.968784000 |
| H | -3.998786000 | -4.435712000 | -0.006309000 |
| H | -4.374857000 | -3.936678000 | -1.668928000 |
| H | -3.021880000 | -5.025234000 | -1.349647000 |
| C | -1.502229000 | -3.382707000 | 0.171503000  |
| H | -0.738887000 | -2.611058000 | 0.263755000  |
| H | -1.935884000 | -3.558820000 | 1.162322000  |
| H | -1.011175000 | -4.308532000 | -0.151080000 |
| C | -1.954198000 | -2.754531000 | -2.223417000 |
| H | -2.722566000 | -2.502627000 | -2.962946000 |
| H | -1.211294000 | -1.956496000 | -2.209458000 |
| H | -1.459328000 | -3.674130000 | -2.556656000 |
| C | 2.580115000  | -3.075981000 | 0.105775000  |
| C | 1.742913000  | -3.300940000 | -1.163031000 |
| H | 1.257860000  | -4.282777000 | -1.113294000 |
| H | 0.968725000  | -2.545461000 | -1.292272000 |
| H | 2.384944000  | -3.293816000 | -2.051336000 |
| C | 1.704462000  | -3.102182000 | 1.369105000  |
| H | 1.011952000  | -2.260123000 | 1.414032000  |
| H | 1.119345000  | -4.028373000 | 1.405312000  |
| H | 2.332859000  | -3.065411000 | 2.265631000  |
| C | 3.558456000  | -4.249916000 | 0.206029000  |



|   |              |              |              |
|---|--------------|--------------|--------------|
| H | 4.237100000  | -4.297826000 | -0.653052000 |
| H | 4.160783000  | -4.215285000 | 1.120027000  |
| H | 2.991241000  | -5.185552000 | 0.228975000  |
| F | -6.543601000 | -0.704595000 | 0.918490000  |
| F | 6.687854000  | -0.444210000 | 0.475257000  |
